# Supplementary material for: Global Mapping of H3K4 Trimethylation (H3K4me3) and Transcriptome Analysis Reveal Genes Involved in the Response to Epidemic Diarrhea Virus Infections in Pigs
Source: PubMed Central journal article supplement (PMC6719071; doi:10.3390/ani9080523), 2019-08-02
Supplement: animals-09-00523-s001.pdf [file animals-09-00523-s001.pdf]

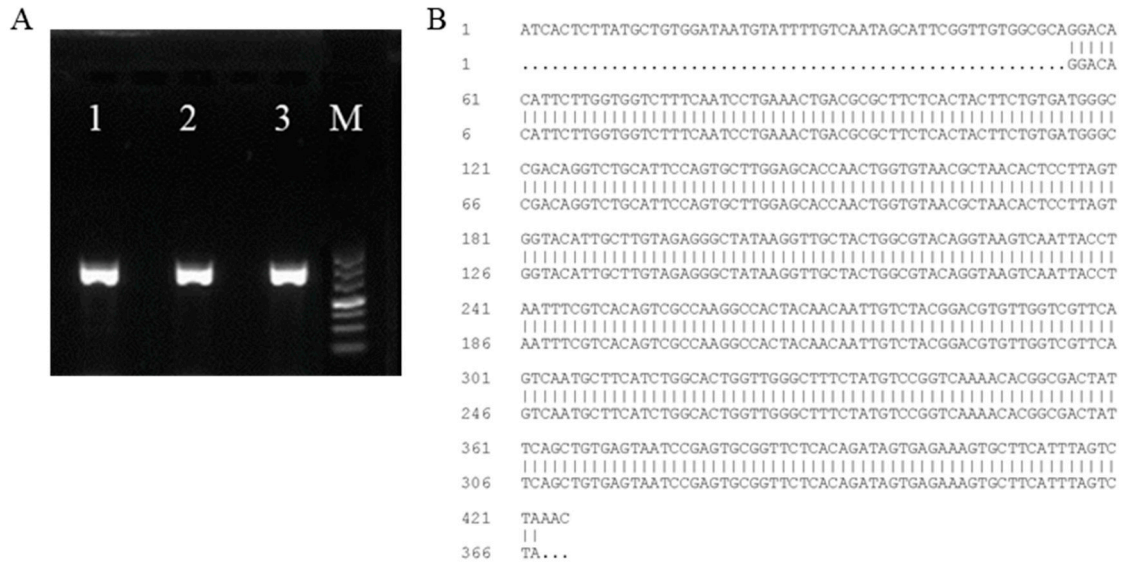

**Figure S1.** Amplification of PEDV M gene and PCR sequencing. (A) PCR products of PEDV M gene. Lanes 1, 2, and 3 represent the PCR products of PEDV-infected samples; M: 50 bp DNA ladder. (B) Alignment of the M gene sequence (upper line) and PCR product sequence (lower line).

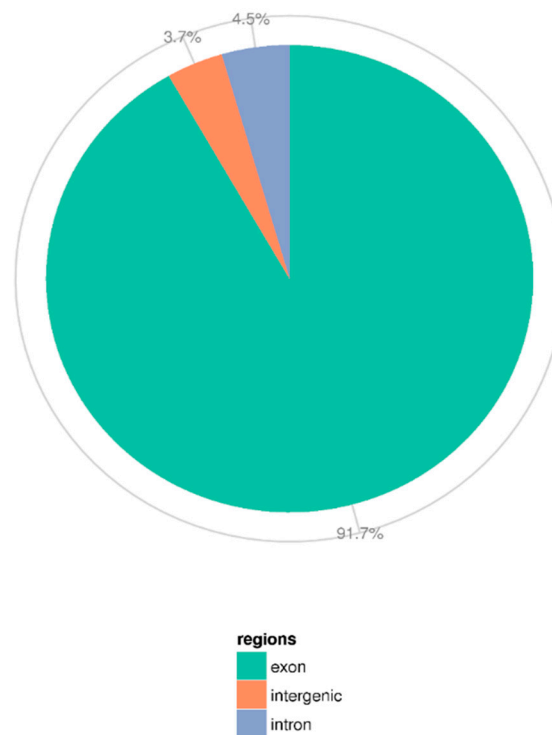

**Figure S2.** Percent of reads mapped to the genomic regions. Shown is an example of alignment analysis results of one randomly selected sample.

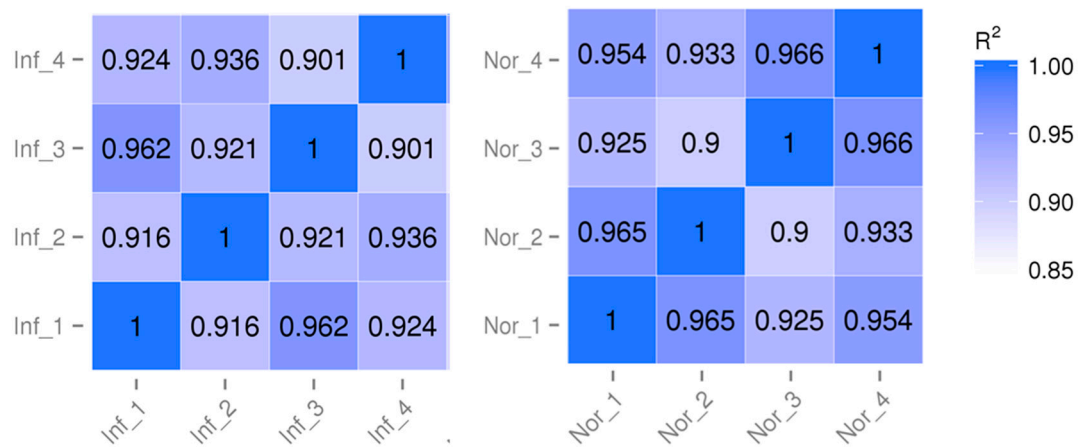

**Figure S3.** Pearson correlation coefficients between the samples within each group. Correlation analysis was performed based on the log<sub>10</sub> (FPKM+1) that represent the gene expression levels. Inf\_1, Inf\_2, Inf\_3, and Inf\_4 denote the infected samples, and Nor\_1, Nor\_2, Nor\_3, and Nor\_4 denote the control samples.

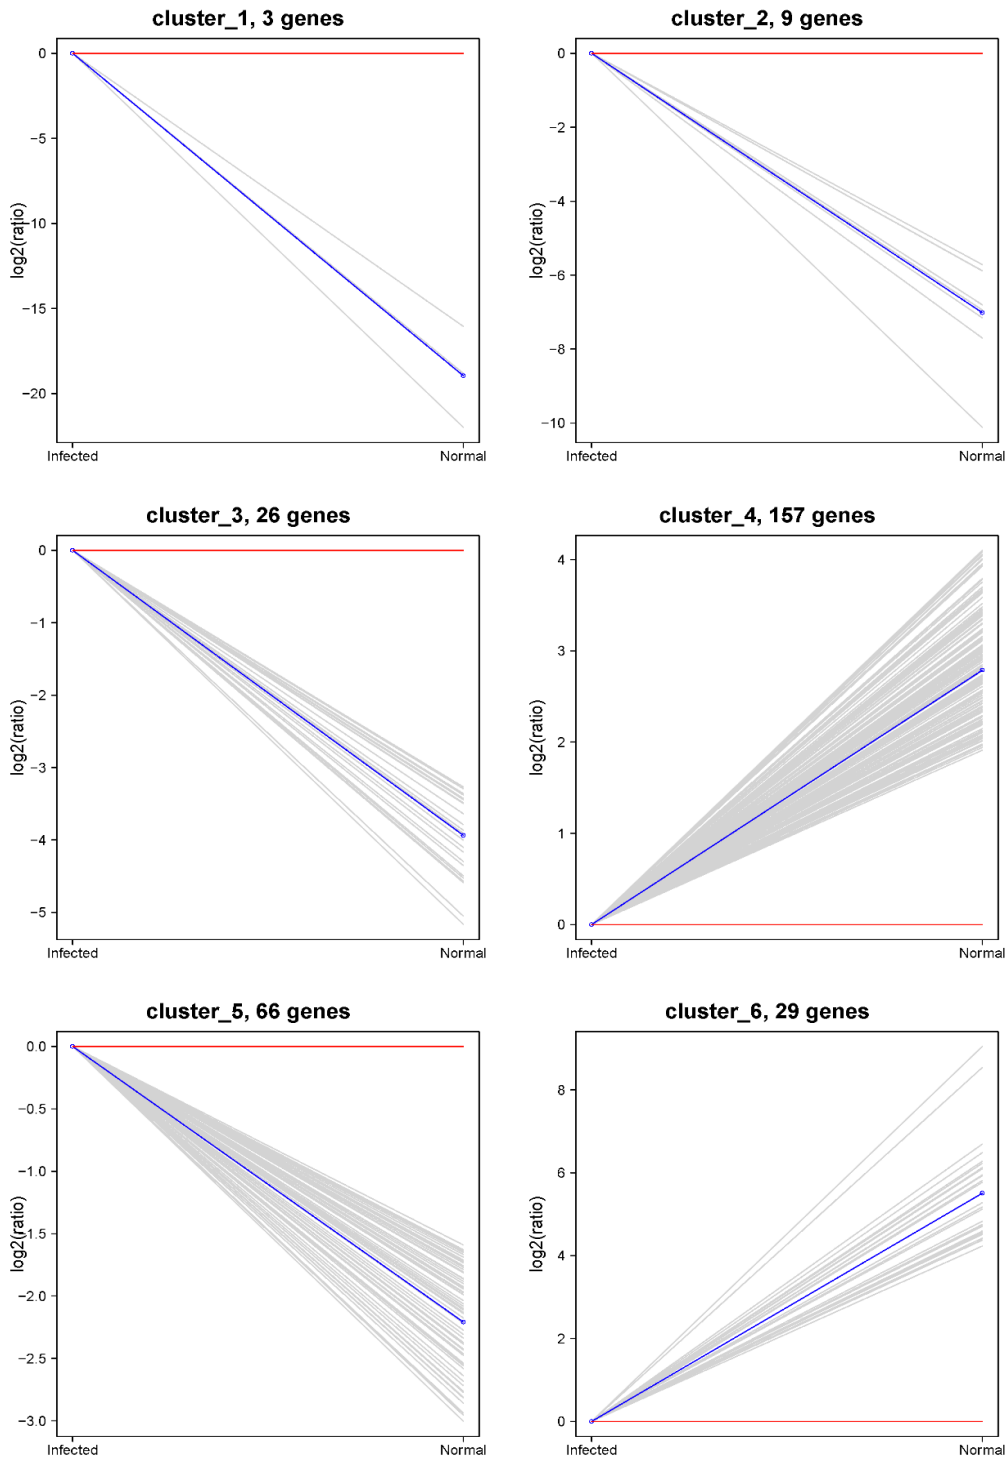

**Figure S4.** Clusters of the differential expression genes by K-means clustering analysis. The genes were clustered into six clusters (cluster 1 to cluster 6) which consisted of 3, 9, 26, 157, 66, and 29 genes, respectively. The gray lines denote the relative gene expression level between the infected and control, and the blue line denotes the means of expression level of all genes in the cluster.

**Table S1.** Primer sequences used for qRT-PCR.

| Gene symbol | Forward (5'-3')           | Reverse (5'-3')       | Annealing temperature (°C) | Reference/Accession |
|-------------|---------------------------|-----------------------|----------------------------|---------------------|
| APOC3       | AGGACACCTCCCTTCTGGAC      | GTCGGTGAACCTGCCCTTGA  | 60                         | [1]                 |
| ANXA4       | GCGAAGAGCCATGAAGGGA       | GCCACCAGCGGACAGAGAC   | 60                         | NM_001167639.1      |
| APOA1       | GTTCTGGGACAACCTGGAAA      | GCTGCACCTTCTTCTTCACC  | 60                         | [2]                 |
| AGR2        | TGCTTGTGGCCCTCTCTTAT      | GGGTTTGTTGCTTGTCTTGG  | 60                         | NM_001244968.1      |
| ENTPD5      | CTTGGAAAACTCAGGGATGGA     | TGGGTGGAGACAAATGTAGGA | 60                         | XM_021099509.1      |
| EPHX1       | CTGCTGACAGTCATCATGCTCTACT | GTGGACCTTGATCGCCTCAT  | 60                         | NM_214355.1         |
| GDPD2       | CCACAGCCCCATTCCTTC        | GCCCCTCGGTGTCCCATC    | 60                         | XM_003135152.4      |
| HK2         | CATCCGCTTCCTCCGCTCT       | CCTCGCTCCATTTCCACCT   | 60                         | NM_001122987.1      |
| NPM3        | GCTCCAACCACCTGTAACCT      | ACTCCCCTCTTCTTCACTCT  | 60                         | XM_003359343.4      |
| OASL        | CCTATGGCTACAGATGGGAC      | GGACTGGGCTCTTGTGTGT   | 60                         | [3]                 |
| PNP-2       | ACAGTTTGTCTCCATCCTTA      | AATCTTCCTCTCCTTTTTGC  | 60                         | XM_013989064.2      |
| ISG15       | GATGCTGGGAGGCAAGGA        | CAGGATGCTCAGTGGGTCTCT | 60                         | [4]                 |
| SLC40A1     | CTGGAATAATGGGAACTGTGG     | TGGCTCTGTCTGAATGAACCT | 60                         | XM_003483701.4      |
| UPP1        | CGGCTATGTTTGGAGATGTG      | ATGATGGCAATGGAGGGAAT  | 60                         | XM_021078790.1      |
| GAPDH       | ACATCATCCCTGCTTCTACTGG    | CTCGGACGCCTGCTTCAC    | 60                         | AF017079.1          |

## References

[1] Ogłuszka, M.; Szostak, A.; Te Pas, M.F.W.; Poławska, E.; Urbański, P.; Blicharski, T.; Pareek, C.S.; Juszczuk-Kubiak, E.; Dunkelberger, J.R.;

Horbańczuk, J.O.; et al. A porcine gluteus medius muscle genome-wide transcriptome analysis: dietary effects of omega-6 and omega-3 fatty acids on biological mechanisms. *Genes Nutr.* **2017**, *12*, 4.

[2] Skovgaard, K.; Mortensen, S.; Boye, M.; Poulsen, K. T.; Campbell, F. M.; Eckersall, P.D.; Heegaard, P.M.H. Rapid and widely disseminated acute phase protein response after experimental bacterial infection of pigs. *Vet. Res.* **2009**, *40*, 336-336.

[3] Zheng, S.; Zhu, D.; Lian, X.; Liu, W.; Cao, R.; Chen, P. Porcine 2', 5'-oligoadenylate synthetases inhibit japanese encephalitis virus replication in vitro. *J. Med. Virol.* **2016**, *88*, 760-768.

[4] Huang, J.; Zhao, S.; Zhu, M.; Wu, Z.; Yu, M. Sequence and expression analyses of porcine isg15 and isg43 genes. *Comp. Biochem. Physiol. B Biochem. Mol. Biol.* **2009**, *153*, 0-309.

**Table S2.** Statistics for RNA-seq data of all samples.

| Sample name | Raw reads | Clean reads | Clean bases | Error rate(%) | Q20(%) | Q30(%) | GC content(%) |
|-------------|-----------|-------------|-------------|---------------|--------|--------|---------------|
| Inf_1       | 51964190  | 50110508    | 7.52G       | 0.02          | 96.36  | 91.25  | 55.72         |
| Inf_2       | 51882108  | 50528298    | 7.58G       | 0.02          | 96.98  | 92.45  | 51.62         |
| Inf_3       | 58170206  | 56681794    | 8.5G        | 0.02          | 96.81  | 92.16  | 52.9          |
| Inf_4       | 49020254  | 47251880    | 7.09G       | 0.02          | 96.81  | 92.1   | 52.94         |
| Nor_1       | 55848424  | 54458148    | 8.17G       | 0.01          | 97.44  | 93.53  | 54.6          |
| Nor_2       | 54855556  | 53478346    | 8.02G       | 0.02          | 96.94  | 92.35  | 54.97         |
| Nor_3       | 46307770  | 45274664    | 6.79G       | 0.02          | 96.99  | 92.42  | 50.97         |
| Nor_4       | 56014286  | 54632550    | 8.19G       | 0.02          | 96.88  | 92.22  | 52.21         |

Inf\_1, Inf\_2, Inf\_3, and Inf\_4 represent the PEDV-infected samples; Nor\_1, Nor\_2, Nor\_3, and Nor\_4 represent the control samples.

**Table S3.** Summary of RNA-seq mapping results.

| Sample name      | Inf_1             | Inf_2             | Inf_3             | Inf_4             | Nor_1             | Nor_2             | Nor_3             | Nor_4             |
|------------------|-------------------|-------------------|-------------------|-------------------|-------------------|-------------------|-------------------|-------------------|
| Total reads      | 50110508          | 50528298          | 56681794          | 47251880          | 54458148          | 53478346          | 45274664          | 54632550          |
| Total mapped     | 43558318 (86.92%) | 45516333 (90.08%) | 50162599 (88.5%)  | 42075049 (89.04%) | 48510542 (89.08%) | 47746114 (89.28%) | 42220781 (93.25%) | 49774246 (91.11%) |
| Multiple mapped  | 4365414 (8.71%)   | 1240103 (2.45%)   | 3767843 (6.65%)   | 1237691 (2.62%)   | 1522978 (2.8%)    | 1302712 (2.44%)   | 888181 (1.96%)    | 1361862 (2.49%)   |
| Uniquely mapped  | 39192904 (78.21%) | 44276230 (87.63%) | 46394756 (81.85%) | 40837358 (86.42%) | 46987564 (86.28%) | 46443402 (86.85%) | 41332600 (91.29%) | 48412384 (88.61%) |
| Read-1           | 19874852 (39.66%) | 22297418 (44.13%) | 23392841 (41.27%) | 20626485 (43.65%) | 23698386 (43.52%) | 23398204 (43.75%) | 20825946 (46%)    | 24384164 (44.63%) |
| Read-2           | 19318052 (38.55%) | 21978812 (43.5%)  | 23001915 (40.58%) | 20210873 (42.77%) | 23289178 (42.77%) | 23045198 (43.09%) | 20506654 (45.29%) | 24028220 (43.98%) |
| Reads map to '+' | 19631733 (39.18%) | 22094958 (43.73%) | 23166487 (40.87%) | 20386058 (43.14%) | 23474911 (43.11%) | 23200167 (43.38%) | 20628114 (45.56%) | 24162536 (44.23%) |
| Reads map to '-' | 19561171 (39.04%) | 22181272 (43.9%)  | 23228269 (40.98%) | 20451300 (43.28%) | 23512653 (43.18%) | 23243235 (43.46%) | 20704486 (45.73%) | 24249848 (44.39%) |
| Non-splice reads | 21007802 (41.92%) | 23596762 (46.7%)  | 25775118 (45.47%) | 22607173 (47.84%) | 25722127 (47.23%) | 26510122 (49.57%) | 24744453 (54.65%) | 27221483 (49.83%) |
| Splice reads     | 18185102 (36.29%) | 20679468 (40.93%) | 20619638 (36.38%) | 18230185 (38.58%) | 21265437 (39.05%) | 19933280 (37.27%) | 16588147 (36.64%) | 21190901 (38.79%) |

Inf\_1, Inf\_2, Inf\_3, and Inf\_4 represent the PEDV-infected samples; Nor\_1, Nor\_2, Nor\_3, and Nor\_4 represent the control samples.

**Table S4.** Differential expression genes between PEDV-infected and control groups.

| Gene ID   | Read count<br>Infected | Read count<br>Normal | Log2 Fold<br>Change | P value  | Adjusted P<br>value | Gene Name    |
|-----------|------------------------|----------------------|---------------------|----------|---------------------|--------------|
| 414380    | 7.062879945            | 458.674154           | -6.0211             | 1.10E-19 | 2.71E-15            | DIO1         |
| 403104    | 2.648180345            | 1196.14734           | -8.8192             | 2.79E-15 | 3.45E-11            | CYP2B22      |
| 406187    | 4502.053242            | 101144.3495          | -4.4897             | 7.14E-15 | 5.87E-11            | APOC3        |
| 110261001 | 1.517730265            | 132.2506364          | -6.4452             | 3.15E-14 | 1.94E-10            | LOC110261001 |
| 100523844 | 114.532665             | 2.664185773          | 5.4259              | 2.06E-13 | 1.02E-09            | PIK3C2G      |
| 100515970 | 29.60257566            | 561.7352392          | -4.2461             | 5.13E-13 | 2.11E-09            | OSBP2        |
| 110255314 | 11.69745033            | 255.8717125          | -4.4512             | 8.44E-13 | 2.98E-09            | LOC110255314 |
| 100155204 | 8.234480785            | 193.2503158          | -4.5526             | 2.25E-12 | 6.16E-09            | ZBBX         |
| 100157319 | 14.79516526            | 449.6201503          | -4.9255             | 2.09E-12 | 6.16E-09            | SDR16C5      |
| 100738360 | 46.09527069            | 655.6525309          | -3.8302             | 9.90E-12 | 2.44E-08            | PDIA2        |
| 595119    | 2119.218907            | 166.4622486          | 3.6703              | 3.61E-11 | 8.10E-08            | OASL         |
| 100525396 | 536.8132439            | 41.11941225          | 3.7065              | 9.37E-11 | 1.78E-07            | LOC100525396 |
| 397677    | 87.85229669            | 4517.724589          | -5.6844             | 9.18E-11 | 1.78E-07            | FOLH1B       |
| 100628018 | 600.3133545            | 8232.409101          | -3.7775             | 1.31E-10 | 2.31E-07            | SLC46A1      |
| 100623097 | 542.0145186            | 7576.734489          | -3.8052             | 1.62E-10 | 2.67E-07            | SLC30A10     |
| 100156419 | 145.5578175            | 1534.254198          | -3.3979             | 2.11E-10 | 3.26E-07            | HOMER2       |
| 100510974 | 413.2052509            | 33.33126825          | 3.6319              | 2.91E-10 | 4.23E-07            | COL28A1      |
| 100516309 | 40.90502095            | 565.3841177          | -3.7889             | 3.12E-10 | 4.27E-07            | GDPD2        |
| 100156489 | 95.62438278            | 4.590001807          | 4.3808              | 4.33E-10 | 5.63E-07            | TGM1         |
| 100515798 | 542.8801212            | 49.54044244          | 3.454               | 7.87E-10 | 9.71E-07            | ARL14        |
| 100517307 | 29.602324              | 331.0605854          | -3.4833             | 2.07E-09 | 2.43E-06            | SLC6A4       |
| 100157318 | 739.5415214            | 43.02581697          | 4.1034              | 2.40E-09 | 2.69E-06            | APOD         |
| 733625    | 791.4893522            | 35.82577461          | 4.4655              | 4.33E-09 | 4.65E-06            | SFN          |
| 100627655 | 0.82490317             | 50.37163329          | -5.9322             | 4.89E-09 | 5.03E-06            | LOC100627655 |
| 397373    | 176.0306336            | 1585.765997          | -3.1713             | 6.32E-09 | 6.24E-06            | MYO7A        |
| 100620627 | 20.42009613            | 649.7789361          | -4.9919             | 6.64E-09 | 6.31E-06            | LOC100620627 |
| 692188    | 61.12237917            | 722.9782049          | -3.5642             | 7.55E-09 | 6.90E-06            | APOM         |
| 110256150 | 137.9489397            | 1184.956602          | -3.1026             | 9.20E-09 | 8.11E-06            | KCNJ12       |
| 100153752 | 14.88519008            | 232.5892431          | -3.9658             | 1.03E-08 | 8.50E-06            | CLDN10       |
| 106505478 | 942.1261064            | 106.2673261          | 3.1482              | 1.00E-08 | 8.50E-06            | LOC106505478 |
| 733608    | 7657.057496            | 1013.129757          | 2.918               | 1.25E-08 | 9.65E-06            | S100A6       |
| 100125551 | 169.7073795            | 1358.534046          | -3.0009             | 1.37E-08 | 1.03E-05            | SLC2A8       |



|           |             |             |         |          |            |              |
|-----------|-------------|-------------|---------|----------|------------|--------------|
| 106505337 | 75.50729955 | 4.436794567 | 4.089   | 1.58E-08 | 1.15E-05   | LOC106505337 |
| 397691    | 65343.70832 | 636753.8988 | -3.2846 | 1.85E-08 | 1.31E-05   | APOA1        |
| 100738704 | 82.35121334 | 3.291872103 | 4.6448  | 1.93E-08 | 1.32E-05   | TNIP3        |
| 100737113 | 47.98680973 | 2.298964935 | 4.3836  | 4.39E-08 | 2.85E-05   | LOC100737113 |
| 100126844 | 118.5235199 | 2440.529245 | -4.3639 | 4.99E-08 | 3.16E-05   | GATM         |
| 100512452 | 1197.402086 | 107.4162796 | 3.4786  | 8.69E-08 | 5.23E-05   | GALNT12      |
| 100625897 | 5384.632347 | 34459.373   | -2.678  | 1.55E-07 | 8.52E-05   | LOC100625897 |
| 100625192 | 14.23478634 | 236.1401625 | -4.0522 | 1.73E-07 | 9.31E-05   | GCKR         |
| 100156922 | 282.9634985 | 34.03812745 | 3.0554  | 1.96E-07 | 0.0001032  | MAT1A        |
| 100521889 | 56.32759432 | 3.976850743 | 3.8241  | 2.11E-07 | 0.00010851 | ADGRE1       |
| 414904    | 342.7626871 | 5.410987817 | 5.9852  | 2.58E-07 | 0.00012984 | CXCL2        |
| 110257275 | 11.20839585 | 107.368773  | -3.2599 | 2.81E-07 | 0.00013852 | LOC110257275 |
| 100134962 | 261.0502181 | 1723.426346 | -2.7229 | 3.06E-07 | 0.00014822 | PHYH         |
| 100625277 | 2427.471387 | 378.9067256 | 2.6795  | 3.90E-07 | 0.00018496 | UPP1         |
| 100520068 | 40.19530006 | 293.3411389 | -2.8675 | 4.84E-07 | 0.00022522 | PCDH12       |
| 100156404 | 50.66066643 | 625.7451999 | -3.6266 | 5.82E-07 | 0.00026583 | PGF          |
| 100312960 | 12614.08746 | 1955.88924  | 2.6891  | 6.41E-07 | 0.00028767 | ANXA4        |
| 100518950 | 601.4062675 | 2.861991888 | 7.7152  | 7.64E-07 | 0.00033427 | FGF19        |
| 100521912 | 143.2750411 | 871.5852239 | -2.6049 | 7.72E-07 | 0.00033427 | WNT11        |
| 100739839 | 13.82622965 | 130.4343503 | -3.2378 | 1.01E-06 | 0.00041396 | SPATC1       |
| 494561    | 391.8121505 | 60.74969244 | 2.6892  | 9.90E-07 | 0.00041396 | HK2          |
| 100135678 | 169.3444522 | 24.37646512 | 2.7964  | 1.12E-06 | 0.00044696 | PDE6C        |
| 100512737 | 1010.480369 | 6784.614331 | -2.7472 | 1.11E-06 | 0.00044696 | SLC13A2      |
| 100514218 | 11.73876786 | 96.81290643 | -3.0439 | 1.16E-06 | 0.00045493 | GJC2         |
| 100158243 | 340.4624586 | 1916.692834 | -2.4931 | 1.26E-06 | 0.00048441 | SLC16A3      |
| 102161066 | 21.82008332 | 155.6475917 | -2.8346 | 1.34E-06 | 0.00050976 | LOC102161066 |
| 100516363 | 40.1712932  | 370.2857648 | -3.2044 | 1.40E-06 | 0.00051999 | NAT8         |
| 100626731 | 12.4038322  | 104.9812892 | -3.0813 | 1.57E-06 | 0.00057029 | LOC100626731 |
| 100524747 | 58.7583808  | 354.3702728 | -2.5924 | 1.64E-06 | 0.00058677 | DBP          |
| 100516578 | 145.1269753 | 821.0362954 | -2.5001 | 2.09E-06 | 0.00073866 | CCDC80       |
| 100151843 | 169.9459462 | 1012.457821 | -2.5747 | 2.19E-06 | 0.00076002 | SNTA1        |
| 110262031 | 93.41387646 | 539.1338626 | -2.5289 | 2.79E-06 | 0.00095486 | LOC110262031 |
| 397207    | 41.59337535 | 0           | Inf     | 3.00E-06 | 0.0010156  | HAMP         |
| 100155341 | 101.8776285 | 587.5995942 | -2.528  | 3.38E-06 | 0.001129   | NEIL1        |

|           |             |             |         |          |           |              |
|-----------|-------------|-------------|---------|----------|-----------|--------------|
| 100144620 | 176.31037   | 3233.62509  | -4.197  | 3.55E-06 | 0.0011539 | AQP10        |
| 100522927 | 189.4055852 | 1071.315422 | -2.4998 | 3.55E-06 | 0.0011539 | CGREF1       |
| 100153155 | 14.1703251  | 107.1046604 | -2.9181 | 3.81E-06 | 0.0011702 | XCL1         |
| 100155893 | 526.1751633 | 96.11947137 | 2.4526  | 3.68E-06 | 0.0011702 | ARG2         |
| 100157662 | 38.09419094 | 0.221801735 | 7.4242  | 3.77E-06 | 0.0011702 | HOXD1        |
| 106505853 | 29.10957067 | 179.5889912 | -2.6251 | 3.84E-06 | 0.0011702 | LOC106505853 |
| 397358    | 1396.869704 | 7341.483186 | -2.3939 | 3.72E-06 | 0.0011702 | SLC9A3       |
| 100171400 | 34.08652859 | 1093.797307 | -5.004  | 3.99E-06 | 0.0012014 | TRPV6        |
| 110256043 | 976.0847854 | 177.5844433 | 2.4585  | 4.46E-06 | 0.001327  | LOC110256043 |
| 100523209 | 592.8822791 | 2978.985942 | -2.329  | 4.59E-06 | 0.0013497 | COL7A1       |
| 100151790 | 243.3490291 | 1367.727192 | -2.4907 | 4.65E-06 | 0.0013506 | PMM1         |
| 100513308 | 965.6841669 | 6276.514351 | -2.7003 | 5.22E-06 | 0.0014994 | TM4SF5       |
| 100624476 | 474.7413285 | 2327.982142 | -2.2939 | 5.39E-06 | 0.0015297 | PRDM16       |
| 100157774 | 413.0628608 | 2098.418441 | -2.3449 | 5.55E-06 | 0.001557  | SLC25A27     |
| 100523600 | 76.66483625 | 658.1421013 | -3.1018 | 5.72E-06 | 0.0015865 | PCP4L1       |
| 100145895 | 10966.67191 | 2148.166602 | 2.3519  | 6.58E-06 | 0.0018039 | ISG15        |
| 100519006 | 2.533973993 | 119.443043  | -5.5588 | 6.85E-06 | 0.0018568 | DUSP9        |
| 100515460 | 19.57145    | 132.0847003 | -2.7546 | 7.09E-06 | 0.0019025 | USP27X       |
| 100152247 | 509.9493411 | 2640.159201 | -2.3722 | 7.25E-06 | 0.0019097 | TP53INP2     |
| 100511370 | 1649.510322 | 323.5339706 | 2.35    | 7.27E-06 | 0.0019097 | HSH2D        |
| 100739671 | 33.3272125  | 195.4511454 | -2.552  | 7.49E-06 | 0.0019473 | ESM1         |
| 106505256 | 9.73146266  | 182.8252913 | -4.2317 | 7.73E-06 | 0.001988  | LOC106505256 |
| 100627807 | 6065.433252 | 952.1357064 | 2.6714  | 8.09E-06 | 0.0020426 | RBM3         |
| 100127358 | 9473.133327 | 1935.817034 | 2.2909  | 8.61E-06 | 0.0021393 | IFITM1       |
| 100523325 | 8.389476546 | 208.9731832 | -4.6386 | 8.67E-06 | 0.0021393 | ASB4         |
| 100737774 | 6.484872216 | 71.39080687 | -3.4606 | 1.11E-05 | 0.0026914 | LRRC17       |
| 654317    | 65.81102037 | 668.0629696 | -3.3436 | 1.11E-05 | 0.0026914 | NR1I3        |
| 110256498 | 92.6564798  | 12.96652134 | 2.8371  | 1.14E-05 | 0.0027408 | CBS          |
| 100156756 | 14.94665065 | 165.6888275 | -3.4706 | 1.24E-05 | 0.0029128 | ACVR1C       |
| 100157138 | 3232.912053 | 370.3044663 | 3.1261  | 1.25E-05 | 0.0029128 | PNP          |
| 100519115 | 4.725979052 | 43.46979927 | -3.2013 | 1.28E-05 | 0.0029254 | ADAMTS16     |
| 102161637 | 7.207162494 | 177.8711782 | -4.6253 | 1.27E-05 | 0.0029254 | LOC102161637 |
| 102164363 | 2.800451896 | 35.15656681 | -3.6501 | 1.80E-05 | 0.0040732 | LOC102164363 |
| 100738302 | 439.0498    | 96.54872451 | 2.1851  | 1.91E-05 | 0.0042847 | CEACAM19     |

|           |             |             |         |          |           |              |
|-----------|-------------|-------------|---------|----------|-----------|--------------|
| 100523389 | 359.2645303 | 1688.024985 | -2.2322 | 2.03E-05 | 0.0045111 | SLC37A2      |
| 397013    | 56.57283153 | 310.1053672 | -2.4546 | 2.06E-05 | 0.0045352 | PPARGC1A     |
| 100515408 | 68.6391872  | 356.8997324 | -2.3784 | 2.11E-05 | 0.0046004 | SHPK         |
| 100158214 | 209.7059571 | 1008.345277 | -2.2655 | 2.45E-05 | 0.005313  | FLRT3        |
| 100522832 | 7.176178137 | 54.81016978 | -2.9332 | 2.62E-05 | 0.0056178 | GPR156       |
| 100512564 | 579.2349771 | 125.4192832 | 2.2074  | 2.75E-05 | 0.0058324 | FAM117B      |
| 100623615 | 22.05380402 | 1.062929658 | 4.3749  | 2.76E-05 | 0.0058324 | LY6D         |
| 100514979 | 23.98471332 | 194.3124127 | -3.0182 | 2.93E-05 | 0.0061213 | LOC100514979 |
| 100141405 | 6044.156959 | 26182.02079 | -2.115  | 3.13E-05 | 0.0064922 | CTSZ         |
| 100511895 | 621.0209614 | 2777.401892 | -2.161  | 3.34E-05 | 0.0068096 | SLC25A15     |
| 100512800 | 25.44146335 | 134.1593691 | -2.3987 | 3.37E-05 | 0.0068096 | SCN4B        |
| 396900    | 476.796436  | 101.7173123 | 2.2288  | 3.32E-05 | 0.0068096 | AMCF-II      |
| 100516107 | 3.096039296 | 32.41574316 | -3.3882 | 3.44E-05 | 0.0069095 | LRRC3C       |
| 100516755 | 691.5906154 | 150.3544636 | 2.2016  | 3.47E-05 | 0.0069167 | ETV4         |
| 100153917 | 64.86025854 | 426.8400739 | -2.7183 | 3.52E-05 | 0.0069272 | SLITRK6      |
| 100522112 | 5696.55909  | 1232.839977 | 2.2081  | 3.54E-05 | 0.0069272 | GCNT3        |
| 100521587 | 45.12202169 | 5.221298311 | 3.1114  | 3.77E-05 | 0.0073318 | ECEL1        |
| 100515264 | 358.4501221 | 1584.003638 | -2.1437 | 4.04E-05 | 0.0077267 | CAMK2N1      |
| 110256469 | 17.94667455 | 0.718039279 | 4.6435  | 4.01E-05 | 0.0077267 | LOC110256469 |
| 100511886 | 735.5754444 | 5.540820063 | 7.0526  | 4.39E-05 | 0.0083279 | FGFBP1       |
| 100048965 | 730.8634264 | 3079.732671 | -2.0751 | 4.79E-05 | 0.008958  | PGRMC2       |
| 100153250 | 420.00645   | 3565.119585 | -3.0855 | 4.84E-05 | 0.0089677 | GPD1         |
| 110255503 | 8.806904054 | 60.47101287 | -2.7795 | 4.90E-05 | 0.0089677 | LOC110255503 |
| 110259489 | 15.6332355  | 88.56731144 | -2.5022 | 4.87E-05 | 0.0089677 | TIFAB        |
| 100623751 | 82.66254851 | 397.0831191 | -2.2641 | 5.20E-05 | 0.0093738 | RPS6KA5      |
| 397166    | 11.39774721 | 71.37140408 | -2.6466 | 5.20E-05 | 0.0093738 | MS4A2        |
| 100192320 | 11.78894389 | 847.8293013 | -6.1683 | 5.52E-05 | 0.0098341 | BCO1         |
| 399532    | 1270.938292 | 292.104155  | 2.1213  | 5.54E-05 | 0.0098341 | FABP3        |
| 100154506 | 2201.110364 | 9419.203557 | -2.0974 | 5.65E-05 | 0.0099617 | ENTPD5       |
| 403215    | 137.4240362 | 763.4250569 | -2.4739 | 6.85E-05 | 0.011989  | CYP2C49      |
| 100524750 | 605.8267097 | 2402.549581 | -1.9876 | 7.16E-05 | 0.012442  | CYP2J34      |
| 100152368 | 282.0109906 | 1187.263877 | -2.0738 | 7.33E-05 | 0.012659  | EGLN3        |
| 100187577 | 265.9503026 | 59.97532994 | 2.1487  | 7.62E-05 | 0.012888  | LRP8         |
| 100627912 | 560.6016393 | 2570.24453  | -2.1969 | 7.57E-05 | 0.012888  | GDPD5        |

|           |             |             |         |            |          |              |
|-----------|-------------|-------------|---------|------------|----------|--------------|
| 397200    | 750.135762  | 3138.344518 | -2.0648 | 7.62E-05   | 0.012888 | SLC28A1      |
| 102165025 | 5.25065098  | 44.09174326 | -3.0699 | 7.75E-05   | 0.013013 | LOC102165025 |
| 100623590 | 73.9878581  | 13.73264075 | 2.4297  | 8.09E-05   | 0.013368 | PKP1         |
| 110257555 | 7.575735922 | 61.59810511 | -3.0234 | 8.03E-05   | 0.013368 | LOC110257555 |
| 100514726 | 572.8322276 | 3707.548527 | -2.6943 | 8.38E-05   | 0.01361  | ENPP7        |
| 100521274 | 849.6270036 | 3665.863621 | -2.1093 | 8.33E-05   | 0.01361  | FAM131C      |
| 100152827 | 7.33097467  | 102.4765852 | -3.8051 | 8.83E-05   | 0.014147 | FCER1A       |
| 497235    | 242.9409619 | 1090.978547 | -2.1669 | 8.79E-05   | 0.014147 | SLC5A10      |
| 100524951 | 23.56593908 | 1.873750439 | 3.6527  | 9.09E-05   | 0.01447  | ACOD1        |
| 100625050 | 1182.670272 | 279.6946268 | 2.0801  | 9.14E-05   | 0.01447  | EPSTI1       |
| 100522244 | 25.81875615 | 0.197669717 | 7.0292  | 9.24E-05   | 0.014491 | SCNN1G       |
| 100622812 | 351.7361089 | 84.86818193 | 2.0512  | 9.28E-05   | 0.014491 | DUSP2        |
| 397687    | 616.8098004 | 4116.087607 | -2.7384 | 9.38E-05   | 0.014567 | CYP2D25      |
| 100151780 | 155.956284  | 1078.962561 | -2.7904 | 9.68E-05   | 0.014757 | KCNJ13       |
| 399542    | 15.19405889 | 0.241943648 | 5.9727  | 9.62E-05   | 0.014757 | SLC5A5       |
| 100144410 | 297.3597858 | 1186.873626 | -1.9969 | 9.77E-05   | 0.014788 | TPPP         |
| 100157026 | 480.2612192 | 112.0736648 | 2.0994  | 9.96E-05   | 0.014949 | MTFR2        |
| 102159476 | 154.1478021 | 1001.593329 | -2.6999 | 9.99E-05   | 0.014949 | LOC102159476 |
| 102165634 | 472.8300002 | 1945.280686 | -2.0406 | 0.00010075 | 0.014982 | LOC102165634 |
| 106509607 | 29.0095569  | 135.7216352 | -2.2261 | 0.00010151 | 0.015005 | LOC106509607 |
| 100144591 | 2094.979824 | 14887.69734 | -2.8291 | 0.00010217 | 0.015013 | CYBRD1       |
| 100515143 | 20.08467835 | 147.5994045 | -2.8775 | 0.00010371 | 0.015138 | RNF207       |
| 100626343 | 1161.497253 | 5574.009335 | -2.2627 | 0.00010425 | 0.015138 | ABCD3        |
| 106508195 | 0.264757499 | 14.2413282  | -5.7493 | 0.00010502 | 0.01516  | TAS2R40      |
| 100737517 | 3347.802551 | 14292.34056 | -2.094  | 0.00010645 | 0.015278 | SLC40A1      |
| 100515955 | 47.58790973 | 226.7998842 | -2.2528 | 0.00010845 | 0.015386 | PTPRU        |
| 100627632 | 22.06275973 | 111.0958561 | -2.3321 | 0.00010824 | 0.015386 | ZKSCAN7      |
| 100519539 | 152.6369392 | 832.090423  | -2.4466 | 0.00011026 | 0.015553 | KLHL3        |
| 110259946 | 2.967481256 | 31.13344386 | -3.3912 | 0.00011129 | 0.015609 | LOC110259946 |
| 100294675 | 380.5537124 | 5362.424784 | -3.8167 | 0.00011702 | 0.01632  | DGAT2        |
| 100621352 | 1059.07813  | 76.98765812 | 3.782   | 0.00011812 | 0.016381 | LOC100621352 |
| 110260940 | 7.626111177 | 49.97213525 | -2.7121 | 0.00011907 | 0.01642  | LOC110260940 |
| 100739218 | 6757.85641  | 1690.290061 | 1.9993  | 0.00012571 | 0.017144 | LOC100739218 |
| 110259210 | 89.12761609 | 14.39446505 | 2.6304  | 0.0001274  | 0.01728  | MUC5AC       |

|           |             |             |         |            |          |              |
|-----------|-------------|-------------|---------|------------|----------|--------------|
| 100158162 | 394.5254686 | 96.76357109 | 2.0276  | 0.00013172 | 0.017685 | ATP10A       |
| 100625759 | 11.16209921 | 63.79112034 | -2.5147 | 0.00013221 | 0.017685 | SMIM1        |
| 110259705 | 28.10216831 | 2410.519864 | -6.4225 | 0.00013254 | 0.017685 | TH           |
| 106506279 | 67.39686297 | 653.8894402 | -3.2783 | 0.00013592 | 0.018039 | LOC106506279 |
| 100512686 | 504.0663441 | 81.40127355 | 2.6305  | 0.00013889 | 0.018281 | IRS1         |
| 100515902 | 866.9411348 | 112.2186208 | 2.9496  | 0.00014188 | 0.018281 | LOC100515902 |
| 100622375 | 594.3928187 | 2290.161801 | -1.946  | 0.00014196 | 0.018281 | SHANK3       |
| 110255508 | 104.6192004 | 21.27835514 | 2.2977  | 0.00013961 | 0.018281 | CER1         |
| 110260216 | 221.0892283 | 23.61761646 | 3.2267  | 0.00014219 | 0.018281 | LOC110260216 |
| 100155467 | 1562.213023 | 391.7909536 | 1.9954  | 0.00014728 | 0.018837 | IFIT2        |
| 100515422 | 93.70943933 | 374.949557  | -2.0004 | 0.00015291 | 0.019389 | MFSD4B       |
| 100515639 | 142.0268003 | 33.23348577 | 2.0955  | 0.00015316 | 0.019389 | PCDH19       |
| 100037938 | 361.5500544 | 89.84802012 | 2.0086  | 0.00015488 | 0.019506 | CD14         |
| 403324    | 2155.222011 | 8684.428581 | -2.0106 | 0.00016234 | 0.020342 | CYP3A29      |
| 397645    | 16992.6644  | 4516.589052 | 1.9116  | 0.0001723  | 0.021373 | SAT1         |
| 110256586 | 13.89285143 | 82.44506693 | -2.5691 | 0.00017718 | 0.021759 | LOC110256586 |
| 100514482 | 10023.63523 | 2698.358014 | 1.8933  | 0.00018375 | 0.022344 | AGR2         |
| 397182    | 33.75899299 | 146.130702  | -2.1139 | 0.0001832  | 0.022344 | IGFBP5       |
| 100518544 | 9569.15744  | 2532.268539 | 1.918   | 0.00018682 | 0.022539 | IFITM3       |
| 397134    | 1685.372701 | 6100.035918 | -1.8558 | 0.00018718 | 0.022539 | DAO          |
| 100037966 | 138.5566187 | 543.1278249 | -1.9708 | 0.00018835 | 0.02257  | SOCS2        |
| 100520832 | 81845.56028 | 9207.749961 | 3.152   | 0.00019202 | 0.022899 | LOC100520832 |
| 396645    | 4300.068263 | 1117.446065 | 1.9442  | 0.00019457 | 0.023091 | IRF8         |
| 100622336 | 259.3471014 | 32.84139438 | 2.9813  | 0.00019629 | 0.023184 | CSF3R        |
| 102167936 | 4.030427747 | 39.00214983 | -3.2745 | 0.00020068 | 0.023477 | LOC102167936 |
| 595111    | 4783.933998 | 1310.453413 | 1.8681  | 0.00020055 | 0.023477 | KLF4         |
| 100625807 | 3419.223635 | 15588.51731 | -2.1887 | 0.00020209 | 0.023531 | LCT          |
| 100736742 | 17.94295728 | 86.92780491 | -2.2764 | 0.00020825 | 0.02391  | GJA8         |
| 397639    | 1179.435935 | 10767.65863 | -3.1905 | 0.00020792 | 0.02391  | EPHX1        |
| 404698    | 929.0959798 | 3613.018015 | -1.9593 | 0.00020743 | 0.02391  | HYAL1        |
| 100153504 | 276.0777243 | 56.61329387 | 2.2859  | 0.00021285 | 0.024242 | F13A1        |
| 100738133 | 17.97843869 | 85.10074069 | -2.2429 | 0.00021311 | 0.024242 | LOC100738133 |
| 100316849 | 7210.921095 | 1855.727433 | 1.9582  | 0.00021795 | 0.024679 | ZFP36        |
| 100510947 | 15.34332977 | 77.7839019  | -2.3419 | 0.00023156 | 0.025982 | PTGDR2       |

|           |             |             |         |            |          |              |
|-----------|-------------|-------------|---------|------------|----------|--------------|
| 768107    | 114.2785482 | 455.4921463 | -1.9949 | 0.00023104 | 0.025982 | RGN          |
| 100158055 | 456.1780182 | 1663.182452 | -1.8663 | 0.00023628 | 0.026392 | OLFML3       |
| 100514091 | 22.80209036 | 108.0243122 | -2.2441 | 0.0002442  | 0.027153 | OTOG         |
| 100233171 | 866.9551194 | 3108.551561 | -1.8422 | 0.00025102 | 0.027663 | AGPAT3       |
| 100157065 | 170.4170669 | 3277.895143 | -4.2656 | 0.00025674 | 0.028168 | ASAH2        |
| 100519179 | 12.51371594 | 115.9679587 | -3.2121 | 0.00025869 | 0.028256 | USP51        |
| 100155159 | 68.24241834 | 468.0860862 | -2.778  | 0.00026249 | 0.028419 | PYROXD2      |
| 102163819 | 1180.492775 | 6350.825045 | -2.4276 | 0.00026226 | 0.028419 | MS4A10       |
| 100157844 | 3815.951828 | 1033.049484 | 1.8851  | 0.00026681 | 0.028636 | PIM1         |
| 100519488 | 20.40262486 | 397.0625873 | -4.2825 | 0.0002665  | 0.028636 | MOV10L1      |
| 100152428 | 1444.57619  | 201.2347481 | 2.8437  | 0.00027288 | 0.02891  | LOC100152428 |
| 100156914 | 394.9367636 | 1365.212127 | -1.7894 | 0.00027592 | 0.029108 | SLC24A4      |
| 100514743 | 381.5275952 | 1502.293605 | -1.9773 | 0.00028234 | 0.029532 | WIPF3        |
| 110256820 | 181.9357766 | 37.35058958 | 2.2842  | 0.00028133 | 0.029532 | LOC110256820 |
| 100514493 | 966.4977771 | 3416.808393 | -1.8218 | 0.00029529 | 0.030627 | ATP1B3       |
| 102159800 | 216.1804276 | 788.5414963 | -1.867  | 0.00029411 | 0.030627 | MVB12B       |
| 100523320 | 1710.728287 | 406.688303  | 2.0726  | 0.00030122 | 0.031112 | SOWAHB       |
| 102164898 | 1229.962097 | 4416.184739 | -1.8442 | 0.00031306 | 0.0322   | SEC16B       |
| 100519529 | 882.1852765 | 4065.975569 | -2.2044 | 0.00031863 | 0.032636 | ABCD1        |
| 100511161 | 245.9354104 | 63.47788325 | 1.954   | 0.00033121 | 0.033646 | PLA2G3       |
| 100156455 | 842.8232605 | 237.4107108 | 1.8278  | 0.00034782 | 0.035045 | TC2N         |
| 100623476 | 62.74123826 | 5.437441252 | 3.5284  | 0.00034664 | 0.035045 | HTR6         |
| 397376    | 480.2198741 | 2261.369685 | -2.2354 | 0.00035096 | 0.035218 | SLC5A4       |
| 100622126 | 2.29140883  | 23.6761392  | -3.3691 | 0.00035845 | 0.035823 | CX3CR1       |
| 100126286 | 2071.887616 | 592.6216575 | 1.8058  | 0.00036308 | 0.036033 | KRT18        |
| 100623809 | 1340.591308 | 4734.773665 | -1.8204 | 0.00036347 | 0.036033 | TMC5         |
| 100522261 | 4907.787562 | 1358.929121 | 1.8526  | 0.00037651 | 0.037177 | PGM2         |
| 100738062 | 19.34275318 | 371.5610028 | -4.2637 | 0.00038127 | 0.037444 | ACOT12       |
| 110260714 | 34.56396482 | 140.7341254 | -2.0256 | 0.00038226 | 0.037444 | ETFBKMT      |
| 396998    | 13.46511072 | 93.97928415 | -2.8031 | 0.0003856  | 0.037623 | HPX          |
| 396764    | 200.3987486 | 31.82829953 | 2.6545  | 0.00038791 | 0.037699 | SLC11A1      |
| 100514568 | 34.98548326 | 141.1495026 | -2.0124 | 0.00039014 | 0.037767 | TMEM38A      |
| 397568    | 2327.273261 | 8132.841789 | -1.8051 | 0.00039238 | 0.037835 | CAT          |
| 100624487 | 20.80699628 | 90.22216106 | -2.1164 | 0.00039416 | 0.037859 | SLC2A10      |

|            |             |             |         |            |          |              |
|------------|-------------|-------------|---------|------------|----------|--------------|
| 100624671  | 84.26914401 | 325.8855905 | -1.9513 | 0.00040769 | 0.039007 | CMTM8        |
| 100622156  | 2538.883969 | 550.0559698 | 2.2065  | 0.00041149 | 0.039068 | TNFAIP3      |
| 110260202  | 1877.043081 | 1.417553186 | 10.371  | 0.00041043 | 0.039068 | ARC          |
| 100624791  | 688.3092863 | 2342.248125 | -1.7668 | 0.00041325 | 0.039085 | PLXNA2       |
| 100511552  | 15.24435691 | 0.889391959 | 4.0993  | 0.00042669 | 0.040201 | CIB3         |
| 110256050  | 73.16987362 | 273.277125  | -1.901  | 0.00043806 | 0.041116 | MMP28        |
| 100155871  | 6.387619763 | 387.7366804 | -5.9237 | 0.00044253 | 0.041222 | SLC16A9      |
| 100622227  | 73.81862221 | 867.3584972 | -3.5546 | 0.00044204 | 0.041222 | LOC100622227 |
| 100520717  | 40.51546745 | 7.1731357   | 2.4978  | 0.00044836 | 0.041452 | YPEL4        |
| 100522981  | 365.0265404 | 1291.584317 | -1.8231 | 0.000448   | 0.041452 | HOOK2        |
| 100628009  | 190.7510925 | 655.2142124 | -1.7803 | 0.00046066 | 0.042117 | XYLB         |
| 396934     | 417.6566396 | 1511.845878 | -1.8559 | 0.00045956 | 0.042117 | RENBP        |
| 397018     | 842.5857094 | 2881.928565 | -1.7741 | 0.00045773 | 0.042117 | SCARB1       |
| 100738064  | 957.1500616 | 0           | Inf     | 0.00046926 | 0.042745 | PLA2G2A      |
| 100522516  | 616.7283834 | 4196.422871 | -2.7665 | 0.00047664 | 0.043099 | GLYCTK       |
| 110260118  | 304.0286983 | 82.21296243 | 1.8868  | 0.00047538 | 0.043099 | SOWAHC       |
| 100522021  | 305.4248124 | 1087.50218  | -1.8321 | 0.00048053 | 0.043237 | LRRC66       |
| 100739719  | 44.97617777 | 322.2472227 | -2.8409 | 0.00048167 | 0.043237 | LOC100739719 |
| 397508     | 104.9002461 | 13.36180689 | 2.9728  | 0.00049262 | 0.044059 | SELE         |
| 100515339  | 47136.17971 | 9946.57151  | 2.2446  | 0.00050216 | 0.04459  | KRT19        |
| 100624628  | 329.0548392 | 62.18236069 | 2.4038  | 0.00050146 | 0.04459  | LOC100624628 |
| 100141314  | 1785.589127 | 10720.37123 | -2.5859 | 0.000514   | 0.044785 | RARRES2      |
| 100516761  | 151.8693748 | 536.6607688 | -1.8212 | 0.00050996 | 0.044785 | SLC35A5      |
| 102158002  | 60.65630294 | 235.5545784 | -1.9573 | 0.00050797 | 0.044785 | LOC102158002 |
| 102159603  | 31.62776592 | 4.997447955 | 2.6619  | 0.00051224 | 0.044785 | LOC102159603 |
| 110255963  | 26.0389622  | 2.537107024 | 3.3594  | 0.00051009 | 0.044785 | LOC110255963 |
| 780409     | 179.2426363 | 21.10899429 | 3.086   | 0.00051525 | 0.044785 | CCL26        |
| 100522330  | 193.0975107 | 1557.023394 | -3.0114 | 0.00052823 | 0.045752 | SLC7A8       |
| 100627227  | 1646.589954 | 456.361517  | 1.8512  | 0.00053846 | 0.046476 | NPM3         |
| 100524265  | 340.1559041 | 29.36426244 | 3.5341  | 0.00054853 | 0.04718  | CXCL13       |
| 100524940  | 1105.632176 | 3630.525197 | -1.7153 | 0.00055352 | 0.047444 | LOC100524940 |
| 397195     | 2360.798695 | 299.6819444 | 2.9778  | 0.00056408 | 0.048181 | ADM          |
| 448846     | 891.1766531 | 3105.707502 | -1.8011 | 0.00056823 | 0.048368 | EHHADH       |
| Novel00365 | 37.60012025 | 1.335180448 | 4.8156  | 1.03E-07   | 6.07E-05 | -/-          |

|            |             |             |         |            |            |     |
|------------|-------------|-------------|---------|------------|------------|-----|
| Novel00382 | 0.264757499 | 81.96500331 | -8.2742 | 1.18E-07   | 6.79E-05   | -/- |
| Novel00537 | 4.632167406 | 63.42110771 | -3.7752 | 1.27E-07   | 7.14E-05   | --  |
| Novel00251 | 32.31354463 | 0.463745383 | 6.1227  | 1.13E-08   | 8.96E-06   | -/- |
| Novel00202 | 106.4137234 | 6.424173296 | 4.05    | 3.03E-08   | 2.02E-05   | -/- |
| Novel00495 | 19.49959134 | 191.7022351 | -3.2974 | 5.66E-08   | 3.50E-05   |     |
| Novel00078 | 52.24573973 | 8.139832967 | 2.6822  | 0.00027094 | 0.028828   | -/- |
| Novel00533 | 23.99244273 | 0.865259941 | 4.7933  | 0.00027043 | 0.028828   | -/- |
| Novel00482 | 0.529514999 | 24.08282943 | -5.5072 | 0.00032129 | 0.032773   | -/- |
| Novel00256 | 4.85765667  | 35.63236038 | -2.8749 | 0.0002484  | 0.027497   | --  |
| Novel00425 | 0.264757499 | 13.28355317 | -5.6488 | 0.00014213 | 0.018281   | -/- |
| Novel00679 | 5.124610259 | 38.63407584 | -2.9144 | 0.0001687  | 0.021032   | --  |
| Novel00257 | 12.67334323 | 74.41025704 | -2.5537 | 0.00017637 | 0.021759   | -/- |
| Novel00280 | 35.39557215 | 0.197669717 | 7.4843  | 0.00012338 | 0.01692    | --  |
| Novel00255 | 4.739932283 | 41.44515844 | -3.1283 | 8.12E-05   | 0.013368   | -/- |
| Novel00441 | 13.53391937 | 77.5882313  | -2.5193 | 9.64E-05   | 0.014757   | -/- |
| Novel00496 | 7.243275604 | 54.89840706 | -2.9221 | 4.59E-05   | 0.0086434  | --  |
| Novel00615 | 24.79301937 | 0.637283082 | 5.2819  | 8.11E-06   | 0.0020426  | -/- |
| Novel00535 | 39.43096643 | 2.305140059 | 4.0964  | 1.18E-05   | 0.002801   | --  |
| Novel00217 | 17.8130773  | 0           | Inf     | 9.33E-07   | 0.00039703 | --  |
| Novel00584 | 10.14141087 | 149.0529914 | -3.8775 | 1.41E-06   | 0.00051999 | -/- |

---



**Table S5.** List of genes in different gene clusters.

| Gene clusters | Gene ID    | Name         | Log2 Fold Change | P value  | Adjusted P value |
|---------------|------------|--------------|------------------|----------|------------------|
| Cluster 1     | 100738064  | PLA2G2A      | --               | 4.69E-04 | 0.042745         |
|               | 397207     | HAMP         | --               | 3.00E-06 | 0.0010156        |
|               | Novel00217 | --           | --               | 9.33E-07 | 0.00039703       |
| Cluster 2     | 100157662  | HOXD1        | 7.4242           | 3.77E-06 | 0.0011702        |
|               | 100511886  | FGFBP1       | 7.0526           | 4.39E-05 | 0.0083279        |
|               | 100518950  | FGF19        | 7.7152           | 7.64E-07 | 0.00033427       |
|               | 100522244  | SCNN1G       | 7.0292           | 9.24E-05 | 0.014491         |
|               | 110260202  | ARC          | 10.371           | 4.10E-04 | 0.039068         |
|               | 399542     | SLC5A5       | 5.9727           | 9.62E-05 | 0.014757         |
|               | 414904     | CXCL2        | 5.9852           | 2.58E-07 | 0.00012984       |
|               | Novel00251 | --           | 6.1227           | 1.13E-08 | 8.96E-06         |
| Novel00280    | --         | 7.4843       | 1.23E-04         | 0.01692  |                  |
| Cluster 3     | 595119     | OASL         | 3.6703           | 3.61E-11 | 8.10E-08         |
|               | 733625     | SFN          | 4.4655           | 4.33E-09 | 4.65E-06         |
|               | 100156489  | TGM1         | 4.3808           | 4.33E-10 | 5.63E-07         |
|               | 100157318  | APOD         | 4.1034           | 2.40E-09 | 2.69E-06         |
|               | 100510974  | COL28A1      | 3.6319           | 2.91E-10 | 4.23E-07         |
|               | 100511552  | CIB3         | 4.0993           | 4.27E-04 | 0.040201         |
|               | 100512452  | GALNT12      | 3.4786           | 8.69E-08 | 5.23E-05         |
|               | 100515798  | ARL14        | 3.454            | 7.87E-10 | 9.71E-07         |
|               | 100521889  | ADGRE1       | 3.8241           | 2.11E-07 | 0.00010851       |
|               | 100523844  | PIK3C2G      | 5.4259           | 2.06E-13 | 1.02E-09         |
|               | 100524265  | CXCL13       | 3.5341           | 5.49E-04 | 0.04718          |
|               | 100524951  | ACOD1        | 3.6527           | 9.09E-05 | 0.01447          |
|               | 100525396  | LOC100525396 | 3.7065           | 9.37E-11 | 1.78E-07         |
|               | 100621352  | LOC100621352 | 3.782            | 1.18E-04 | 0.016381         |
|               | 100623476  | HTR6         | 3.5284           | 3.47E-04 | 0.035045         |
|               | 100623615  | LY6D         | 4.3749           | 2.76E-05 | 0.0058324        |
|               | 100737113  | LOC100737113 | 4.3836           | 4.39E-08 | 2.85E-05         |
| 100738704     | TNIP3      | 4.6448       | 1.93E-08         | 1.32E-05 |                  |

|           |            |              |         |          |           |
|-----------|------------|--------------|---------|----------|-----------|
|           | 106505337  | LOC106505337 | 4.089   | 1.58E-08 | 1.15E-05  |
|           | 110255963  | LOC110255963 | 3.3594  | 5.10E-04 | 0.044785  |
|           | 110256469  | LOC110256469 | 4.6435  | 4.01E-05 | 0.0077267 |
|           | Novel00202 | --           | 4.05    | 3.03E-08 | 2.02E-05  |
|           | Novel00365 | --           | 4.8156  | 1.03E-07 | 6.07E-05  |
|           | Novel00533 | --           | 4.7933  | 2.70E-04 | 0.028828  |
|           | Novel00535 | --           | 4.0964  | 1.18E-05 | 0.002801  |
|           | Novel00615 | --           | 5.2819  | 8.11E-06 | 0.0020426 |
|           | 396934     | RENBP        | -1.8559 | 4.60E-04 | 0.042117  |
|           | 396998     | HPX          | -2.8031 | 3.86E-04 | 0.037623  |
|           | 397013     | PPARGC1A     | -2.4546 | 2.06E-05 | 0.0045352 |
|           | 397018     | SCARB1       | -1.7741 | 4.58E-04 | 0.042117  |
|           | 397134     | DAO          | -1.8558 | 1.87E-04 | 0.022539  |
|           | 397166     | MS4A2        | -2.6466 | 5.20E-05 | 0.0093738 |
|           | 397182     | IGFBP5       | -2.1139 | 1.83E-04 | 0.022344  |
|           | 397200     | SLC28A1      | -2.0648 | 7.62E-05 | 0.012888  |
|           | 397358     | SLC9A3       | -2.3939 | 3.72E-06 | 0.0011702 |
|           | 397373     | MYO7A        | -3.1713 | 6.32E-09 | 6.24E-06  |
|           | 397376     | SLC5A4       | -2.2354 | 3.51E-04 | 0.035218  |
|           | 397568     | CAT          | -1.8051 | 3.92E-04 | 0.037835  |
| Cluster 4 | 397639     | EPHX1        | -3.1905 | 2.08E-04 | 0.02391   |
|           | 397687     | CYP2D25      | -2.7384 | 9.38E-05 | 0.014567  |
|           | 397691     | APOA1        | -3.2846 | 1.85E-08 | 1.31E-05  |
|           | 403215     | CYP2C49      | -2.4739 | 6.85E-05 | 0.011989  |
|           | 403324     | CYP3A29      | -2.0106 | 1.62E-04 | 0.020342  |
|           | 404698     | HYAL1        | -1.9593 | 2.07E-04 | 0.02391   |
|           | 448846     | EHHADH       | -1.8011 | 5.68E-04 | 0.048368  |
|           | 497235     | SLC5A10      | -2.1669 | 8.79E-05 | 0.014147  |
|           | 654317     | NR1I3        | -3.3436 | 1.11E-05 | 0.0026914 |
|           | 692188     | APOM         | -3.5642 | 7.55E-09 | 6.90E-06  |
|           | 768107     | RGN          | -1.9949 | 2.31E-04 | 0.025982  |
|           | 100037966  | SOCS2        | -1.9708 | 1.88E-04 | 0.02257   |
|           | 100048965  | PGRMC2       | -2.0751 | 4.79E-05 | 0.008958  |

|           |          |         |          |            |
|-----------|----------|---------|----------|------------|
| 100125551 | SLC2A8   | -3.0009 | 1.37E-08 | 1.03E-05   |
| 100134962 | PHYH     | -2.7229 | 3.06E-07 | 0.00014822 |
| 100141314 | RARRES2  | -2.5859 | 0.000514 | 0.044785   |
| 100141405 | CTSZ     | -2.115  | 3.13E-05 | 0.0064922  |
| 100144410 | TPPP     | -1.9969 | 9.77E-05 | 0.014788   |
| 100144591 | CYBRD1   | -2.8291 | 1.02E-04 | 0.015013   |
| 100151780 | KCNJ13   | -2.7904 | 9.68E-05 | 0.014757   |
| 100151790 | PMM1     | -2.4907 | 4.65E-06 | 0.0013506  |
| 100151843 | SNTA1    | -2.5747 | 2.19E-06 | 0.00076002 |
| 100152247 | TP53INP2 | -2.3722 | 7.25E-06 | 0.0019097  |
| 100152368 | EGLN3    | -2.0738 | 7.33E-05 | 0.012659   |
| 100152827 | FCER1A   | -3.8051 | 8.83E-05 | 0.014147   |
| 100153155 | XCL1     | -2.9181 | 3.81E-06 | 0.0011702  |
| 100153250 | GPD1     | -3.0855 | 4.84E-05 | 0.0089677  |
| 100153752 | CLDN10   | -3.9658 | 1.03E-08 | 8.50E-06   |
| 100153917 | SLITRK6  | -2.7183 | 3.52E-05 | 0.0069272  |
| 100154506 | ENTPD5   | -2.0974 | 5.65E-05 | 0.0099617  |
| 100155159 | PYROXD2  | -2.778  | 2.62E-04 | 0.028419   |
| 100155341 | NEIL1    | -2.528  | 3.38E-06 | 0.001129   |
| 100156404 | PGF      | -3.6266 | 5.82E-07 | 0.00026583 |
| 100156419 | HOMER2   | -3.3979 | 2.11E-10 | 3.26E-07   |
| 100156756 | ACVR1C   | -3.4706 | 1.24E-05 | 0.0029128  |
| 100156914 | SLC24A4  | -1.7894 | 2.76E-04 | 0.029108   |
| 100157774 | SLC25A27 | -2.3449 | 5.55E-06 | 0.001557   |
| 100158055 | OLFML3   | -1.8663 | 2.36E-04 | 0.026392   |
| 100158214 | FLRT3    | -2.2655 | 2.45E-05 | 0.005313   |
| 100158243 | SLC16A3  | -2.4931 | 1.26E-06 | 0.00048441 |
| 100233171 | AGPAT3   | -1.8422 | 2.51E-04 | 0.027663   |
| 100294675 | DGAT2    | -3.8167 | 1.17E-04 | 0.01632    |
| 100510947 | PTGDR2   | -2.3419 | 2.32E-04 | 0.025982   |
| 100511895 | SLC25A15 | -2.161  | 3.34E-05 | 0.0068096  |
| 100512737 | SLC13A2  | -2.7472 | 1.11E-06 | 0.00044696 |
| 100512800 | SCN4B    | -2.3987 | 3.37E-05 | 0.0068096  |

---

|           |              |         |          |            |
|-----------|--------------|---------|----------|------------|
| 100513308 | TM4SF5       | -2.7003 | 5.22E-06 | 0.0014994  |
| 100514091 | OTOG         | -2.2441 | 2.44E-04 | 0.027153   |
| 100514218 | GJC2         | -3.0439 | 1.16E-06 | 0.00045493 |
| 100514493 | ATP1B3       | -1.8218 | 2.95E-04 | 0.030627   |
| 100514568 | TMEM38A      | -2.0124 | 3.90E-04 | 0.037767   |
| 100514726 | ENPP7        | -2.6943 | 8.38E-05 | 0.01361    |
| 100514743 | WIPF3        | -1.9773 | 2.82E-04 | 0.029532   |
| 100514979 | LOC100514979 | -3.0182 | 2.93E-05 | 0.0061213  |
| 100515143 | RNF207       | -2.8775 | 1.04E-04 | 0.015138   |
| 100515264 | CAMK2N1      | -2.1437 | 4.04E-05 | 0.0077267  |
| 100515408 | SHPK         | -2.3784 | 2.11E-05 | 0.0046004  |
| 100515422 | MFSD4B       | -2.0004 | 1.53E-04 | 0.019389   |
| 100515460 | USP27X       | -2.7546 | 7.09E-06 | 0.0019025  |
| 100515955 | PTPRU        | -2.2528 | 1.08E-04 | 0.015386   |
| 100516107 | LRRC3C       | -3.3882 | 3.44E-05 | 0.0069095  |
| 100516309 | GDPD2        | -3.7889 | 3.12E-10 | 4.27E-07   |
| 100516363 | NAT8         | -3.2044 | 1.40E-06 | 0.00051999 |
| 100516578 | CCDC80       | -2.5001 | 2.09E-06 | 0.00073866 |
| 100516761 | SLC35A5      | -1.8212 | 5.10E-04 | 0.044785   |
| 100517307 | SLC6A4       | -3.4833 | 2.07E-09 | 2.43E-06   |
| 100519115 | ADAMTS16     | -3.2013 | 1.28E-05 | 0.0029254  |
| 100519179 | USP51        | -3.2121 | 2.59E-04 | 0.028256   |
| 100519529 | ABCD1        | -2.2044 | 3.19E-04 | 0.032636   |
| 100519539 | KLHL3        | -2.4466 | 1.10E-04 | 0.015553   |
| 100520068 | PCDH12       | -2.8675 | 4.84E-07 | 0.00022522 |
| 100521274 | FAM131C      | -2.1093 | 8.33E-05 | 0.01361    |
| 100521912 | WNT11        | -2.6049 | 7.72E-07 | 0.00033427 |
| 100522021 | LRRC66       | -1.8321 | 4.81E-04 | 0.043237   |
| 100522330 | SLC7A8       | -3.0114 | 5.28E-04 | 0.045752   |
| 100522516 | GLYCTK       | -2.7665 | 4.77E-04 | 0.043099   |
| 100522832 | GPR156       | -2.9332 | 2.62E-05 | 0.0056178  |
| 100522927 | CGREF1       | -2.4998 | 3.55E-06 | 0.0011539  |
| 100522981 | HOOK2        | -1.8231 | 4.48E-04 | 0.041452   |

---

|           |              |         |          |            |
|-----------|--------------|---------|----------|------------|
| 100523209 | COL7A1       | -2.329  | 4.59E-06 | 0.0013497  |
| 100523389 | SLC37A2      | -2.2322 | 2.03E-05 | 0.0045111  |
| 100523600 | PCP4L1       | -3.1018 | 5.72E-06 | 0.0015865  |
| 100524747 | DBP          | -2.5924 | 1.64E-06 | 0.00058677 |
| 100524750 | CYP2J34      | -1.9876 | 7.16E-05 | 0.012442   |
| 100524940 | LOC100524940 | -1.7153 | 5.54E-04 | 0.047444   |
| 100622126 | CX3CR1       | -3.3691 | 3.58E-04 | 0.035823   |
| 100622227 | LOC100622227 | -3.5546 | 4.42E-04 | 0.041222   |
| 100622375 | SHANK3       | -1.946  | 1.42E-04 | 0.018281   |
| 100623097 | SLC30A10     | -3.8052 | 1.62E-10 | 2.67E-07   |
| 100623751 | RPS6KA5      | -2.2641 | 5.20E-05 | 0.0093738  |
| 100623809 | TMC5         | -1.8204 | 3.63E-04 | 0.036033   |
| 100624476 | PRDM16       | -2.2939 | 5.39E-06 | 0.0015297  |
| 100624487 | SLC2A10      | -2.1164 | 3.94E-04 | 0.037859   |
| 100624671 | CMTM8        | -1.9513 | 4.08E-04 | 0.039007   |
| 100624791 | PLXNA2       | -1.7668 | 4.13E-04 | 0.039085   |
| 100625759 | SMIM1        | -2.5147 | 1.32E-04 | 0.017685   |
| 100625807 | LCT          | -2.1887 | 2.02E-04 | 0.023531   |
| 100625897 | LOC100625897 | -2.678  | 1.55E-07 | 8.52E-05   |
| 100626343 | ABCD3        | -2.2627 | 1.04E-04 | 0.015138   |
| 100626731 | LOC100626731 | -3.0813 | 1.57E-06 | 0.00057029 |
| 100627632 | ZKSCAN7      | -2.3321 | 1.08E-04 | 0.015386   |
| 100627912 | GDPD5        | -2.1969 | 7.57E-05 | 0.012888   |
| 100628009 | XYLB         | -1.7803 | 4.61E-04 | 0.042117   |
| 100628018 | SLC46A1      | -3.7775 | 1.31E-10 | 2.31E-07   |
| 100736742 | GJA8         | -2.2764 | 2.08E-04 | 0.02391    |
| 100737517 | SLC40A1      | -2.094  | 1.06E-04 | 0.015278   |
| 100737774 | LRRC17       | -3.4606 | 1.11E-05 | 0.0026914  |
| 100738133 | LOC100738133 | -2.2429 | 2.13E-04 | 0.024242   |
| 100738360 | PDIA2        | -3.8302 | 9.90E-12 | 2.44E-08   |
| 100739671 | ESM1         | -2.552  | 7.49E-06 | 0.0019473  |
| 100739719 | LOC100739719 | -2.8409 | 4.82E-04 | 0.043237   |
| 100739839 | SPATC1       | -3.2378 | 1.01E-06 | 0.00041396 |

---

|            |              |         |          |            |
|------------|--------------|---------|----------|------------|
| 102158002  | LOC102158002 | -1.9573 | 5.08E-04 | 0.044785   |
| 102159476  | LOC102159476 | -2.6999 | 9.99E-05 | 0.014949   |
| 102159800  | MVB12B       | -1.867  | 2.94E-04 | 0.030627   |
| 102161066  | LOC102161066 | -2.8346 | 1.34E-06 | 0.00050976 |
| 102163819  | MS4A10       | -2.4276 | 2.62E-04 | 0.028419   |
| 102164363  | LOC102164363 | -3.6501 | 1.80E-05 | 0.0040732  |
| 102164898  | SEC16B       | -1.8442 | 3.13E-04 | 0.0322     |
| 102165025  | LOC102165025 | -3.0699 | 7.75E-05 | 0.013013   |
| 102165634  | LOC102165634 | -2.0406 | 1.01E-04 | 0.014982   |
| 102167936  | LOC102167936 | -3.2745 | 2.01E-04 | 0.023477   |
| 106505853  | LOC106505853 | -2.6251 | 3.84E-06 | 0.0011702  |
| 106506279  | LOC106506279 | -3.2783 | 1.36E-04 | 0.018039   |
| 106509607  | LOC106509607 | -2.2261 | 1.02E-04 | 0.015005   |
| 110255503  | LOC110255503 | -2.7795 | 4.90E-05 | 0.0089677  |
| 110256050  | MMP28        | -1.901  | 4.38E-04 | 0.041116   |
| 110256150  | KCNJ12       | -3.1026 | 9.20E-09 | 8.11E-06   |
| 110256586  | LOC110256586 | -2.5691 | 1.77E-04 | 0.021759   |
| 110257275  | LOC110257275 | -3.2599 | 2.81E-07 | 0.00013852 |
| 110257555  | LOC110257555 | -3.0234 | 8.03E-05 | 0.013368   |
| 110259489  | TIFAB        | -2.5022 | 4.87E-05 | 0.0089677  |
| 110259946  | LOC110259946 | -3.3912 | 1.11E-04 | 0.015609   |
| 110260714  | ETFBKMT      | -2.0256 | 3.82E-04 | 0.037444   |
| 110260940  | LOC110260940 | -2.7121 | 1.19E-04 | 0.01642    |
| 110262031  | LOC110262031 | -2.5289 | 2.79E-06 | 0.00095486 |
| Novel00255 | --           | -3.1283 | 8.12E-05 | 0.013368   |
| Novel00256 | --           | -2.8749 | 2.48E-04 | 0.027497   |
| Novel00257 | --           | -2.5537 | 1.76E-04 | 0.021759   |
| Novel00441 | --           | -2.5193 | 9.64E-05 | 0.014757   |
| Novel00495 | --           | -3.2974 | 5.66E-08 | 3.50E-05   |
| Novel00496 | --           | -2.9221 | 4.59E-05 | 0.0086434  |
| Novel00537 | --           | -3.7752 | 1.27E-07 | 7.14E-05   |
| Novel00584 | --           | -3.8775 | 1.41E-06 | 0.00051999 |
| Novel00679 | --           | -2.9144 | 1.69E-04 | 0.021032   |

---

---

|           |           |              |        |          |            |
|-----------|-----------|--------------|--------|----------|------------|
|           | 396645    | IRF8         | 1.9442 | 1.95E-04 | 0.023091   |
|           | 396764    | SLC11A1      | 2.6545 | 3.88E-04 | 0.037699   |
|           | 396900    | AMCF-II      | 2.2288 | 3.32E-05 | 0.0068096  |
|           | 397195    | ADM          | 2.9778 | 5.64E-04 | 0.048181   |
|           | 397508    | SELE         | 2.9728 | 4.93E-04 | 0.044059   |
|           | 397645    | SAT1         | 1.9116 | 1.72E-04 | 0.021373   |
|           | 399532    | FABP3        | 2.1213 | 5.54E-05 | 0.0098341  |
|           | 494561    | HK2          | 2.6892 | 9.90E-07 | 0.00041396 |
|           | 595111    | KLF4         | 1.8681 | 2.01E-04 | 0.023477   |
|           | 733608    | S100A6       | 2.918  | 1.25E-08 | 9.65E-06   |
|           | 780409    | CCL26        | 3.086  | 5.15E-04 | 0.044785   |
|           | 100037938 | CD14         | 2.0086 | 1.55E-04 | 0.019506   |
|           | 100126286 | KRT18        | 1.8058 | 3.63E-04 | 0.036033   |
|           | 100127358 | IFITM1       | 2.2909 | 8.61E-06 | 0.0021393  |
|           | 100135678 | PDE6C        | 2.7964 | 1.12E-06 | 0.00044696 |
|           | 100145895 | ISG15        | 2.3519 | 6.58E-06 | 0.0018039  |
| Cluster 5 | 100152428 | LOC100152428 | 2.8437 | 2.73E-04 | 0.02891    |
|           | 100153504 | F13A1        | 2.2859 | 2.13E-04 | 0.024242   |
|           | 100155467 | IFIT2        | 1.9954 | 1.47E-04 | 0.018837   |
|           | 100155893 | ARG2         | 2.4526 | 3.68E-06 | 0.0011702  |
|           | 100156455 | TC2N         | 1.8278 | 3.48E-04 | 0.035045   |
|           | 100156922 | MAT1A        | 3.0554 | 1.96E-07 | 0.0001032  |
|           | 100157026 | MTRF2        | 2.0994 | 9.96E-05 | 0.014949   |
|           | 100157138 | PNP          | 3.1261 | 1.25E-05 | 0.0029128  |
|           | 100157844 | PIM1         | 1.8851 | 2.67E-04 | 0.028636   |
|           | 100158162 | ATP10A       | 2.0276 | 1.32E-04 | 0.017685   |
|           | 100187577 | LRP8         | 2.1487 | 7.62E-05 | 0.012888   |
|           | 100312960 | ANXA4        | 2.6891 | 6.41E-07 | 0.00028767 |
|           | 100316849 | ZFP36        | 1.9582 | 2.18E-04 | 0.024679   |
|           | 100511161 | PLA2G3       | 1.954  | 3.31E-04 | 0.033646   |
|           | 100511370 | HSH2D        | 2.35   | 7.27E-06 | 0.0019097  |
|           | 100512564 | FAM117B      | 2.2074 | 2.75E-05 | 0.0058324  |
|           | 100512686 | IRS1         | 2.6305 | 1.39E-04 | 0.018281   |

---

|            |              |        |          |            |
|------------|--------------|--------|----------|------------|
| 100514482  | AGR2         | 1.8933 | 1.84E-04 | 0.022344   |
| 100515339  | KRT19        | 2.2446 | 5.02E-04 | 0.04459    |
| 100515639  | PCDH19       | 2.0955 | 1.53E-04 | 0.019389   |
| 100515902  | LOC100515902 | 2.9496 | 1.42E-04 | 0.018281   |
| 100516755  | ETV4         | 2.2016 | 3.47E-05 | 0.0069167  |
| 100518544  | IFITM3       | 1.918  | 1.87E-04 | 0.022539   |
| 100520717  | YPEL4        | 2.4978 | 4.48E-04 | 0.041452   |
| 100520832  | LOC100520832 | 3.152  | 1.92E-04 | 0.022899   |
| 100521587  | ECEL1        | 3.1114 | 3.77E-05 | 0.0073318  |
| 100522112  | GCNT3        | 2.2081 | 3.54E-05 | 0.0069272  |
| 100522261  | PGM2         | 1.8526 | 3.77E-04 | 0.037177   |
| 100523320  | SOWAHB       | 2.0726 | 3.01E-04 | 0.031112   |
| 100622156  | TNFAIP3      | 2.2065 | 4.11E-04 | 0.039068   |
| 100622336  | CSF3R        | 2.9813 | 1.96E-04 | 0.023184   |
| 100622812  | DUSP2        | 2.0512 | 9.28E-05 | 0.014491   |
| 100623590  | PKP1         | 2.4297 | 8.09E-05 | 0.013368   |
| 100624628  | LOC100624628 | 2.4038 | 5.01E-04 | 0.04459    |
| 100625050  | EPSTI1       | 2.0801 | 9.14E-05 | 0.01447    |
| 100625277  | UPP1         | 2.6795 | 3.90E-07 | 0.00018496 |
| 100627227  | NPM3         | 1.8512 | 5.38E-04 | 0.046476   |
| 100627807  | RBM3         | 2.6714 | 8.09E-06 | 0.0020426  |
| 100738302  | CEACAM19     | 2.1851 | 1.91E-05 | 0.0042847  |
| 100739218  | LOC100739218 | 1.9993 | 1.26E-04 | 0.017144   |
| 102159603  | LOC102159603 | 2.6619 | 5.12E-04 | 0.044785   |
| 106505478  | LOC106505478 | 3.1482 | 1.00E-08 | 8.50E-06   |
| 110255508  | CER1         | 2.2977 | 1.40E-04 | 0.018281   |
| 110256043  | LOC110256043 | 2.4585 | 4.46E-06 | 0.001327   |
| 110256498  | CBS          | 2.8371 | 1.14E-05 | 0.0027408  |
| 110256820  | LOC110256820 | 2.2842 | 2.81E-04 | 0.029532   |
| 110259210  | MUC5AC       | 2.6304 | 1.27E-04 | 0.01728    |
| 110260118  | SOWAHC       | 1.8868 | 4.75E-04 | 0.043099   |
| 110260216  | LOC110260216 | 3.2267 | 1.42E-04 | 0.018281   |
| Novel00078 | --           | 2.6822 | 2.71E-04 | 0.028828   |

---



---

|           |            |              |         |          |           |
|-----------|------------|--------------|---------|----------|-----------|
|           | 397677     | FOLH1B       | -5.6844 | 9.18E-11 | 1.78E-07  |
|           | 403104     | CYP2B22      | -8.8192 | 2.79E-15 | 3.45E-11  |
|           | 406187     | APOC3        | -4.4897 | 7.14E-15 | 5.87E-11  |
|           | 414380     | DIO1         | -6.0211 | 1.10E-19 | 2.71E-15  |
|           | 100126844  | GATM         | -4.3639 | 4.99E-08 | 3.16E-05  |
|           | 100144620  | AQP10        | -4.197  | 3.55E-06 | 0.0011539 |
|           | 100155204  | ZBBX         | -4.5526 | 2.25E-12 | 6.16E-09  |
|           | 100155871  | SLC16A9      | -5.9237 | 4.43E-04 | 0.041222  |
|           | 100157065  | ASAH2        | -4.2656 | 2.57E-04 | 0.028168  |
|           | 100157319  | SDR16C5      | -4.9255 | 2.09E-12 | 6.16E-09  |
|           | 100171400  | TRPV6        | -5.004  | 3.99E-06 | 0.0012014 |
|           | 100192320  | BCO1         | -6.1683 | 5.52E-05 | 0.0098341 |
|           | 100515970  | OSBP2        | -4.2461 | 5.13E-13 | 2.11E-09  |
|           | 100519006  | DUSP9        | -5.5588 | 6.85E-06 | 0.0018568 |
| Cluster 6 | 100519488  | MOV10L1      | -4.2825 | 2.67E-04 | 0.028636  |
|           | 100523325  | ASB4         | -4.6386 | 8.67E-06 | 0.0021393 |
|           | 100620627  | LOC100620627 | -4.9919 | 6.64E-09 | 6.31E-06  |
|           | 100625192  | GCKR         | -4.0522 | 1.73E-07 | 9.31E-05  |
|           | 100627655  | LOC100627655 | -5.9322 | 4.89E-09 | 5.03E-06  |
|           | 100738062  | ACOT12       | -4.2637 | 3.81E-04 | 0.037444  |
|           | 102161637  | LOC102161637 | -4.6253 | 1.27E-05 | 0.0029254 |
|           | 106505256  | LOC106505256 | -4.2317 | 7.73E-06 | 0.001988  |
|           | 106508195  | TAS2R40      | -5.7493 | 1.05E-04 | 0.01516   |
|           | 110255314  | LOC110255314 | -4.4512 | 8.44E-13 | 2.98E-09  |
|           | 110259705  | TH           | -6.4225 | 1.33E-04 | 0.017685  |
|           | 110261001  | LOC110261001 | -6.4452 | 3.15E-14 | 1.94E-10  |
|           | Novel00382 | --           | -8.2742 | 1.18E-07 | 6.79E-05  |
|           | Novel00425 | --           | -5.6488 | 1.42E-04 | 0.018281  |
|           | Novel00482 | --           | -5.5072 | 3.21E-04 | 0.032773  |

---

**Table S6.** Gene Ontology analyses for differential expression genes.

| GO accession | Description                                                 | Term type          | P value    | Gene ID                                                                                                                                                                                                                                                                                                                                                                                                                                                                                                                                                                        |
|--------------|-------------------------------------------------------------|--------------------|------------|--------------------------------------------------------------------------------------------------------------------------------------------------------------------------------------------------------------------------------------------------------------------------------------------------------------------------------------------------------------------------------------------------------------------------------------------------------------------------------------------------------------------------------------------------------------------------------|
| GO:0008009   | chemokine activity                                          | Molecular function | 1.21E-05   | 780409,396900,100525396,414904,100524265, 100153155                                                                                                                                                                                                                                                                                                                                                                                                                                                                                                                            |
| GO:0042379   | chemokine receptor binding                                  | Molecular function | 1.21E-05   | 100524265,396900,100525396,414904,780409, 100153155                                                                                                                                                                                                                                                                                                                                                                                                                                                                                                                            |
| GO:0001664   | G-protein coupled receptor binding                          | Molecular function | 1.74E-05   | 100524265,100525396,396900,414904,780409, 100153155,397200<br>595119,110259210,100520717,100153504,399542,100157026,<br>100627632,414380,397687,100144591,448846,100626731,                                                                                                                                                                                                                                                                                                                                                                                                    |
| GO:0055114   | oxidation-reduction process                                 | Biological process | 0.00026513 | 100152368,100153250,397134,397013,403215,403324,403104,10051730<br>7,100625192,397568,100524940,100155159,397166,100738360,1005247<br>50,100516578,100515970,110259705                                                                                                                                                                                                                                                                                                                                                                                                         |
| GO:0005335   | serotonin:sodium symporter activity                         | Molecular function | 0.00040681 | 100517307, 102164898                                                                                                                                                                                                                                                                                                                                                                                                                                                                                                                                                           |
| GO:0008504   | monoamine transmembrane transporter activity                | Molecular function | 0.00040681 | 100517307, 102164898                                                                                                                                                                                                                                                                                                                                                                                                                                                                                                                                                           |
| GO:0015222   | serotonin transmembrane transporter activity                | Molecular function | 0.00040681 | 100517307, 102164898<br>100623590,100518544,100522244,110256043,100737113,100152428,100<br>126286,399542,100515339,397358,100737517,100626343,100153917,10<br>0515422,102164898,397013,100523389,100624487,100155871,10062801<br>8,397376,397691,100620627,100514568,406187,100516578,100623097,1<br>00125551,100514493,448846,110256150,497235,100158243,100522330,<br>100512737,100151780,100156419,100171400,100517307,100515970,100<br>519529,100516761,100624671,100156914<br>100623590,100518544,100522244,110256043,100737113,100152428,100<br>126286,399542,100515339, |
| GO:1901618   | organic hydroxy compound transmembrane transporter activity | Molecular function | 0.00040681 | 397358,100737517,100626343,100153917,100515422,102164898,39701<br>3,100523389,100624487,100155871,100628018,397376,397691,1006206                                                                                                                                                                                                                                                                                                                                                                                                                                              |
| GO:1902578   | single-organism localization                                | Biological process | 0.00045122 |                                                                                                                                                                                                                                                                                                                                                                                                                                                                                                                                                                                |

|            |                                                |                    |            |                                                                                                                                                                                                                                                                                                                                                                                                                                                                                                                                                        |
|------------|------------------------------------------------|--------------------|------------|--------------------------------------------------------------------------------------------------------------------------------------------------------------------------------------------------------------------------------------------------------------------------------------------------------------------------------------------------------------------------------------------------------------------------------------------------------------------------------------------------------------------------------------------------------|
|            |                                                |                    |            | 27,100514568,406187,100516578,100623097,100125551,100514493,448846,110256150,497235,100158243,100522330,100512737,100151780,100156419,100171400,100517307,100515970,100519529,100516761,100624671,100156914                                                                                                                                                                                                                                                                                                                                            |
|            |                                                |                    |            | 399542,100515339,100737113,110256043,100152428,100126286,100518544,100522244,100623590, 100515970,100519529,100156914,100516761,100624671,100151780,100156419,100517307,100171400,497235,100158243,100512737,100522330,110256150,100514493,448846,100620627,100514568,397376,397691,100125551,100623097,406187,100516578,100155871,100628018,102164898,397013,100624487,100523389,100737517,100626343,397358,100515422                                                                                                                                 |
| GO:0044765 | single-organism transport                      | Biological process | 0.00049795 | 171400,497235,100158243,100512737,100522330,110256150,100514493,448846,100620627,100514568,397376,397691,100125551,100623097,406187,100516578,100155871,100628018,102164898,397013,100624487,100523389,100737517,100626343,397358,100515422                                                                                                                                                                                                                                                                                                            |
| GO:0005125 | cytokine activity                              | Molecular function | 0.0006886  | 414904,396900,100525396,100524265,780409, 100153155399542,100157026,595119,110259210,100153504,100520717,100157319,403104,100625192,397568,100738360,100155159,397166,100524940,100516578,100524750,100625807,110259705,100515970,414380,100627632,448846,397687,100626731,100152368,397134,100153250,403324,100625897,403215399542,100623590,100152428,100516578,100623097,100125551,100156914,397376,100519529,100620627,100171400,100628018,100155871,100512737,100522330,100624487,100523389,100158243,497235,100515422,397358,100626343,100737517 |
| GO:0016491 | oxidoreductase activity                        | Molecular function | 0.00085566 | 0516578,100524750,100625807,110259705,100515970,414380,100627632,448846,397687,100626731,100152368,397134,100153250,403324,100625897,403215399542,100623590,100152428,100516578,100623097,100125551,100156914,397376,100519529,100620627,100171400,100628018,100155871,100512737,100522330,100624487,100523389,100158243,497235,100515422,397358,100626343,100737517                                                                                                                                                                                   |
| GO:0055085 | transmembrane transport                        | Biological process | 0.0015613  | 397645,100156489,100153504,100521587,100233171,106506279,100514493,100516363,100294675                                                                                                                                                                                                                                                                                                                                                                                                                                                                 |
| GO:0016746 | transferase activity, transferring acyl groups | Molecular function | 0.0017606  |                                                                                                                                                                                                                                                                                                                                                                                                                                                                                                                                                        |

|            |                                                                                                              |                    |           |                                                                                                                                                                                                                                                                                                                         |
|------------|--------------------------------------------------------------------------------------------------------------|--------------------|-----------|-------------------------------------------------------------------------------------------------------------------------------------------------------------------------------------------------------------------------------------------------------------------------------------------------------------------------|
| GO:0020037 | heme binding                                                                                                 | Molecular function | 0.0020672 | 403324,403215,100519529,100524750,100524940,397568,397687,403104                                                                                                                                                                                                                                                        |
| GO:0046906 | tetrapyrrole binding                                                                                         | Molecular function | 0.0028868 | 100524940,100524750,100519529,403215,403324,397687,403104,397568                                                                                                                                                                                                                                                        |
| GO:0005126 | cytokine receptor binding                                                                                    | Molecular function | 0.0028969 | 100524265,414904,396900,100525396,780409 2 100153155,100156914                                                                                                                                                                                                                                                          |
| GO:0003906 | DNA-(apurinic or apyrimidinic site) lyase activity                                                           | Molecular function | 0.004691  | 100516761,100155341                                                                                                                                                                                                                                                                                                     |
| GO:0005215 | transporter activity                                                                                         | Molecular function | 0.004932  | 100518544,100522244,399542,396764,100152428,100623590,497235,100192320,100522330,100512737,110256150,100519529,100516761,100624671,100151780,100171400,100517307,100233171,102164898,397013,100144620,100624487,100523389,397358,100737517,100626343,397376,100620627,100514568,100516578,100623097,100125551,100628018 |
| GO:0008519 | ammonium transmembrane transporter activity                                                                  | Molecular function | 0.0067175 | 102164898,100517307                                                                                                                                                                                                                                                                                                     |
| GO:0019050 | suppression by virus of host apoptotic process                                                               | Biological process | 0.0068383 | 100624487,100513308                                                                                                                                                                                                                                                                                                     |
| GO:0033668 | negative regulation by symbiont of host apoptotic process                                                    | Biological process | 0.0068383 | 100624487,100513308                                                                                                                                                                                                                                                                                                     |
| GO:0052041 | negative regulation by symbiont of host programmed cell death                                                | Biological process | 0.0068383 | 100624487,100513308                                                                                                                                                                                                                                                                                                     |
| GO:0052490 | negative regulation by organism of programmed cell death in other organism involved in symbiotic interaction | Biological process | 0.0068383 | 100624487,100513308                                                                                                                                                                                                                                                                                                     |
| GO:0019054 | modulation by virus of host process                                                                          | Biological process | 0.0076563 | 110260940,100513308,100624487                                                                                                                                                                                                                                                                                           |
| GO:0044068 | modulation by symbiont of host cellular process                                                              | Biological process | 0.0076563 | 100513308,110260940,100624487                                                                                                                                                                                                                                                                                           |
| GO:0016705 | oxidoreductase activity, acting on paired donors, with incorporation or reduction of molecular oxygen        | Molecular function | 0.0078364 | 403104,397687,100524750,100524940,403324,403215,110259705                                                                                                                                                                                                                                                               |

|            |                                                                        |                    |           |                                                                                                                                                                                                                                                                                                                                                                                                                                                                                                                                                                                                                                                                                                                                                                                                                                                                                                                                                                                                                                  |
|------------|------------------------------------------------------------------------|--------------------|-----------|----------------------------------------------------------------------------------------------------------------------------------------------------------------------------------------------------------------------------------------------------------------------------------------------------------------------------------------------------------------------------------------------------------------------------------------------------------------------------------------------------------------------------------------------------------------------------------------------------------------------------------------------------------------------------------------------------------------------------------------------------------------------------------------------------------------------------------------------------------------------------------------------------------------------------------------------------------------------------------------------------------------------------------|
| GO:0006858 | extracellular transport                                                | Biological process | 0.0082705 | 100515339,100126286                                                                                                                                                                                                                                                                                                                                                                                                                                                                                                                                                                                                                                                                                                                                                                                                                                                                                                                                                                                                              |
| GO:0016855 | racemase and epimerase activity, acting on amino acids and derivatives | Molecular function | 0.0084302 | 110259210, 448846                                                                                                                                                                                                                                                                                                                                                                                                                                                                                                                                                                                                                                                                                                                                                                                                                                                                                                                                                                                                                |
| GO:0036361 | racemase activity, acting on amino acids and derivatives               | Molecular function | 0.0084302 | 110259210, 448846                                                                                                                                                                                                                                                                                                                                                                                                                                                                                                                                                                                                                                                                                                                                                                                                                                                                                                                                                                                                                |
| GO:0003824 | catalytic activity                                                     | Molecular function | 0.00885   | 100156922,100511370,100522112,100156489,100737113,100135678,100152428,100622812,100523844,397645,100625277,100511161,100623590,100520717,100153504,110259210,595119,733625,494561,399542,100157844,100515798,100126286,100522261,100510974,100738704,100521587,100157138,100157026,100524951,100521889,100622336,396645,100621352,100516309,100519529,100156914,100155159,100519179,100514743,100625192,100233171,100628009,110256050,100519115,106509607,100515955,102161066,100514726,100523209,100515143,100523325,100141405,106506279,448846,100514493,397691,397166,100516578,100625807,100524750,100156756,100157319,397373,100516363,100154506,403324,100625897,100515460,100152247,100294675,100519488,100626343,414380,397687,100515970,100519006,100516761,100151780,397568,100156419,404698,403215,106505256,100153250,397134,100627912,100516107,100626731,100623751,100627632,100151790,110259705,100514568,110260714,100738360,100524940,100144410,100157065,403104,100511895,397013,100152368,100515408,100155341 |
| GO:0019988 | charged-tRNA amino acid modification                                   | Biological process | 0.0093132 | 100622812, 100519006                                                                                                                                                                                                                                                                                                                                                                                                                                                                                                                                                                                                                                                                                                                                                                                                                                                                                                                                                                                                             |
| GO:0043399 | tRNA A64-2'-O-ribosylphosphate transferase activity                    | Molecular function | 0.0093132 | 100622812, 100519006                                                                                                                                                                                                                                                                                                                                                                                                                                                                                                                                                                                                                                                                                                                                                                                                                                                                                                                                                                                                             |

---

**Table S7.** Pathway analyses for differentially expressed genes.

| Term                                        | Database     | ID       | P-Value     | Gene ID                                                                                                                                                                                                                                                                                              |
|---------------------------------------------|--------------|----------|-------------|------------------------------------------------------------------------------------------------------------------------------------------------------------------------------------------------------------------------------------------------------------------------------------------------------|
| Linoleic acid metabolism                    | KEGG PATHWAY | ssc00591 | 0.000278519 | 100524940 403324 100511161 100524750 403215                                                                                                                                                                                                                                                          |
| Mineral absorption                          | KEGG PATHWAY | ssc04978 | 0.00086121  | 100144591 396764 100514493 100171400 100737517                                                                                                                                                                                                                                                       |
| Galactose metabolism                        | KEGG PATHWAY | ssc00052 | 0.001567163 | 100625807 494561 100522261 100625897                                                                                                                                                                                                                                                                 |
| Retinol metabolism                          | KEGG PATHWAY | ssc00830 | 0.002408319 | 100192320 403324 100157319 403104 403215                                                                                                                                                                                                                                                             |
| Metabolic pathways                          | KEGG PATHWAY | ssc01100 | 0.002837742 | 100514726 768107 100294675 100151790 100522261 100625277 100628009 404698 403324 100511161 100625807 100157065 100522112 110259705 397645 100126844 494561 100524750 100625897 403104 100156922 100522516 100233171 100157138 100523844 100192320 403215 100524940 100155893 100512452 397677 397134 |
| Serotonergic synapse                        | KEGG PATHWAY | ssc04726 | 0.002904062 | 403215 100524940 110259705 397687 100517307 100623476 100524750                                                                                                                                                                                                                                      |
| Fat digestion and absorption                | KEGG PATHWAY | ssc04975 | 0.002986019 | 100294675 100511161 397018 397691                                                                                                                                                                                                                                                                    |
| Arachidonic acid metabolism                 | KEGG PATHWAY | ssc00590 | 0.004192787 | 100524940 100511161 100524750 403104 403215                                                                                                                                                                                                                                                          |
| Aldosterone-regulated sodium reabsorption   | KEGG PATHWAY | ssc04960 | 0.005527373 | 100512686 100514493 733625 100522244                                                                                                                                                                                                                                                                 |
| Carbohydrate digestion and absorption       | KEGG PATHWAY | ssc04973 | 0.005979542 | 100625807 494561 100514493 100625897                                                                                                                                                                                                                                                                 |
| Vitamin digestion and absorption            | KEGG PATHWAY | ssc04977 | 0.006996254 | 397677 397018 397691                                                                                                                                                                                                                                                                                 |
| Chemokine signaling pathway                 | KEGG PATHWAY | ssc04062 | 0.008410048 | 100524265 414904 780409 396900 100153155 100525396 110256043 100622126                                                                                                                                                                                                                               |
| Asthma                                      | KEGG PATHWAY | ssc05310 | 0.00869264  | 110255503 100152827 397166                                                                                                                                                                                                                                                                           |
| Amino sugar and nucleotide sugar metabolism | KEGG PATHWAY | ssc00520 | 0.009843896 | 494561 396934 100151790 100522261                                                                                                                                                                                                                                                                    |

**Table S8.** The full set of significant motif occurrences.

| Gene clusters | Gene ID   | Symbol       | TF    | Strand | Start | End  | p-value  | q-value | Matched Sequence |
|---------------|-----------|--------------|-------|--------|-------|------|----------|---------|------------------|
| Cluster 3     | 100521889 | ADGRE1       | IRF8  | -      | 852   | 865  | 7.20E-07 | 0.0038  | CTGAAACTGAAACA   |
|               | 100521889 | ADGRE1       | IRF8  | -      | 858   | 871  | 1.79E-05 | 0.0477  | AAAAAACTGAAACT   |
|               | 100510974 | COL28A1      | IRF8  | -      | 1979  | 1992 | 2.10E-06 | 0.0106  | CTGAAAGTGAAACA   |
|               | 100524951 | ACOD1        | IRF8  | +      | 1733  | 1746 | 7.71E-06 | 0.041   | CCAAAACCTGAAAGC  |
|               | 100145895 | ISG15        | IRF8  | +      | 2070  | 2083 | 5.91E-07 | 0.00317 | AGGAAACCGAAACT   |
| Cluster 5     | 100145895 | ISG15        | IRF8  | +      | 1836  | 1849 | 5.94E-06 | 0.0159  | TGGAAAGTGAAAGT   |
|               | 100145895 | ISG15        | IRF8  | -      | 2090  | 2103 | 1.53E-05 | 0.0269  | CCGAAATCGAAATC   |
|               | 100145895 | ISG15        | IRF8  | +      | 2076  | 2089 | 2.00E-05 | 0.0269  | CCGAAACTGAAGCC   |
|               | 110256043 | LOC110256043 | IRF8  | +      | 58    | 71   | 1.49E-06 | 0.00798 | AAGAAACCGAAAGC   |
|               | 100512686 | IRS1         | IRF8  | +      | 692   | 705  | 4.94E-06 | 0.0206  | CTGAAACTGAAATC   |
| Cluster 4     | 595111    | KLF4         | IRF8  | +      | 928   | 941  | 9.12E-06 | 0.049   | TAGAAAGCGATACC   |
|               | 397013    | PPARGC1A     | IRF8  | -      | 51    | 64   | 1.39E-06 | 0.00747 | AGGAAACTGAAACT   |
|               | 110256586 | LOC110256586 | IRF8  | +      | 934   | 947  | 2.50E-06 | 0.0127  | CTGAAACCGAAATC   |
|               | 100626731 | LOC100626731 | IRF8  | +      | 996   | 1009 | 2.70E-06 | 0.0145  | TTGAAACCGAAATC   |
|               | 100519539 | KLHL3        | IRF8  | -      | 2454  | 2467 | 6.25E-06 | 0.0312  | ATGAAACTGATACA   |
| Cluster 5     | 100517307 | SLC6A4       | IRF8  | +      | 2282  | 2295 | 8.60E-06 | 0.0462  | GAGAAAGCGATACT   |
|               | 110260714 | ETFBKMT      | IRF8  | +      | 12    | 25   | 8.73E-06 | 0.0466  | ATAAAAGCGAAACT   |
|               | 100625897 | LOC100625897 | IRF8  | +      | 1460  | 1473 | 9.00E-06 | 0.0466  | CAGATACTGAAACC   |
|               | 100520717 | YPEL4        | NFIL3 | +      | 1684  | 1694 | 2.25E-06 | 0.0121  | TTATGTAATGT      |
|               | 397166    | MS4A2        | NFIL3 | +      | 710   | 720  | 2.25E-06 | 0.011   | TTATGTAATGT      |
| Cluster 4     | 448846    | EHHADH       | NFIL3 | -      | 1628  | 1638 | 3.91E-06 | 0.021   | TTATGTAATAT      |
|               | 100233171 | AGPAT3       | NFIL3 | +      | 513   | 523  | 3.91E-06 | 0.021   | TTATGTAATAT      |
|               | 100156419 | HOMER2       | NFIL3 | -      | 2291  | 2301 | 4.66E-06 | 0.0251  | TTACGTAACCT      |
| Cluster 6     | 100522021 | LRRC66       | NFIL3 | +      | 2170  | 2180 | 5.42E-06 | 0.0268  | TTATGTAATCT      |
|               | 100625192 | GCKR         | NFIL3 | +      | 2358  | 2368 | 4.36E-06 | 0.0234  | TTATGTAACCT      |
|               | 100518950 | FGF19        | KLF4  | +      | 825   | 835  | 4.21E-06 | 0.019   | CCACACCCAGG      |
| Cluster 2     | 399542    | SLC5A5       | KLF4  | +      | 113   | 123  | 4.52E-06 | 0.022   | CCACACCCACG      |
|               | 110260202 | ARC          | KLF4  | +      | 950   | 960  | 7.62E-06 | 0.0308  | CCACACCCATT      |
|               | 100518950 | FGF19        | KLF4  | -      | 1924  | 1934 | 1.28E-05 | 0.028   | ACACACCCACT      |
| Cluster 3     | 110260202 | ARC          | KLF4  | +      | 1375  | 1385 | 1.35E-05 | 0.0308  | ACACACCCAGA      |
|               | 100623615 | LY6D         | KLF4  | +      | 1290  | 1300 | 2.76E-07 | 0.00128 | CCACACCCCTCC     |
|               | 100521889 | ADGRE1       | KLF4  | +      | 2240  | 2250 | 8.89E-07 | 0.00474 | CCACACCCCTCT     |

|           |           |              |      |   |      |      |          |          |             |
|-----------|-----------|--------------|------|---|------|------|----------|----------|-------------|
|           | 106505337 | LOC106505337 | KLF4 | + | 1380 | 1390 | 1.90E-06 | 0.00987  | CCACACCCTTG |
|           | 733625    | SFN          | KLF4 | - | 2046 | 2056 | 2.27E-06 | 0.0114   | CCACACCCTTT |
|           | 100623615 | LY6D         | KLF4 | - | 2193 | 2203 | 8.44E-06 | 0.0195   | CCACGCCCTCC |
|           | 100523389 | SLC37A2      | KLF4 | + | 398  | 408  | 1.38E-07 | 0.00071  | CCACACCCTGC |
|           | 397166    | MS4A2        | KLF4 | + | 2270 | 2280 | 1.38E-07 | 0.000743 | CCACACCCTGC |
|           | 100738360 | PDIA2        | KLF4 | - | 83   | 93   | 2.76E-07 | 0.00124  | CCACACCCTCC |
|           | 100514493 | ATP1B3       | KLF4 | + | 58   | 68   | 4.14E-07 | 0.00213  | CCACACCCTGG |
|           | 396934    | RENBP        | KLF4 | + | 1029 | 1039 | 7.21E-07 | 0.00324  | CCACACCCTCG |
|           | 106509607 | LOC106509607 | KLF4 | + | 2348 | 2358 | 7.21E-07 | 0.00361  | CCACACCCTCG |
|           | 100516578 | CCDC80       | KLF4 | - | 892  | 902  | 8.89E-07 | 0.00478  | CCACACCCTCT |
|           | 100513308 | TM4SF5       | KLF4 | - | 1005 | 1015 | 8.89E-07 | 0.00466  | CCACACCCTCT |
|           | 100738360 | PDIA2        | KLF4 | + | 798  | 808  | 2.07E-06 | 0.00464  | ACACACCCTCC |
|           | 100294675 | DGAT2        | KLF4 | + | 414  | 424  | 2.41E-06 | 0.0115   | CCACACCCAGC |
|           | 100155159 | PYROXD2      | KLF4 | + | 717  | 727  | 2.55E-06 | 0.0121   | CCACACCCACC |
|           | 102159476 | LOC102159476 | KLF4 | + | 2686 | 2696 | 2.55E-06 | 0.0131   | CCACACCCACC |
|           | 110257275 | LOC110257275 | KLF4 | + | 2053 | 2063 | 3.13E-06 | 0.0167   | CCACACCCTAT |
|           | 100737517 | SLC40A1      | KLF4 | - | 1055 | 1065 | 3.33E-06 | 0.0168   | CCACACCCTAA |
|           | 100514218 | GJC2         | KLF4 | - | 569  | 579  | 3.50E-06 | 0.0146   | ACACACCCTGG |
| Cluster 4 | 100738133 | LOC100738133 | KLF4 | + | 1576 | 1586 | 3.87E-06 | 0.0205   | ACACACCCTCG |
|           | 100154506 | ENTPD5       | KLF4 | - | 562  | 572  | 4.21E-06 | 0.0212   | CCACACCCAGG |
|           | 397687    | CYP2D25      | KLF4 | - | 1604 | 1614 | 4.21E-06 | 0.0206   | ACACACCCTCT |
|           | 100158243 | SLC16A3      | KLF4 | + | 423  | 433  | 4.21E-06 | 0.0194   | CCACACCCAGG |
|           | 397013    | PPARGC1A     | KLF4 | - | 10   | 20   | 4.52E-06 | 0.0238   | CCACACCCAGT |
|           | 397018    | SCARB1       | KLF4 | - | 512  | 522  | 4.52E-06 | 0.0221   | CCACACCCACG |
|           | 100627632 | ZKSCAN7      | KLF4 | - | 840  | 850  | 4.52E-06 | 0.0238   | CCACACCCACG |
|           | 102161066 | LOC102161066 | KLF4 | + | 894  | 904  | 4.52E-06 | 0.0217   | CCACACCCACG |
|           | 448846    | EHHADH       | KLF4 | - | 1127 | 1137 | 5.64E-06 | 0.03     | CCACACCCAGA |
|           | 100515955 | PTPRU        | KLF4 | - | 1533 | 1543 | 5.81E-06 | 0.03     | CCACACCCACA |
|           | 100233171 | AGPAT3       | KLF4 | + | 327  | 337  | 5.81E-06 | 0.027    | CCACACCCACA |
|           | 100151843 | SNTA1        | KLF4 | + | 2169 | 2179 | 5.81E-06 | 0.0288   | CCACACCCACA |
|           | 100514218 | GJC2         | KLF4 | - | 1122 | 1132 | 5.95E-06 | 0.0146   | GCACACCCTGC |
|           | 100516578 | CCDC80       | KLF4 | + | 2356 | 2366 | 6.08E-06 | 0.0164   | GCACACCCTCC |
|           | 100626343 | ABCD3        | KLF4 | + | 983  | 993  | 6.29E-06 | 0.0326   | ACACACCCTAC |
|           | 110262031 | LOC110262031 | KLF4 | + | 1548 | 1558 | 6.46E-06 | 0.0301   | CCACACCCAAC |



|           |              |        |      |      |      |          |          |             |             |
|-----------|--------------|--------|------|------|------|----------|----------|-------------|-------------|
| 100153250 | GPD1         | KLF4   | -    | 513  | 523  | 7.25E-06 | 0.0358   | CCACACCCATG |             |
| 100521912 | WNT11        | KLF4   | -    | 943  | 953  | 7.25E-06 | 0.0343   | CCACACCCATG |             |
| 100623809 | TMC5         | KLF4   | -    | 1366 | 1376 | 7.25E-06 | 0.0379   | CCACACCCATG |             |
| 100156914 | SLC24A4      | KLF4   | -    | 1336 | 1346 | 7.42E-06 | 0.0371   | ACACACCCACC |             |
| 100512737 | SLC13A2      | KLF4   | +    | 723  | 733  | 7.42E-06 | 0.036    | ACACACCCACC |             |
| 396934    | RENBP        | KLF4   | +    | 1316 | 1326 | 8.44E-06 | 0.0176   | CCACGCCCTCC |             |
| 100519179 | USP51        | KLF4   | -    | 1692 | 1702 | 8.91E-06 | 0.0479   | GCACACCCTCT |             |
| 100144591 | CYBRD1       | KLF4   | +    | 575  | 585  | 9.08E-06 | 0.0347   | TCACACCCTGC |             |
| 102161066 | LOC102161066 | KLF4   | +    | 828  | 838  | 1.13E-05 | 0.0217   | CAACACCCTGC |             |
| 396934    | RENBP        | KLF4   | -    | 2283 | 2293 | 1.18E-05 | 0.0176   | CAACACCCTCC |             |
| 100141405 | CTSZ         | KLF4   | +    | 578  | 588  | 1.22E-05 | 0.0432   | ACACACCCAGG |             |
| 100144591 | CYBRD1       | KLF4   | -    | 487  | 497  | 1.35E-05 | 0.0347   | ACACACCCAGA |             |
| 397687    | CYP2D25      | KLF4   | -    | 1653 | 1663 | 1.41E-05 | 0.0345   | ACACACCCACA |             |
| 100738360 | PDIA2        | KLF4   | +    | 2020 | 2030 | 1.42E-05 | 0.0213   | CCACGCCCTCT |             |
| 100737517 | SLC40A1      | KLF4   | -    | 2068 | 2078 | 1.46E-05 | 0.0366   | CCACGCCCTTC |             |
| 397013    | PPARGC1A     | KLF4   | +    | 2496 | 2506 | 1.59E-05 | 0.0418   | GCACACCCAGC |             |
| 100141405 | CTSZ         | KLF4   | -    | 512  | 522  | 1.93E-05 | 0.0432   | CCACACCCCGT |             |
| 100512737 | SLC13A2      | KLF4   | +    | 1194 | 1204 | 2.10E-05 | 0.036    | CCACACCCCA  |             |
| 100512737 | SLC13A2      | KLF4   | +    | 1547 | 1557 | 2.19E-05 | 0.036    | ACACACCCATG |             |
| 100515339 | KRT19        | KLF4   | +    | 183  | 193  | 1.38E-07 | 0.00068  | CCACACCCTGC |             |
| 100625050 | EPSTI1       | KLF4   | +    | 138  | 148  | 4.14E-07 | 0.0021   | CCACACCCTGG |             |
| 100511161 | PLA2G3       | KLF4   | +    | 2260 | 2270 | 8.89E-07 | 0.00445  | CCACACCCTCT |             |
| 100515339 | KRT19        | KLF4   | -    | 2138 | 2148 | 1.73E-06 | 0.00426  | ACACACCCTGC |             |
| 100126286 | KRT18        | KLF4   | -    | 1484 | 1494 | 1.90E-06 | 0.00953  | CCACACCCTTG |             |
| 733608    | S100A6       | KLF4   | -    | 2439 | 2449 | 2.07E-06 | 0.005577 | ACACACCCTCC |             |
| 494561    | HK2          | KLF4   | +    | 1672 | 1682 | 2.07E-06 | 0.0104   | ACACACCCTCC |             |
| Cluster 5 | 733608       | S100A6 | KLF4 | -    | 438  | 448      | 2.41E-06 | 0.00577     | CCACACCCAGC |
| 100156455 | TC2N         | KLF4   | -    | 2501 | 2511 | 2.41E-06 | 0.0125   | CCACACCCAGC |             |
| 100622336 | CSF3R        | KLF4   | -    | 2142 | 2152 | 3.50E-06 | 0.0178   | ACACACCCTGG |             |
| 100158162 | ATP10A       | KLF4   | +    | 223  | 233  | 4.21E-06 | 0.0222   | CCACACCCAGG |             |
| 733608    | S100A6       | KLF4   | +    | 734  | 744  | 4.73E-06 | 0.00754  | ACACACCCTTC |             |
| 100512686 | IRS1         | KLF4   | -    | 233  | 243  | 5.10E-06 | 0.0235   | CCACACCCACT |             |
| 100623590 | PKP1         | KLF4   | -    | 1005 | 1015 | 5.95E-06 | 0.0238   | GCACACCCTGC |             |
| 396764    | SLC11A1      | KLF4   | +    | 975  | 985  | 7.25E-06 | 0.0306   | CCACACCCATG |             |

|           |           |              |      |   |      |      |          |         |             |
|-----------|-----------|--------------|------|---|------|------|----------|---------|-------------|
|           | 494561    | HK2          | KLF4 | + | 1213 | 1223 | 7.62E-06 | 0.0192  | CCACACCCATT |
|           | 100153504 | F13A1        | KLF4 | - | 1931 | 1941 | 7.98E-06 | 0.0391  | CCACGCCCTGC |
|           | 100515902 | LOC100515902 | KLF4 | - | 1941 | 1951 | 7.98E-06 | 0.0419  | CCACGCCCTGC |
|           | 100511161 | PLA2G3       | KLF4 | - | 967  | 977  | 9.25E-06 | 0.0231  | GCACACCCTTC |
|           | 100623590 | PKP1         | KLF4 | - | 820  | 830  | 9.59E-06 | 0.0238  | TCACACCCTCC |
|           | 110260216 | LOC110260216 | KLF4 | - | 193  | 203  | 1.01E-05 | 0.0419  | CGACACCCTGC |
|           | 396764    | SLC11A1      | KLF4 | - | 809  | 819  | 1.19E-05 | 0.0306  | CCACACCCCCC |
|           | 110259210 | MUC5AC       | KLF4 | + | 2039 | 2049 | 1.32E-05 | 0.0423  | ACACACCCATC |
|           | 110260216 | LOC110260216 | KLF4 | + | 52   | 62   | 1.59E-05 | 0.0419  | TCACACCCTCT |
|           | 100625050 | EPSTI1       | KLF4 | + | 2087 | 2097 | 1.89E-05 | 0.047   | CCACACCCCGG |
|           | 110259210 | MUC5AC       | KLF4 | - | 1643 | 1653 | 1.89E-05 | 0.0423  | CCACACCCCGG |
|           | 406187    | APOC3        | KLF4 | + | 1318 | 1328 | 1.23E-06 | 0.00619 | CCACACCCTGA |
|           | 100192320 | BCO1         | KLF4 | + | 1542 | 1552 | 1.23E-06 | 0.00643 | CCACACCCTGA |
|           | 403104    | CYP2B22      | KLF4 | - | 2417 | 2427 | 2.07E-06 | 0.0108  | ACACACCCTCC |
| Cluster 6 | 100171400 | TRPV6        | KLF4 | + | 456  | 466  | 5.10E-06 | 0.0255  | CCACACCCACT |
|           | 403104    | CYP2B22      | KLF4 | - | 1640 | 1650 | 7.08E-06 | 0.0185  | ACACACCCAGC |
|           | 100519006 | DUSP9        | KLF4 | + | 2568 | 2578 | 8.91E-06 | 0.0396  | GCACACCCTCT |
|           | 110259705 | TH           | KLF4 | + | 357  | 367  | 1.09E-05 | 0.0486  | CCACACCCAAT |

---

**Table S9.** List of gene associated with H3K4me3 enrichment.

| Chromosome  | Peak Start | Peak End  | Strand | Log 2 fold enrichment of H3K4me3 | Distance | Closest TSS ID | Symbol  | Gene Start | Gene End  |
|-------------|------------|-----------|--------|----------------------------------|----------|----------------|---------|------------|-----------|
| NC_010456.5 | 98908619   | 98908850  | +      | -1.44                            | 149      | 100155074      | AICF    | 98908585   | 98990362  |
| NC_010456.5 | 98909294   | 98909665  | +      | 2.05                             | 894      | 100155074      | AICF    | 98908585   | 98990362  |
| NC_010456.5 | 98908272   | 98908561  | +      | -0.76                            | -168     | 100155074      | AICF    | 98908585   | 98990362  |
| NC_010451.4 | 12278683   | 12278971  | +      | 0.40                             | 300      | 100737883      | AAMDC   | 12278527   | 12305217  |
| NC_010450.4 | 55644792   | 55645073  | -      | 0.05                             | 588      | 100627475      | AASDH   | 55604394   | 55645521  |
| NC_010444.4 | 77373995   | 77374283  | -      | 1.46                             | 932      | 100623892      | ABCA7   | 77357161   | 77375071  |
| NC_010456.5 | 60305062   | 60305350  | +      | 0.78                             | -4687    | 100153026      | ABCB10  | 60309893   | 60346283  |
| NC_010448.4 | 36464866   | 36465097  | +      | -0.95                            | 815      | 110260969      | ABCC11  | 36464166   | 36546989  |
| NC_010445.4 | 112000220  | 112000526 | -      | 0.78                             | 1742     | 100525041      | ABHD1   | 111996138  | 112002115 |
| NC_010455.5 | 147775286  | 147775599 | -      | -0.05                            | 2628     | 100623142      | ABHD10  | 147760742  | 147778071 |
| NC_010445.4 | 11004009   | 11004297  | -      | 2.46                             | -364     | 100525863      | ABHD11  | 11000993   | 11003789  |
| NC_010443.5 | 225191222  | 225191453 | -      | 0.46                             | 1991     | 100155547      | ABHD17B | 225149922  | 225193329 |
| NC_010449.5 | 49541720   | 49542008  | +      | 1.78                             | 1166     | 100522555      | ABHD17C | 49540698   | 49599323  |
| NC_010455.5 | 27006966   | 27007306  | +      | -1.27                            | 805      | 497624         | ABHD5   | 27006331   | 27053760  |
| NC_010443.5 | 270762880  | 270763111 | +      | 0.20                             | 1166     | 100524544      | ABL1    | 270761829  | 270906708 |
| NC_010455.5 | 23019953   | 23020312  | -      | 2.73                             | 5        | 100515577      | ACAA1   | 22964844   | 23020138  |
| NC_010451.4 | 60807769   | 60808057  | +      | 0.95                             | 452      | 100627341      | ACAD8   | 60807461   | 60828379  |
| NC_010452.4 | 48921782   | 48922212  | -      | 0.73                             | -667     | 100514676      | ACBD5   | 48883116   | 48921330  |
| NC_010451.4 | 11004967   | 11005255  | +      | 1.78                             | 407      | 100524160      | ACER3   | 11004704   | 11167386  |
| NC_010455.5 | 73774435   | 73774671  | +      | 0.37                             | 691      | 100037292      | ACKR4   | 73773862   | 73777770  |
| NC_010448.4 | 55539630   | 55539958  | +      | 1.68                             | 4388     | 100620403      | ACPT    | 55535406   | 55541929  |
| NC_010447.5 | 64038419   | 64038707  | +      | 0.61                             | 1753     | 397317         | ACRBP   | 64036810   | 64047846  |
| NC_010454.4 | 26714801   | 26715089  | +      | 3.78                             | 1155     | 100512859      | ACSF2   | 26713790   | 26752352  |
| NC_010457.5 | 124742941  | 124743331 | +      | -1.29                            | 1147     | 100233169      | ACSL3   | 124741989  | 124816955 |
| NC_010456.5 | 122776624  | 122776912 | +      | 1.73                             | -376     | 100157521      | ACSL5   | 122777144  | 122828054 |
| NC_010445.4 | 4088277    | 4088593   | -      | 2.46                             | 1948     | 414396         | ACTB    | 4084275    | 4090383   |
| NC_010458.4 | 36471929   | 36472217  | -      | 3.20                             | -297     | 100522578      | ACTBL2  | 36469062   | 36471776  |
| NC_010443.5 | 136279644  | 136279875 | +      | -0.71                            | -1359    | 100152267      | ACTC1   | 136281119  | 136286551 |
| NC_010455.5 | 117597564  | 117597852 | +      | 2.95                             | -707     | 100523570      | ACTL6A  | 117598415  | 117627311 |
| NC_010456.5 | 113498694  | 113499145 | -      | 1.27                             | -126     | 100156619      | ACTR1A  | 113480196  | 113498793 |
| NC_010443.5 | 113288749  | 113289037 | +      | 4.05                             | -587     | 397345         | ADAM10  | 113289480  | 113407940 |

|             |           |           |   |       |       |           |         |           |           |
|-------------|-----------|-----------|---|-------|-------|-----------|---------|-----------|-----------|
| NC_010454.4 | 18597789  | 18598077  | - | 1.46  | -519  | 100525073 | ADAM11  | 18575727  | 18597414  |
| NC_010457.5 | 47210199  | 47210492  | + | -0.71 | 2618  | 397006    | ADAM2   | 47207727  | 47278315  |
| NC_010456.5 | 8485417   | 8485648   | + | -1.35 | 1141  | 100157954 | ADAM7   | 8484391   | 8554879   |
| NC_010450.4 | 1628259   | 1628490   | + | -2.71 | 1228  | 100517353 | ADD1    | 1627146   | 1710653   |
| NC_010450.4 | 121267435 | 121267723 | + | 1.14  | 785   | 100513555 | ADH5    | 121266794 | 121282313 |
| NC_010456.5 | 10734110  | 10734645  | - | 2.46  | -999  | 100144471 | ADRA1A  | 10623391  | 10733378  |
| NC_010447.5 | 53688227  | 53688510  | - | -0.22 | 3118  | 100522805 | AEBP2   | 53617362  | 53691487  |
| NC_010443.5 | 1696237   | 1696539   | - | 3.05  | 2086  | 100514741 | AFDN    | 1569652   | 1698474   |
| NC_010450.4 | 69709853  | 69710226  | + | 1.88  | 3216  | 100628071 | AFM     | 69706823  | 69728268  |
| NC_010457.5 | 39713502  | 39713877  | - | 2.24  | 876   | 100152203 | AGA     | 39702900  | 39714566  |
| NC_010444.4 | 14935372  | 14935603  | + | -1.44 | 2299  | 100514151 | AGBL2   | 14933188  | 14971416  |
| NC_010457.5 | 128898557 | 128898986 | + | 1.10  | -34   | 100514990 | AGFG1   | 128898806 | 128980782 |
| NC_010444.4 | 85891238  | 85891469  | + | -0.12 | 930   | 100520064 | AGGF1   | 85890423  | 85941314  |
| NC_010448.4 | 92082836  | 92083175  | + | -1.12 | 1241  | 100499509 | AGO3    | 92081764  | 92225811  |
| NC_010448.4 | 91975811  | 91976099  | + | 1.46  | 4632  | 100499507 | AGO4    | 91971323  | 92013030  |
| NC_010457.5 | 37801239  | 37801642  | + | 2.68  | 319   | 100233172 | AGPAT5  | 37801121  | 37853472  |
| NC_010446.5 | 110131636 | 110131924 | - | 2.20  | 1046  | 100512899 | AHCYL1  | 110092983 | 110132826 |
| NC_010449.5 | 100513583 | 100513992 | + | 1.31  | 3191  | 100626607 | AHSA1   | 100510596 | 100520353 |
| NC_010449.5 | 100511256 | 100511487 | + | -1.12 | 775   | 100626607 | AHSA1   | 100510596 | 100520353 |
| NC_010452.4 | 11468003  | 11468343  | - | 2.78  | -1794 | 100518326 | AIDA    | 11430758  | 11466379  |
| NC_010444.4 | 5049093   | 5049402   | - | 1.61  | -362  | 100511065 | AIP     | 5042883   | 5048885   |
| NC_010448.4 | 89316016  | 89316304  | - | -1.44 | 1880  | 100620859 | AK2     | 89295166  | 89318040  |
| NC_010451.4 | 71895356  | 71895690  | + | 2.05  | -103  | 396908    | AKAP9   | 71895626  | 72054898  |
| NC_010451.4 | 71896205  | 71896581  | + | 0.73  | 767   | 396908    | AKAP9   | 71895626  | 72054898  |
| NC_010443.5 | 56070390  | 56070621  | - | -0.93 | -323  | 100519991 | AKIRIN2 | 56047188  | 56070182  |
| NC_010455.5 | 34334627  | 34335411  | + | 3.20  | 1756  | 100307125 | ALAS1   | 34333263  | 34347435  |
| NC_010461.5 | 47892305  | 47892593  | - | 1.46  | 3592  | 100518817 | ALAS2   | 47871519  | 47896041  |
| NC_010451.4 | 39620051  | 39620295  | - | 0.56  | -274  | 100519965 | ALG9    | 39531280  | 39619899  |
| NC_010450.4 | 110367640 | 110368101 | - | 1.22  | 130   | 100514116 | ALPK1   | 110241220 | 110368001 |
| NC_010443.5 | 76841420  | 76841757  | + | -1.27 | 2140  | 100155925 | AMD1    | 76839448  | 76863745  |
| NC_010448.4 | 29362288  | 29362541  | + | 0.46  | -4397 | 100516197 | AMFR    | 29366812  | 29417800  |
| NC_010461.5 | 92649013  | 92649301  | - | 3.46  | -2761 | 100158213 | AMOT    | 92581995  | 92646396  |
| NC_010454.4 | 11894721  | 11895009  | - | 1.20  | 616   | 100626953 | AMZ2    | 11885682  | 11895481  |
| NC_010456.5 | 75082438  | 75082753  | + | 2.88  | -130  | 100155019 | ANAPC16 | 75082726  | 75093078  |

|                |           |           |   |       |       |           |          |           |           |
|----------------|-----------|-----------|---|-------|-------|-----------|----------|-----------|-----------|
| NC_010456.5    | 31259943  | 31260700  | + | 1.56  | 594   | 100152087 | ANAPC5   | 31259727  | 31301153  |
| NC_010456.5    | 31790304  | 31790590  | - | -1.12 | -697  | 100155743 | ANAPC7   | 31744729  | 31789750  |
| NC_010451.4    | 32622746  | 32622982  | - | -1.12 | 4473  | 100519911 | ANGPTL5  | 32610041  | 32627337  |
| NC_010448.4    | 98813336  | 98813813  | - | 0.00  | 1117  | 100519490 | ANKRD12  | 98697220  | 98814692  |
| NC_010456.5    | 100771466 | 100771754 | - | 1.88  | 802   | 100152630 | ANKRD22  | 100747955 | 100772412 |
| NC_010447.5    | 17249843  | 17250131  | + | 1.46  | 2647  | 100522737 | ANKRD33  | 17247340  | 17251099  |
| NW_018084979.1 | 1265398   | 1265698   | - | 2.20  | -1318 | 100739812 | ANKRD9   | 1257830   | 1264230   |
| NC_010445.4    | 24849244  | 24849547  | - | -1.12 | 3420  | 100525512 | ANKS4B   | 24836446  | 24852816  |
| NC_010456.5    | 21315891  | 21316181  | - | 2.20  | -776  | 100627945 | ANXA10   | 21249020  | 21315260  |
| NC_010450.4    | 102389396 | 102389684 | + | 1.88  | 1707  | 100521982 | ANXA5    | 102387833 | 102420868 |
| NC_010448.4    | 14807290  | 14807748  | - | 2.20  | 2302  | 100514713 | AP1G1    | 14719949  | 14809821  |
| NC_010444.4    | 87141087  | 87141418  | - | 0.07  | 1469  | 100049670 | AP3B1    | 86875922  | 87142722  |
| NC_010450.4    | 32303886  | 32304174  | - | 1.78  | -1793 | 100514856 | APBB2    | 31921587  | 32302237  |
| NC_010444.4    | 18993773  | 18994128  | - | 3.05  | 284   | 100522006 | API5     | 18962262  | 18994235  |
| NC_010447.5    | 62816032  | 62816320  | - | 0.46  | 4353  | 100512412 | APOBEC1  | 62811819  | 62820529  |
| NC_010454.4    | 37614402  | 37614690  | + | 2.05  | 776   | 100525889 | APPBP2   | 37613770  | 37678710  |
| NC_010452.4    | 33470310  | 33470598  | + | 0.88  | 365   | 387596    | APTX     | 33470089  | 33495584  |
| NC_010451.4    | 12067697  | 12067928  | + | -0.71 | 2262  | 100127151 | AQP11    | 12065550  | 12076339  |
| NC_010455.5    | 39428443  | 39428731  | - | 3.31  | 1590  | 595108    | ARF4     | 39410094  | 39430177  |
| NC_010460.4    | 20697445  | 20697747  | - | 1.20  | 1039  | 100270722 | ARF5     | 20695706  | 20698635  |
| NC_010456.5    | 89326590  | 89326821  | - | -0.44 | 4923  | 102159729 | ARHGAP22 | 89243015  | 89331629  |
| NC_010451.4    | 31721863  | 31722152  | + | 0.73  | 1421  | 100519555 | ARHGAP42 | 31720586  | 31999730  |
| NC_010449.5    | 67592850  | 67593296  | - | -0.86 | 1170  | 100520849 | ARHGAP5  | 67494237  | 67594243  |
| NC_010447.5    | 22761035  | 22761598  | - | 2.61  | -901  | 100518732 | ARHGAP9  | 22747346  | 22760415  |
| NC_010446.5    | 94054420  | 94054781  | + | 2.05  | -1843 | 100145887 | ARHGEF2  | 94056444  | 94082206  |
| NC_010446.5    | 94053878  | 94054186  | + | 3.05  | -2412 | 100145887 | ARHGEF2  | 94056444  | 94082206  |
| NC_010450.4    | 116200031 | 116200319 | - | 2.20  | -901  | 100738766 | ARHGEF38 | 116063725 | 116199274 |
| NC_010453.5    | 77428936  | 77429210  | + | -0.12 | 1721  | 100516509 | ARHGEF7  | 77427352  | 77522698  |
| NC_010447.5    | 76635054  | 76635632  | + | 1.46  | -2042 | 100625757 | ARID2    | 76637385  | 76800155  |
| NC_010447.5    | 82796898  | 82797280  | + | 2.05  | 1348  | 595113    | ARL1     | 82795741  | 82812153  |
| NC_010451.4    | 82226247  | 82226632  | + | -0.76 | 440   | 595121    | ARL4A    | 82225999  | 82228951  |
| NC_010452.4    | 55700979  | 55701279  | - | -1.12 | -740  | 100627052 | ARL5B    | 55675129  | 55700389  |
| NC_010452.4    | 55698655  | 55698943  | - | 1.78  | 1590  | 100627052 | ARL5B    | 55675129  | 55700389  |
| NC_010445.4    | 17109349  | 17109637  | - | 2.20  | -970  | 110255213 | ARMC5    | 17100612  | 17108523  |

|             |           |           |   |       |       |           |          |           |           |
|-------------|-----------|-----------|---|-------|-------|-----------|----------|-----------|-----------|
| NC_010457.5 | 120299095 | 120299569 | + | 2.20  | 2210  | 100153175 | ARPC2    | 120297122 | 120328795 |
| NC_010457.5 | 120298285 | 120298573 | + | 0.14  | 1307  | 100153175 | ARPC2    | 120297122 | 120328795 |
| NC_010444.4 | 98441802  | 98442469  | - | 1.63  | 2544  | 100520233 | ARRDC3   | 98430451  | 98444680  |
| NC_010443.5 | 67656038  | 67656326  | - | 2.20  | 898   | 100625273 | ASCC3    | 67331939  | 67657080  |
| NC_010443.5 | 67656581  | 67656920  | - | 2.29  | 329   | 100625273 | ASCC3    | 67331939  | 67657080  |
| NC_010444.4 | 66260982  | 66261270  | - | 3.46  | 9     | 100520362 | ASNA1    | 66251381  | 66261135  |
| NC_010445.4 | 42192020  | 42192251  | - | -0.12 | 766   | 100511749 | ASPN     | 42165553  | 42192902  |
| NC_010456.5 | 131580110 | 131580763 | - | 1.34  | -674  | 100512816 | ATE1     | 131412628 | 131579762 |
| NC_010447.5 | 16618038  | 16618326  | + | 0.46  | -948  | 102158891 | ATF1     | 16619130  | 16681391  |
| NC_010457.5 | 81075953  | 81076261  | - | 1.05  | 441   | 100513441 | ATF2     | 80984969  | 81076548  |
| NC_010448.4 | 54942973  | 54943218  | + | -2.12 | -2285 | 100523675 | ATF5     | 54945381  | 54950142  |
| NC_010447.5 | 18837411  | 18837645  | - | -1.71 | 891   | 100518609 | ATF7     | 18726329  | 18838419  |
| NC_010444.4 | 119964955 | 119965186 | - | -1.71 | 631   | 100462745 | ATG12    | 119948443 | 119965702 |
| NC_010443.5 | 184747993 | 184748496 | - | 1.73  | -4492 | 100155666 | ATG14    | 184701020 | 184743752 |
| NC_010444.4 | 8361216   | 8361456   | + | -1.93 | -556  | 100512265 | ATL3     | 8361892   | 8408919   |
| NC_010456.5 | 71401595  | 71401883  | - | 1.88  | 740   | 100624800 | ATOH7    | 71398939  | 71402479  |
| NC_010450.4 | 37412322  | 37412669  | + | 1.56  | 4818  | 100520087 | ATP10D   | 37407677  | 37531707  |
| NC_010455.5 | 120728906 | 120729194 | + | 1.20  | 1388  | 100624673 | ATP11B   | 120727662 | 120873907 |
| NC_010461.5 | 114570900 | 114571131 | - | -1.35 | 4642  | 100523658 | ATP11C   | 114394436 | 114575658 |
| NC_010455.5 | 82681509  | 82681758  | + | -0.44 | 1191  | 100514493 | ATP1B3   | 82680442  | 82727052  |
| NC_010451.4 | 64335858  | 64336158  | + | 2.46  | -460  | 100623420 | ATP2B4   | 64336468  | 64445669  |
| NC_010448.4 | 45057578  | 45058009  | - | 1.10  | 2     | 397552    | ATP4A    | 44984015  | 45057796  |
| NC_010445.4 | 6395938   | 6396351   | - | 2.63  | 706   | 100037979 | ATP5J2   | 6389338   | 6396851   |
| NC_010443.5 | 180068746 | 180069034 | + | 2.46  | -267  | 100157404 | ATP5S    | 180069157 | 180081322 |
| NC_010443.5 | 180069744 | 180070110 | + | 3.22  | 770   | 100157404 | ATP5S    | 180069157 | 180081322 |
| NC_010443.5 | 255151933 | 255152245 | + | 3.78  | 180   | 100154379 | ATP6V1G1 | 255151909 | 255159299 |
| NC_010443.5 | 121700274 | 121700562 | + | 1.46  | 2656  | 100154720 | ATP8B4   | 121697762 | 121914633 |
| NC_010455.5 | 31163896  | 31164184  | + | 1.78  | 4191  | 100523399 | ATRIP    | 31159849  | 31178716  |
| NC_010447.5 | 37978106  | 37978562  | + | -2.58 | -378  | 100524374 | ATXN7L3B | 37978712  | 37982432  |
| NC_010456.5 | 2542969   | 2543200   | - | -0.86 | 3244  | 100155020 | AUH      | 2398456   | 2546329   |
| NC_010456.5 | 2545300   | 2545568   | - | -1.35 | 895   | 100155020 | AUH      | 2398456   | 2546329   |
| NC_010448.4 | 63657156  | 63657470  | - | 3.78  | 216   | 110261341 | AURKAIP1 | 63656120  | 63657529  |
| NC_010445.4 | 13561533  | 13561846  | + | -0.12 | -3749 | 100515476 | AUTS2    | 13565439  | 14794365  |
| NC_010461.5 | 56263503  | 56264038  | + | 2.73  | 688   | 100517507 | AWAT1    | 56263082  | 56273169  |

|             |           |           |   |       |       |           |          |           |           |
|-------------|-----------|-----------|---|-------|-------|-----------|----------|-----------|-----------|
| NC_010454.4 | 12342780  | 12343068  | - | 2.20  | -44   | 100739604 | AXIN2    | 12311293  | 12342880  |
| NC_010455.5 | 100815827 | 100816115 | - | 1.20  | -4622 | 397634    | B3GALNT1 | 100772892 | 100811349 |
| NC_010452.4 | 609474    | 609705    | + | -1.44 | -3874 | 100525885 | B3GALT2  | 613464    | 623587    |
| NC_010445.4 | 79687948  | 79688236  | - | 0.88  | 1586  | 100524195 | B3GNT2   | 79671393  | 79689678  |
| NC_010449.5 | 28683002  | 28683233  | - | -0.35 | -2620 | 100522554 | BAG2     | 28668587  | 28680497  |
| NC_010445.4 | 5566250   | 5566481   | - | -0.54 | 1560  | 100521439 | BAIAP2L1 | 5472305   | 5567926   |
| NC_010455.5 | 34552638  | 34552926  | - | 0.88  | 727   | 100154798 | BAP1     | 34544570  | 34553509  |
| NC_010448.4 | 54221706  | 54221994  | + | 3.20  | -491  | 396633    | BAX      | 54222341  | 54228150  |
| NC_010446.5 | 105992837 | 105993136 | + | 0.33  | 428   | 100154006 | BCAS2    | 105992558 | 106003160 |
| NC_010446.5 | 106676394 | 106676770 | + | -1.00 | 3027  | 100517031 | BCL2L15  | 106673555 | 106683103 |
| NC_010451.4 | 39872065  | 39872559  | + | 1.56  | 281   | 100517547 | BCO2     | 39872031  | 39916491  |
| NC_010458.4 | 47801847  | 47802213  | + | -1.41 | 757   | 100517687 | BDP1     | 47801273  | 47909513  |
| NC_010454.4 | 20042039  | 20042327  | + | 2.46  | 269   | 733576    | BECN1    | 20041914  | 20054249  |
| NC_010447.5 | 42142380  | 42142700  | - | 3.68  | 1127  | 100511132 | BICD1    | 41897611  | 42143667  |
| NC_010456.5 | 6923283   | 6923635   | - | 0.14  | 3491  | 100153227 | BIN3     | 6874281   | 6926950   |
| NC_010446.5 | 81639425  | 81639713  | - | 1.46  | 219   | 100622972 | BLZF1    | 81597312  | 81639788  |
| NC_010443.5 | 183418994 | 183419742 | - | 2.18  | 3520  | 100113425 | BMP4     | 183415989 | 183422888 |
| NC_010457.5 | 105972786 | 105973420 | + | -0.05 | 1526  | 100127483 | BMPR2    | 105971577 | 106132496 |
| NC_010444.4 | 58684479  | 58684802  | + | 1.88  | 132   | 100620218 | BORCS8   | 58684508  | 58696586  |
| NC_010445.4 | 1908723   | 1908954   | + | -1.12 | 3190  | 100623177 | BRAT1    | 1905648   | 1918229   |
| NC_010449.5 | 25149363  | 25149668  | + | -1.12 | -2791 | 100141307 | BRD2     | 25152307  | 25162576  |
| NC_010444.4 | 140202092 | 140202380 | - | 1.88  | 11    | 100518182 | BRD8     | 140182195 | 140202247 |
| NC_010454.4 | 36498103  | 36498518  | + | 1.88  | 172   | 100525359 | BRIP1    | 36498138  | 36639847  |
| NC_010455.5 | 66018501  | 66018789  | + | 1.20  | -2403 | 100155061 | BRPF1    | 66021048  | 66037446  |
| NC_010455.5 | 202896279 | 202896652 | - | 2.46  | 79    | 100738890 | BRWD1    | 202776040 | 202896545 |
| NC_010444.4 | 9052787   | 9053086   | + | 1.46  | 205   | 100144883 | BSCL2    | 9052731   | 9064890   |
| NC_010456.5 | 103531115 | 103531422 | + | 2.05  | 521   | 100156116 | BTAF1    | 103530747 | 103641082 |
| NC_010456.5 | 103530581 | 103531045 | + | 1.46  | 66    | 100156116 | BTAF1    | 103530747 | 103641082 |
| NC_010449.5 | 51878015  | 51878605  | + | -0.54 | 864   | 100154013 | BTBD1    | 51877446  | 51925886  |
| NC_010459.5 | 20846741  | 20847053  | + | -0.61 | 2114  | 100156598 | BTBD3    | 20844783  | 20878217  |
| NC_010448.4 | 160135299 | 160135587 | - | 2.85  | 763   | 100736651 | BTF3L4   | 160109492 | 160136206 |
| NC_010451.4 | 64035039  | 64035327  | + | 1.46  | 1330  | 100048932 | BTG2     | 64033853  | 64037795  |
| NC_010451.4 | 64036938  | 64037226  | + | 1.88  | 3229  | 100048932 | BTG2     | 64033853  | 64037795  |
| NC_010451.4 | 39284195  | 39284483  | - | 1.05  | -3012 | 100514308 | BTG4     | 39253116  | 39281327  |

|             |           |           |   |       |       |           |              |           |           |
|-------------|-----------|-----------|---|-------|-------|-----------|--------------|-----------|-----------|
| NC_010451.4 | 85888300  | 85888598  | + | 0.88  | 616   | 100514864 | BZW2         | 85887833  | 85947410  |
| NC_010452.4 | 32429779  | 32430067  | + | 0.61  | -1819 | 100522632 | C10H9orf24   | 32431742  | 32435622  |
| NC_010454.4 | 50728648  | 50729117  | - | 2.78  | -114  | 100521293 | C12H17orf100 | 50644783  | 50728768  |
| NC_010455.5 | 182409282 | 182409513 | - | 0.65  | -335  | 100736918 | C13H21orf91  | 182374587 | 182409062 |
| NC_010455.5 | 182407706 | 182407938 | - | -0.12 | 1240  | 100736918 | C13H21orf91  | 182374587 | 182409062 |
| NC_010455.5 | 182412017 | 182412362 | - | 3.27  | -3127 | 100736918 | C13H21orf91  | 182374587 | 182409062 |
| NC_010455.5 | 141073247 | 141073535 | - | 2.46  | -4655 | 100511595 | C13H3orf30   | 141064655 | 141068736 |
| NC_010455.5 | 141066139 | 141066458 | - | 2.78  | 2437  | 100511595 | C13H3orf30   | 141064655 | 141068736 |
| NC_010455.5 | 84635653  | 84635941  | + | 3.27  | 1081  | 100517858 | C13H3orf58   | 84634716  | 84656112  |
| NC_010456.5 | 13890552  | 13891089  | + | 2.78  | 474   | 100152195 | C14H8orf74   | 13890346  | 13916783  |
| NC_010458.4 | 17848349  | 17848637  | + | 2.46  | 221   | 100627703 | C16H5orf22   | 17848272  | 17868151  |
| NC_010458.4 | 17849616  | 17849904  | + | 3.46  | 1488  | 100627703 | C16H5orf22   | 17848272  | 17868151  |
| NC_010459.5 | 14610759  | 14611078  | + | 1.88  | -1763 | 100739819 | C17H20orf196 | 14612682  | 14706082  |
| NC_010443.5 | 175147064 | 175147352 | + | 2.05  | 1290  | 100736797 | C1H14orf28   | 175145918 | 175156597 |
| NC_010443.5 | 223157386 | 223157617 | + | 1.46  | 3822  | 100514445 | C1H9orf135   | 223153679 | 223315883 |
| NC_010448.4 | 80584101  | 80584389  | + | 2.46  | -2035 | 445461    | C1QA         | 80586280  | 80589213  |
| NC_010451.4 | 46321741  | 46322029  | + | 1.20  | 124   | 100518141 | C2CD2L       | 46321761  | 46331078  |
| NC_010444.4 | 136299260 | 136299732 | - | 0.05  | -371  | 100511071 | C2H5orf15    | 136286507 | 136299125 |
| NC_010444.4 | 137039172 | 137039403 | + | 2.14  | 1316  | 100627041 | C2H5orf24    | 137037971 | 137049449 |
| NC_010444.4 | 108734381 | 108734848 | + | 0.73  | -4217 | 100625150 | C2H5orf30    | 108738832 | 108753016 |
| NC_010449.5 | 24068237  | 24068599  | + | 2.46  | 399   | 445467    | C4A          | 24068019  | 24083060  |
| NC_010451.4 | 67731133  | 67731364  | + | 0.14  | 140   | 100520761 | C4BPA        | 67731108  | 67774369  |
| NC_010446.5 | 51468437  | 51468750  | + | -0.97 | -560  | 100522371 | C4H8orf59    | 51469154  | 51479506  |
| NC_010447.5 | 18515336  | 18515624  | + | 0.56  | -1467 | 100516439 | C5H12orf10   | 18516947  | 18526069  |
| NC_010447.5 | 79575912  | 79576200  | - | 3.46  | -58   | 100623156 | C5H12orf45   | 79562697  | 79575998  |
| NC_010447.5 | 28820272  | 28820503  | - | -2.71 | -1251 | 100737998 | C5H12orf56   | 28716366  | 28819136  |
| NC_010448.4 | 155569826 | 155570057 | + | -2.44 | 2945  | 100512236 | C6H1orf168   | 155566996 | 155684814 |
| NC_010449.5 | 76033556  | 76034067  | + | -0.60 | 61    | 100626253 | C7H14orf93   | 76033750  | 76061877  |
| NC_010449.5 | 58388375  | 58388682  | - | 4.27  | 1588  | 100154113 | C7H15orf39   | 58380602  | 58390117  |
| NC_010446.5 | 98829952  | 98830247  | - | 1.98  | -1165 | 100153371 | CA14         | 98821577  | 98828934  |
| NC_010448.4 | 1495507   | 1495947   | + | 2.46  | -60   | 110260889 | CA5A         | 1495787   | 1539389   |
| NC_010456.5 | 49787712  | 49788193  | - | 2.05  | -239  | 100157110 | CABIN1       | 49688101  | 49787713  |
| NC_010444.4 | 66103178  | 66103474  | - | 0.29  | -1252 | 100381266 | CALR         | 66098263  | 66102074  |
| NC_010444.4 | 66100862  | 66101150  | - | 2.46  | 1068  | 100381266 | CALR         | 66098263  | 66102074  |



|             |           |           |   |       |       |           |          |           |           |
|-------------|-----------|-----------|---|-------|-------|-----------|----------|-----------|-----------|
| NC_010460.4 | 19874757  | 19875045  | - | 2.78  | 903   | 397301    | CALU     | 19841718  | 19875804  |
| NC_010450.4 | 108916229 | 108916617 | + | 0.61  | 404   | 397674    | CAMK2D   | 108916019 | 109221317 |
| NC_010447.5 | 31656720  | 31657008  | + | 3.78  | -644  | 100514460 | CAND1    | 31657508  | 31700163  |
| NC_010457.5 | 139556153 | 139556441 | + | 2.20  | -1347 | 724069    | CAPN10   | 139557644 | 139568764 |
| NC_010455.5 | 2448362   | 2449120   | + | 3.16  | -3644 | 100037936 | CAPN7    | 2452385   | 2503575   |
| NC_010447.5 | 43041034  | 43041322  | + | 3.46  | -1732 | 100624034 | CAPRIN2  | 43042910  | 43087644  |
| NC_010446.5 | 107819474 | 107819804 | - | 0.24  | 2167  | 100037957 | CAPZA1   | 107769570 | 107821806 |
| NC_010457.5 | 106410263 | 106410551 | + | 1.68  | 162   | 100627358 | CARF     | 106410245 | 106466716 |
| NC_010457.5 | 106409897 | 106410157 | + | -1.00 | -218  | 100627358 | CARF     | 106410245 | 106466716 |
| NC_010444.4 | 2163642   | 2163936   | - | 2.05  | -419  | 100516312 | CARS     | 2119579   | 2163370   |
| NC_010453.5 | 77269614  | 77270089  | - | 3.05  | 84    | 100515851 | CARS2    | 77231866  | 77269936  |
| NC_010451.4 | 74276131  | 74276473  | + | 0.78  | -231  | 100521674 | CASD1    | 74276533  | 74347608  |
| NC_010443.5 | 57833478  | 57833948  | + | 2.14  | -924  | 100523759 | CASP8AP2 | 57834637  | 57864837  |
| NC_010455.5 | 153481200 | 153481488 | + | 1.46  | -398  | 100621690 | CBLB     | 153481742 | 153700089 |
| NC_010451.4 | 107455968 | 107456256 | + | 1.14  | -533  | 100623482 | CBLL1    | 107456645 | 107474615 |
| NC_010459.5 | 56681693  | 56681988  | - | 3.05  | 1420  | 100141408 | CBLN4    | 56674872  | 56683261  |
| NC_010455.5 | 206232104 | 206232392 | - | 2.20  | -1979 | 110256498 | CBS      | 206205942 | 206230269 |
| NC_010447.5 | 19482752  | 19483026  | - | -1.35 | 1626  | 100519426 | CBX5     | 19446083  | 19484515  |
| NC_010444.4 | 65252601  | 65252889  | - | 3.05  | -264  | 100511068 | CC2D1A   | 65235757  | 65252481  |
| NC_010443.5 | 153928947 | 153929255 | - | 0.46  | 3995  | 106506845 | CCDC102B | 153687961 | 153933096 |
| NC_010451.4 | 102919340 | 102919626 | - | -0.35 | 275   | 100737427 | CCDC146  | 102784299 | 102919758 |
| NC_010451.4 | 52146489  | 52146832  | + | 1.14  | 350   | 100525001 | CCDC15   | 52146310  | 52217679  |
| NC_010457.5 | 100538854 | 100539187 | + | 3.27  | -372  | 100154260 | CCDC150  | 100539393 | 100634578 |
| NC_010457.5 | 76005310  | 76005598  | - | 1.05  | 1652  | 100520768 | CCDC173  | 75980102  | 76007106  |
| NC_010446.5 | 124009196 | 124009626 | - | 2.46  | 165   | 100518781 | CCDC18   | 123837581 | 124009576 |
| NC_010450.4 | 102259852 | 102260240 | + | 2.01  | -300  | 100415929 | CCNA2    | 102260346 | 102266274 |
| NC_010443.5 | 66499228  | 66499504  | - | -2.44 | 388   | 100153639 | CCNC     | 66472622  | 66499754  |
| NC_010447.5 | 66116478  | 66116709  | - | -0.76 | -2018 | 397162    | CCND2    | 66092483  | 66114575  |
| NC_010443.5 | 128268484 | 128268892 | - | 1.68  | 846   | 106509015 | CCNDBP1  | 128253111 | 128269534 |
| NC_010450.4 | 72789190  | 72789421  | + | 1.14  | -1088 | 100523979 | CCNG2    | 72790394  | 72800553  |
| NC_010449.5 | 120487835 | 120488066 | + | -1.71 | 810   | 100157799 | CCNK     | 120487140 | 120514223 |
| NC_010455.5 | 97002678  | 97002966  | - | 1.68  | 1579  | 100626293 | CCNL1    | 96986274  | 97004401  |
| NC_010457.5 | 110873208 | 110873744 | + | 3.14  | -467  | 100520645 | CCNYL1   | 110873943 | 110910929 |
| NC_010455.5 | 29399353  | 29399641  | + | 2.78  | -3438 | 414370    | CCRL2    | 29402935  | 29406541  |

|             |           |           |   |       |       |           |          |           |           |
|-------------|-----------|-----------|---|-------|-------|-----------|----------|-----------|-----------|
| NC_010447.5 | 33859256  | 33859694  | + | 1.73  | 961   | 100157776 | CCT2     | 33858514  | 33873596  |
| NC_010446.5 | 93734257  | 93734612  | + | 2.46  | 467   | 100154317 | CCT3     | 93733967  | 93753340  |
| NC_010445.4 | 79924005  | 79924293  | + | 2.78  | -189  | 100521551 | CCT4     | 79924338  | 79941926  |
| NC_010445.4 | 79925009  | 79925536  | + | -0.80 | 934   | 100521551 | CCT4     | 79924338  | 79941926  |
| NC_010447.5 | 63514389  | 63514677  | - | 3.20  | 3     | 100144477 | CD163L1  | 63488678  | 63514536  |
| NC_010446.5 | 103977039 | 103977327 | - | 0.78  | -212  | 396662    | CD2      | 103963802 | 103976971 |
| NC_010445.4 | 17957399  | 17957806  | + | 1.20  | -104  | 100621208 | CD2BP2   | 17957707  | 17961804  |
| NC_010448.4 | 54444184  | 54444472  | + | 2.92  | 3589  | 100624694 | CD37     | 54440739  | 54448193  |
| NC_010451.4 | 135077713 | 135077989 | - | -0.76 | 1059  | 396922    | CD46     | 135025439 | 135078910 |
| NC_010455.5 | 151430473 | 151430857 | + | 1.92  | 1490  | 397042    | CD47     | 151429175 | 151484867 |
| NC_010443.5 | 76180489  | 76180822  | + | -0.93 | 1486  | 100511111 | CDC40    | 76179169  | 76234690  |
| NC_010448.4 | 80036011  | 80036348  | + | 1.14  | 1144  | 780428    | CDC42    | 80035035  | 80089243  |
| NC_010452.4 | 14939922  | 14940153  | - | 0.46  | 950   | 100511216 | CDC42BPA | 14649278  | 14940988  |
| NC_010446.5 | 98175566  | 98175854  | + | 1.29  | 3773  | 100156313 | CDC42SE1 | 98171937  | 98180577  |
| NC_010449.5 | 39385391  | 39385622  | + | -1.76 | 1109  | 100153900 | CDC5L    | 39384397  | 39427729  |
| NC_010449.5 | 39384266  | 39384556  | + | 0.73  | 14    | 100153900 | CDC5L    | 39384397  | 39427729  |
| NC_010443.5 | 159923171 | 159923402 | - | -1.12 | -360  | 100522414 | CDH20    | 159818160 | 159922926 |
| NC_010453.5 | 4055326   | 4055637   | + | -0.71 | 1039  | 100739805 | CDK8     | 4054442   | 4161501   |
| NC_010443.5 | 268276675 | 268277076 | + | 4.27  | -207  | 100307051 | CDK9     | 268277083 | 268280493 |
| NC_010445.4 | 101086131 | 101086419 | + | 2.78  | -881  | 100738632 | CDKL4    | 101087156 | 101138839 |
| NC_010449.5 | 32352759  | 32352990  | + | -1.12 | -1901 | 100152215 | CDKN1A   | 32354776  | 32363771  |
| NC_010457.5 | 44885916  | 44886213  | + | 2.68  | 442   | 100513762 | CDKN2AIP | 44885622  | 44890504  |
| NC_010450.4 | 134039600 | 134039888 | - | 0.46  | 1031  | 733582    | CDS1     | 133959250 | 134040775 |
| NC_010449.5 | 75924239  | 75924527  | + | 1.88  | -2269 | 100157564 | CEBPE    | 75926652  | 75929949  |
| NC_010446.5 | 110844777 | 110845065 | - | 1.78  | 433   | 106510206 | CELSR2   | 110819422 | 110845354 |
| NC_010450.4 | 65315029  | 65315363  | - | 2.46  | 592   | 100737668 | CENPC    | 65237825  | 65315788  |
| NC_010450.4 | 117889200 | 117889675 | + | 3.88  | 469   | 100626792 | CENPE    | 117888968 | 117965325 |
| NC_010451.4 | 129011907 | 129012195 | - | 0.88  | 190   | 100521032 | CENPF    | 128948386 | 129012241 |
| NC_010451.4 | 129010559 | 129010847 | - | 0.88  | 1538  | 100521032 | CENPF    | 128948386 | 129012241 |
| NC_010458.4 | 47353387  | 47353743  | + | 2.88  | 246   | 100736772 | CENPH    | 47353319  | 47378746  |
| NC_010449.5 | 43624581  | 43624889  | + | 1.68  | 1     | 100513550 | CENPQ    | 43624734  | 43639907  |
| NC_010457.5 | 45851407  | 45851695  | - | 1.20  | -92   | 100515416 | CENPU    | 45818562  | 45851459  |
| NC_010443.5 | 122878449 | 122878856 | + | 1.46  | 2188  | 100152345 | CEP152   | 122876464 | 122979851 |
| NC_010448.4 | 42815042  | 42815333  | - | 0.68  | 98    | 100620768 | CEP89    | 42733675  | 42815286  |

|             |           |           |   |       |       |           |         |           |           |
|-------------|-----------|-----------|---|-------|-------|-----------|---------|-----------|-----------|
| NC_010455.5 | 157387992 | 157388280 | - | 1.78  | 289   | 100521822 | CEP97   | 157356248 | 157388425 |
| NC_010446.5 | 98252530  | 98252818  | + | 2.78  | 1186  | 100156737 | CERS2   | 98251488  | 98260504  |
| NC_010448.4 | 27632511  | 27632800  | + | 1.01  | 4943  | 100626873 | CES3    | 27627712  | 27637827  |
| NC_010444.4 | 97593362  | 97593747  | - | 2.27  | -234  | 574052    | CETN3   | 97574003  | 97593320  |
| NC_010448.4 | 12226486  | 12226774  | + | 3.05  | 2929  | 100144464 | CFDP1   | 12223701  | 12354180  |
| NC_010449.5 | 86105226  | 86105568  | - | 1.73  | 2489  | 100156869 | CHD2    | 85980759  | 86107886  |
| NC_010455.5 | 35949089  | 35949377  | - | 1.05  | -980  | 100151982 | CHDH    | 35910688  | 35948253  |
| NC_010455.5 | 168569759 | 168570076 | - | 2.46  | -343  | 100516044 | CHMP2B  | 168534950 | 168569574 |
| NC_010446.5 | 54894081  | 54894475  | - | 0.46  | 951   | 100154336 | CHMP4C  | 54860481  | 54895229  |
| NC_010456.5 | 7390182   | 7390470   | + | 0.88  | 260   | 110256869 | CHMP7   | 7390066   | 7403657   |
| NC_010443.5 | 139802304 | 139802592 | - | 1.20  | 2010  | 100520288 | CHSY1   | 139730703 | 139804458 |
| NC_010449.5 | 55798207  | 55798545  | - | 1.78  | 290   | 100157484 | CIB1    | 55794834  | 55798666  |
| NC_010443.5 | 25154507  | 25154825  | + | 2.20  | -986  | 100156022 | CITED2  | 25155652  | 25158517  |
| NC_010448.4 | 170324976 | 170325326 | + | 1.46  | 364   | 100525468 | CITED4  | 170324787 | 170326140 |
| NC_010443.5 | 268642041 | 268642329 | - | 2.46  | -121  | 100157558 | CIZ1    | 268618972 | 268642064 |
| NC_010453.5 | 15751234  | 15751492  | + | 0.24  | -354  | 100515274 | CKAP2   | 15751717  | 15767068  |
| NC_010453.5 | 15750609  | 15750897  | + | 1.05  | -964  | 100515274 | CKAP2   | 15751717  | 15767068  |
| NC_010453.5 | 15752396  | 15752684  | + | 2.46  | 823   | 100515274 | CKAP2   | 15751717  | 15767068  |
| NC_010446.5 | 94819408  | 94819742  | - | 2.78  | 8     | 100155110 | CKS1B   | 94815769  | 94819583  |
| NC_010455.5 | 19509585  | 19510008  | - | 2.14  | 781   | 100512630 | CLASP2  | 19305430  | 19510578  |
| NC_010446.5 | 129652723 | 129653274 | - | 1.92  | 2386  | 397284    | CLCA1   | 129621259 | 129655385 |
| NC_010446.5 | 111081083 | 111081371 | + | 2.27  | 575   | 100155876 | CLCC1   | 111080652 | 111101007 |
| NC_010459.5 | 481865    | 482153    | - | 1.88  | 2677  | 100156235 | CLDN23  | 483635    | 484686    |
| NC_010455.5 | 160396836 | 160397194 | + | 2.46  | -429  | 100154619 | CLDND1  | 160397444 | 160405675 |
| NC_010454.4 | 48761779  | 48762076  | - | 2.78  | -1972 | 100513375 | CLUH    | 48740117  | 48759955  |
| NC_010445.4 | 128900572 | 128900803 | + | -2.12 | -2707 | 100623872 | CMPK2   | 128903395 | 128917873 |
| NC_010448.4 | 27392845  | 27393167  | - | 1.29  | -1528 | 110260935 | CMTM4   | 27319074  | 27391478  |
| NC_010446.5 | 122505450 | 122505681 | + | -1.12 | 1115  | 100049656 | CNN3    | 122504450 | 122528351 |
| NC_010445.4 | 56811538  | 56811826  | - | 0.46  | 434   | 100512161 | CNNM3   | 56792389  | 56812116  |
| NC_010450.4 | 73304649  | 73304947  | - | 2.46  | 96    | 100512848 | CNOT6L  | 73191721  | 73304894  |
| NC_010449.5 | 68598678  | 68598966  | - | 3.05  | -3680 | 100624179 | COCH    | 68580124  | 68595142  |
| NC_010445.4 | 22740849  | 22741137  | + | 1.46  | 568   | 100627695 | COG7    | 22740425  | 22826589  |
| NC_010446.5 | 20143517  | 20143805  | - | 3.37  | 79    | 100622782 | COLEC10 | 19692990  | 20143740  |
| NC_010445.4 | 131257798 | 131258086 | - | 2.20  | -3387 | 100736753 | COLEC11 | 131226941 | 131254555 |

|             |           |           |   |       |       |           |         |           |           |
|-------------|-----------|-----------|---|-------|-------|-----------|---------|-----------|-----------|
| NC_010445.4 | 79913787  | 79914075  | - | 2.20  | 38    | 100521368 | COMMD1  | 79770315  | 79913969  |
| NC_010444.4 | 58931151  | 58931611  | + | 2.78  | 452   | 100525632 | COPE    | 58930929  | 58948466  |
| NC_010454.4 | 61002323  | 61002611  | + | 1.20  | 1905  | 100512312 | COPS3   | 61000562  | 61023916  |
| NC_010446.5 | 67740499  | 67740765  | + | -1.76 | 104   | 100125955 | COPS5   | 67740528  | 67750351  |
| NC_010447.5 | 19522805  | 19523093  | + | 2.05  | 382   | 100156765 | COPZ1   | 19522567  | 19542373  |
| NC_010457.5 | 101339095 | 101339357 | + | -0.95 | 1214  | 100152647 | COQ10B  | 101338012 | 101354714 |
| NC_010443.5 | 268756367 | 268756752 | + | -1.93 | -149  | 100156776 | COQ4    | 268756709 | 268768355 |
| NC_010443.5 | 240001303 | 240001534 | - | -1.27 | -454  | 100511910 | CORO2A  | 239947299 | 240000964 |
| NC_010443.5 | 90696945  | 90697188  | + | -1.35 | 320   | 100038000 | COX7A2  | 90696746  | 90703407  |
| NC_010450.4 | 10403558  | 10403873  | + | 1.46  | 18    | 100462674 | CPEB2   | 10403697  | 10472141  |
| NC_010456.5 | 103838550 | 103838857 | - | 2.46  | -1808 | 100152117 | CPEB3   | 103675333 | 103836895 |
| NC_010456.5 | 103838133 | 103838421 | - | 1.88  | -1382 | 100152117 | CPEB3   | 103675333 | 103836895 |
| NC_010447.5 | 33263987  | 33264281  | - | 1.78  | 228   | 100628221 | CPM     | 33170094  | 33264362  |
| NC_010455.5 | 131340827 | 131341115 | - | 1.05  | -3250 | 100627569 | CPN2    | 131327508 | 131337721 |
| NC_010457.5 | 110164517 | 110164805 | + | 0.88  | -3951 | 100155330 | CPO     | 110168612 | 110194156 |
| NC_010445.4 | 30363195  | 30363605  | + | -0.02 | 675   | 100627178 | CPPED1  | 30362725  | 30484250  |
| NC_010457.5 | 113213349 | 113213580 | + | -1.71 | 3426  | 100157716 | CPS1    | 113210038 | 113339086 |
| NC_010457.5 | 113209203 | 113209665 | + | 0.82  | -604  | 100157716 | CPS1    | 113210038 | 113339086 |
| NC_010445.4 | 6374793   | 6375081   | + | 2.46  | 575   | 100518830 | CPSF4   | 6374362   | 6388662   |
| NC_010447.5 | 33528079  | 33528310  | + | 0.63  | 2526  | 100152191 | CPSF6   | 33525668  | 33559941  |
| NC_010455.5 | 59759630  | 59759918  | - | 3.20  | -1998 | 100737786 | CRBN    | 59733503  | 59757776  |
| NC_010445.4 | 16619263  | 16619661  | - | 0.46  | 2543  | 100517396 | CRCP    | 16584304  | 16622005  |
| NC_010458.4 | 51212928  | 51213358  | - | 3.63  | -3194 | 100523409 | CREBRF  | 51146015  | 51209949  |
| NC_010445.4 | 52914216  | 52914619  | + | -1.08 | -4057 | 100517088 | CREG2   | 52918475  | 52978020  |
| NC_010445.4 | 93926042  | 93926363  | - | 1.05  | -286  | 100524556 | CRIPT   | 93913579  | 93925916  |
| NC_010445.4 | 93929789  | 93930062  | - | 0.05  | -4009 | 100524556 | CRIPT   | 93913579  | 93925916  |
| NC_010459.5 | 14860723  | 14861241  | + | 1.46  | 663   | 100153088 | CRLS1   | 14860319  | 14892436  |
| NC_010449.5 | 53146895  | 53147183  | + | 0.88  | 722   | 100621206 | CRTC3   | 53146317  | 53255985  |
| NC_010444.4 | 16624158  | 16624389  | - | -0.54 | -3937 | 100517750 | CRY2    | 16587101  | 16620336  |
| NC_010445.4 | 24814063  | 24814351  | + | 2.88  | -803  | 100525333 | CRYM    | 24815010  | 24835837  |
| NC_010448.4 | 138434442 | 138434829 | + | 0.61  | -324  | 733653    | CRYZ    | 138434960 | 138461042 |
| NC_010446.5 | 24852275  | 24852506  | + | -0.35 | -2929 | 100621741 | CSMD3   | 24855320  | 25871456  |
| NC_010443.5 | 107689152 | 107689440 | + | 2.29  | -754  | 100157196 | CSNK1G1 | 107690050 | 107884054 |
| NC_010444.4 | 127017898 | 127018241 | + | 2.29  | 1041  | 100511866 | CSNK1G3 | 127017028 | 127129547 |

|             |           |           |   |       |       |           |         |           |           |
|-------------|-----------|-----------|---|-------|-------|-----------|---------|-----------|-----------|
| NC_010448.4 | 129175031 | 129175339 | + | -2.67 | 1786  | 100523254 | CTBS    | 129173399 | 129207868 |
| NC_010443.5 | 145811691 | 145812037 | - | 4.05  | -191  | 100158188 | CTDP1   | 145769771 | 145811673 |
| NC_010443.5 | 127124615 | 127124970 | - | 0.36  | 954   | 102162809 | CTDSPL2 | 127029445 | 127125747 |
| NC_010444.4 | 48728283  | 48728659  | - | -1.02 | 1009  | 100627268 | CTR9    | 48700629  | 48729480  |
| NC_010457.5 | 126285661 | 126285949 | - | 2.46  | 1343  | 100511787 | CUL3    | 126191605 | 126287148 |
| NC_010448.4 | 34120836  | 34121176  | - | 3.27  | -513  | 100624570 | CYLD    | 34058091  | 34120493  |
| NC_010456.5 | 106666975 | 106667276 | + | -0.86 | 680   | 403111    | CYP2C42 | 106666445 | 106701809 |
| NC_010449.5 | 41424896  | 41425250  | - | -2.71 | 781   | 100113410 | CYP39A1 | 41345011  | 41425854  |
| NC_010449.5 | 35128129  | 35128417  | + | 1.88  | 1028  | 100155713 | DAAM2   | 35127245  | 35285933  |
| NC_010455.5 | 78969045  | 78969371  | - | -0.24 | 1042  | 106505697 | DBR1    | 78958301  | 78970250  |
| NC_010446.5 | 117884427 | 117884735 | + | 1.78  | -172  | 100156530 | DBT     | 117884753 | 117924006 |
| NC_010454.4 | 18344428  | 18344719  | + | 1.36  | 543   | 100521290 | DCAKD   | 18344030  | 18362516  |
| NC_010452.4 | 46815102  | 46815333  | + | -0.35 | -4798 | 100512855 | DCLRE1C | 46820016  | 46863848  |
| NC_010444.4 | 116803910 | 116804141 | - | -1.67 | 667   | 100516785 | DCP2    | 116736800 | 116804693 |
| NC_010444.4 | 116803571 | 116803802 | - | 1.46  | 1006  | 100516785 | DCP2    | 116736800 | 116804693 |
| NC_010444.4 | 151712861 | 151713411 | - | 0.32  | 787   | 100626043 | DCTN4   | 151681003 | 151713923 |
| NC_010449.5 | 23367425  | 23367656  | + | -0.86 | -3817 | 100144462 | DDR1    | 23371358  | 23391579  |
| NC_010445.4 | 121855646 | 121856013 | - | 4.05  | 837   | 100627404 | DDX1    | 121818400 | 121856667 |
| NC_010447.5 | 67364509  | 67364797  | + | 3.46  | 855   | 100515028 | DDX11   | 67363798  | 67395739  |
| NC_010447.5 | 9487086   | 9487545   | + | 1.46  | 1523  | 100514347 | DDX17   | 9485792   | 9505157   |
| NC_010456.5 | 72039970  | 72040460  | + | 2.10  | 230   | 100153111 | DDX21   | 72039985  | 72063778  |
| NC_010444.4 | 64840467  | 64840794  | + | 3.05  | 4590  | 100515361 | DDX39A  | 64836040  | 64844996  |
| NC_010454.4 | 14573819  | 14574050  | + | -0.35 | 1203  | 102158045 | DDX5    | 14572731  | 14580740  |
| NC_010456.5 | 21083906  | 21084194  | + | 4.05  | 849   | 100158037 | DDX60   | 21083201  | 21157001  |
| NC_010446.5 | 89313089  | 89313377  | + | 2.46  | 1925  | 100156474 | DEDD    | 89311308  | 89323692  |
| NC_010448.4 | 49711808  | 49712180  | + | 1.10  | 1046  | 100516271 | DEDD2   | 49710948  | 49730457  |
| NC_010443.5 | 203599991 | 203600334 | - | 1.78  | 1135  | 100154094 | DENND4C | 203449832 | 203601298 |
| NC_010447.5 | 42643371  | 42643659  | + | 2.05  | 838   | 102165384 | DENND5B | 42642677  | 42870980  |
| NC_010448.4 | 144157251 | 144157984 | + | 1.78  | 48    | 110261209 | DEPDC1  | 144157569 | 144183977 |
| NC_010447.5 | 83877353  | 83877943  | + | 1.00  | -1070 | 100511197 | DEPDC4  | 83878718  | 83899408  |
| NC_010444.4 | 27929026  | 27929314  | - | 2.20  | -311  | 100621764 | DEPDC7  | 27909282  | 27928859  |
| NC_010446.5 | 19179660  | 19180251  | - | 2.20  | 175   | 100157658 | DEPTOR  | 18976732  | 19180131  |
| NC_010446.5 | 16309820  | 16310108  | + | -0.12 | -2672 | 100626802 | DERL1   | 16312636  | 16341405  |
| NC_010457.5 | 84159795  | 84160136  | + | 3.31  | 2101  | 100518993 | DFNB59  | 84157864  | 84165763  |

|             |           |           |   |       |       |           |         |           |           |
|-------------|-----------|-----------|---|-------|-------|-----------|---------|-----------|-----------|
| NC_010456.5 | 51657491  | 51657865  | - | 3.27  | -327  | 110256627 | DGCR6L  | 51644840  | 51657351  |
| NC_010453.5 | 24973995  | 24974301  | - | 2.20  | -3220 | 100157742 | DGKH    | 24772396  | 24970928  |
| NC_010455.5 | 30601777  | 30602065  | + | 3.05  | -118  | 100518989 | DHX30   | 30602039  | 30632506  |
| NC_010455.5 | 94349372  | 94349603  | - | -1.86 | 845   | 100626674 | DHX36   | 94298790  | 94350333  |
| NC_010451.4 | 124142304 | 124142924 | + | 1.78  | 646   | 100514066 | DHX9    | 124141968 | 124183838 |
| NC_010461.5 | 78603832  | 78604063  | + | -2.44 | 1562  | 100155257 | DIAPH2  | 78602385  | 79520441  |
| NC_010453.5 | 32994627  | 32994915  | - | 3.78  | 83    | 100737986 | DIAPH3  | 32492735  | 32994854  |
| NC_010455.5 | 137737106 | 137737394 | - | 3.05  | 1864  | 100519567 | DIRC2   | 137633471 | 137739114 |
| NC_010453.5 | 45075701  | 45076028  | - | 2.78  | 108   | 100521470 | DIS3    | 45046040  | 45075973  |
| NC_010443.5 | 130960526 | 130961111 | - | 2.20  | 1961  | 100156025 | DISP2   | 130931909 | 130962780 |
| NC_010451.4 | 107642728 | 107642967 | + | 0.46  | 718   | 397129    | DLD     | 107642129 | 107668443 |
| NC_010443.5 | 184550487 | 184550718 | - | 0.46  | -574  | 100511173 | DLGAP5  | 184500791 | 184550028 |
| NC_010443.5 | 184548789 | 184549433 | - | 2.66  | 917   | 100511173 | DLGAP5  | 184500791 | 184550028 |
| NC_010445.4 | 37918409  | 37918948  | - | 1.10  | 425   | 100624182 | DNAJA3  | 37883233  | 37919104  |
| NC_010444.4 | 64762328  | 64762623  | + | 1.88  | 803   | 396741    | DNAJB1  | 64761672  | 64764482  |
| NC_010456.5 | 75188833  | 75189418  | - | 1.46  | 983   | 100156234 | DNAJB12 | 75169076  | 75190109  |
| NC_010448.4 | 135265067 | 135265355 | - | 2.46  | -4886 | 100525703 | DNAJB4  | 135243927 | 135260325 |
| NC_010443.5 | 235789924 | 235790237 | + | -1.54 | -3302 | 100525553 | DNAJB5  | 235793383 | 235799385 |
| NC_010452.4 | 52864588  | 52864874  | + | -0.95 | 1918  | 100519794 | DNAJC1  | 52862813  | 53060747  |
| NC_010452.4 | 52863689  | 52863984  | + | 1.95  | 1023  | 100519794 | DNAJC1  | 52862813  | 53060747  |
| NC_010455.5 | 118912988 | 118913276 | - | 1.88  | 138   | 100154656 | DNAJC19 | 118907299 | 118913270 |
| NC_010445.4 | 38646562  | 38646987  | - | 0.88  | 77    | 397051    | DNASE1  | 38590045  | 38646852  |
| NC_010451.4 | 114261514 | 114261802 | + | 2.27  | -1161 | 100622420 | DNM3    | 114262819 | 114607232 |
| NC_010446.5 | 123394991 | 123395279 | + | 2.05  | 364   | 100157622 | DNTTIP2 | 123394771 | 123408460 |
| NC_010456.5 | 6180229   | 6180517   | - | 2.46  | 522   | 100152025 | DOK2    | 6176487   | 6180895   |
| NC_010443.5 | 153396197 | 153396498 | - | 1.61  | -2915 | 100517871 | DOK6    | 152990887 | 153393432 |
| NC_010446.5 | 94662204  | 94662589  | + | 2.22  | 828   | 100153065 | DPM3    | 94661568  | 94662223  |
| NC_010444.4 | 5946264   | 5946596   | - | 1.46  | 1589  | 100519350 | DPP3    | 5907251   | 5948019   |
| NC_010457.5 | 68742943  | 68743231  | - | 1.78  | -126  | 397492    | DPP4    | 68661764  | 68742961  |
| NC_010446.5 | 123835000 | 123835351 | - | 1.05  | 699   | 100152776 | DR1     | 123815088 | 123835875 |
| NC_010448.4 | 115401517 | 115401934 | + | 1.14  | 1502  | 100625833 | DSG2    | 115400223 | 115453763 |
| NC_010457.5 | 88549388  | 88549975  | + | 1.56  | 431   | 100523472 | DUSP19  | 88549250  | 88574978  |
| NC_010456.5 | 120906460 | 120906748 | + | 3.20  | 264   | 100157144 | DUSP5   | 120906340 | 120919398 |
| NC_010455.5 | 122076607 | 122076995 | + | 1.27  | 947   | 100621038 | DVL3    | 122075854 | 122092975 |

|             |           |           |   |       |       |           |           |           |           |
|-------------|-----------|-----------|---|-------|-------|-----------|-----------|-----------|-----------|
| NC_010451.4 | 75451391  | 75451625  | + | -0.35 | 4412  | 100523985 | DYNC1I1   | 75447096  | 75760522  |
| NC_010457.5 | 77803281  | 77803569  | + | 0.73  | -176  | 100154566 | DYNC1I2   | 77803601  | 77859559  |
| NC_010457.5 | 77804528  | 77805251  | + | 1.46  | 1288  | 100154566 | DYNC1I2   | 77803601  | 77859559  |
| NC_010448.4 | 7661052   | 7661340   | - | 2.68  | 184   | 102165562 | DYNLRB2   | 7650444   | 7661380   |
| NC_010457.5 | 109972902 | 109973242 | - | 2.20  | 3316  | 100517128 | DYTN      | 109918321 | 109976388 |
| NC_010453.5 | 65205787  | 65206018  | - | -0.44 | -1608 | 100519383 | DZIP1     | 65147003  | 65204294  |
| NC_010455.5 | 2655595   | 2655883   | + | -0.86 | 910   | 100517678 | EAF1      | 2654829   | 2671140   |
| NC_010445.4 | 22655604  | 22655911  | + | -0.12 | 342   | 100523812 | EARS2     | 22655415  | 22684246  |
| NC_010461.5 | 55771121  | 55771429  | + | 1.78  | 317   | 100518887 | EDA       | 55770958  | 56103296  |
| NC_010456.5 | 135046779 | 135047067 | + | 0.88  | 4841  | 100522106 | EDRF1     | 135042082 | 135085552 |
| NC_010447.5 | 90132622  | 90132910  | + | 1.78  | 1059  | 100153403 | EEA1      | 90131707  | 90257014  |
| NC_010447.5 | 90131503  | 90131903  | + | 3.05  | -4    | 100153403 | EEA1      | 90131707  | 90257014  |
| NC_010456.5 | 134152136 | 134152367 | - | -1.71 | 2414  | 100521159 | EEF1AKMT2 | 134134899 | 134154666 |
| NC_010448.4 | 164777680 | 164778077 | + | 2.05  | -97   | 100526227 | EFCAB14   | 164777976 | 164821371 |
| NC_010444.4 | 6454841   | 6455129   | + | 3.05  | -170  | 100526031 | EFEMP2    | 6455155   | 6463493   |
| NC_010446.5 | 94670055  | 94670551  | - | 3.27  | 2179  | 100144501 | EFNA1     | 94666457  | 94672482  |
| NC_010453.5 | 74233920  | 74234208  | - | 3.46  | -1296 | 100135673 | EFNB2     | 74188337  | 74232768  |
| NC_010446.5 | 9136602   | 9136964   | - | 1.27  | 469   | 100627646 | EFR3A     | 9053445   | 9137252   |
| NC_010456.5 | 59114785  | 59115119  | + | 2.20  | 1416  | 100153461 | EGLN1     | 59113536  | 59168421  |
| NC_010456.5 | 66289232  | 66289549  | - | 1.63  | 1917  | 100038004 | EGR2      | 66280665  | 66291308  |
| NC_010445.4 | 79256675  | 79256978  | - | -2.86 | 933   | 100520668 | EHBP1     | 78907315  | 79257760  |
| NC_010443.5 | 131355929 | 131356160 | - | -2.93 | -819  | 100621160 | EIF2AK4   | 131244818 | 131355225 |
| NC_010456.5 | 129006066 | 129006297 | - | -0.12 | 986   | 100156570 | EIF3A     | 128967645 | 129007168 |
| NC_010456.5 | 129005004 | 129005292 | - | 2.27  | 2020  | 100156570 | EIF3A     | 128967645 | 129007168 |
| NC_010447.5 | 11213430  | 11213859  | + | 3.63  | 332   | 100512835 | EIF3D     | 11213312  | 11229158  |
| NC_010446.5 | 29288810  | 29289102  | + | -2.12 | 78    | 100156671 | EIF3E     | 29288878  | 29343593  |
| NC_010448.4 | 47476302  | 47476590  | + | 1.46  | 258   | 100517098 | EIF3K     | 47476188  | 47488933  |
| NC_010444.4 | 28281906  | 28282194  | - | 0.73  | 762   | 100513781 | EIF3M     | 28258399  | 28282812  |
| NC_010455.5 | 124585128 | 124585359 | + | -1.93 | 2421  | 100101928 | EIF4A2    | 124582822 | 124589296 |
| NC_010455.5 | 124582323 | 124583035 | + | -0.27 | -143  | 100101928 | EIF4A2    | 124582822 | 124589296 |
| NC_010445.4 | 11322753  | 11323229  | + | 1.29  | 1505  | 100627717 | EIF4H     | 11321486  | 11348473  |
| NC_010455.5 | 109527949 | 109528237 | - | 3.20  | 2357  | 106505742 | EIF5A2    | 109510815 | 109530450 |
| NC_010444.4 | 70134954  | 70135242  | - | 1.46  | -750  | 100515074 | ELAVL3    | 70114475  | 70134348  |
| NC_010450.4 | 87855835  | 87856173  | + | 2.88  | 2977  | 100514064 | ELF2      | 87853027  | 87878847  |

|                |           |           |   |       |       |           |        |           |           |
|----------------|-----------|-----------|---|-------|-------|-----------|--------|-----------|-----------|
| NC_010444.4    | 102590802 | 102591090 | - | 0.29  | 470   | 100523777 | ELL2   | 102518605 | 102591416 |
| NC_010446.5    | 61970093  | 61970381  | + | 1.29  | -866  | 100153381 | ELOC   | 61971103  | 61989392  |
| NC_010450.4    | 112038919 | 112039207 | + | 4.27  | 393   | 100312970 | ELOVL6 | 112038670 | 112190075 |
| NC_010458.4    | 39678231  | 39678462  | - | -1.93 | 1395  | 100524592 | ELOVL7 | 39588122  | 39679742  |
| NC_010444.4    | 29229420  | 29229651  | - | -2.67 | 556   | 100514702 | ELP4   | 29119345  | 29230092  |
| NC_010449.5    | 110702497 | 110702815 | - | -0.54 | 2796  | 100153276 | EML5   | 110511937 | 110705452 |
| NC_010452.4    | 13498876  | 13499180  | - | 3.05  | 2911  | 100525245 | ENAH   | 13439772  | 13501939  |
| NC_010453.5    | 23234648  | 23234888  | + | -1.12 | 4     | 100525605 | ENOX1  | 23234764  | 23894763  |
| NC_010446.5    | 28199106  | 28199445  | - | -0.12 | 4273  | 100153859 | ENY2   | 28193634  | 28203549  |
| NC_010446.5    | 28203223  | 28203568  | - | 1.68  | 153   | 100153859 | ENY2   | 28193634  | 28203549  |
| NC_010447.5    | 7395797   | 7396085   | - | 2.05  | -1426 | 100156226 | EP300  | 7311165   | 7394515   |
| NC_010447.5    | 7392135   | 7392697   | - | 1.00  | 2099  | 100156226 | EP300  | 7311165   | 7394515   |
| NC_010457.5    | 3524676   | 3525119   | - | 1.27  | 1325  | 100518870 | EPC2   | 3417446   | 3526223   |
| NC_010445.4    | 93183781  | 93184221  | - | 0.29  | 1220  | 403163    | EPCAM  | 93169800  | 93185221  |
| NC_010443.5    | 95615262  | 95615539  | - | -1.12 | 1393  | 100518639 | EPG5   | 95493779  | 95616794  |
| NC_010448.4    | 75278108  | 75278396  | - | 2.05  | 1112  | 100522873 | EPHA2  | 75251465  | 75279364  |
| NC_010453.5    | 24121019  | 24121250  | + | -1.12 | 4143  | 100625050 | EPSTI1 | 24116991  | 24216219  |
| NC_010454.4    | 45082819  | 45083107  | + | 1.46  | 32    | 100518578 | ERAL1  | 45082931  | 45088674  |
| NC_010454.4    | 45085437  | 45085725  | + | 4.05  | 2650  | 100518578 | ERAL1  | 45082931  | 45088674  |
| NC_010447.5    | 21474602  | 21474892  | + | 1.88  | 529   | 100525045 | ERBB3  | 21474218  | 21495040  |
| NC_010449.5    | 93083393  | 93083765  | - | 1.78  | 371   | 100152505 | ERH    | 93068254  | 93083950  |
| NC_010448.4    | 106787435 | 106788089 | - | 2.46  | 1683  | 100524501 | ESCO1  | 106697975 | 106789445 |
| NC_010446.5    | 42061530  | 42061818  | - | 1.46  | 32    | 100512961 | ESRP1  | 41993944  | 42061706  |
| NC_010447.5    | 21518868  | 21519156  | + | 2.05  | 1056  | 100519485 | ESYT1  | 21517956  | 21535320  |
| NC_010447.5    | 60775124  | 60775407  | - | -2.12 | 1525  | 100157726 | ETV6   | 60523530  | 60776791  |
| NC_010447.5    | 60777258  | 60777757  | - | 1.05  | -716  | 100157726 | ETV6   | 60523530  | 60776791  |
| NC_010446.5    | 124408579 | 124408867 | + | 1.78  | 4208  | 100519143 | EVI5   | 124404515 | 124600580 |
| NC_010456.5    | 46408523  | 46408811  | + | 1.78  | 31    | 100156911 | EWSR1  | 46408636  | 46439357  |
| NC_010443.5    | 270748651 | 270749047 | + | 1.27  | 315   | 100523112 | EXOSC2 | 270748534 | 270757717 |
| NC_010446.5    | 20649202  | 20649440  | + | -1.54 | 4319  | 100157655 | EXT1   | 20645002  | 20935769  |
| NC_010459.5    | 9075754   | 9075985   | - | -1.67 | -2317 | 110257404 | F11    | 9045990   | 9073552   |
| NW_018085100.1 | 2586336   | 2586686   | + | 1.61  | 4568  | 100627330 | F13B   | 2581943   | 2614678   |
| NC_010450.4    | 104465466 | 104465697 | + | -2.12 | 1239  | 595106    | FABP2  | 104464342 | 104468059 |
| NC_010448.4    | 161206505 | 161206793 | + | 2.14  | 1296  | 100518974 | FAF1   | 161205353 | 161603727 |



|             |           |           |   |       |       |           |          |           |           |
|-------------|-----------|-----------|---|-------|-------|-----------|----------|-----------|-----------|
| NC_010458.4 | 69123335  | 69123623  | + | 2.27  | 1734  | 100511051 | FAM114A2 | 69121745  | 69159398  |
| NC_010451.4 | 91821251  | 91821634  | - | 1.68  | 186   | 100620255 | FAM126A  | 91729044  | 91821629  |
| NC_010461.5 | 76150010  | 76150241  | + | 1.14  | -113  | 100519754 | FAM133A  | 76150239  | 76181971  |
| NC_010444.4 | 89112862  | 89113281  | + | -3.22 | 3693  | 100511985 | FAM151B  | 89109378  | 89144270  |
| NC_010455.5 | 138148780 | 138149011 | - | -0.93 | 2816  | 100627352 | FAM162A  | 138115499 | 138151712 |
| NC_010444.4 | 100893880 | 100894168 | - | 0.14  | -436  | 100521436 | FAM172A  | 100477770 | 100893588 |
| NC_010443.5 | 144783191 | 144783423 | - | -0.95 | 4784  | 110261534 | FAM189A1 | 144316119 | 144788091 |
| NC_010458.4 | 53935322  | 53935553  | + | -2.12 | -4049 | 100511664 | FAM196B  | 53939487  | 54057671  |
| NC_010455.5 | 49445961  | 49446192  | + | -1.35 | 2350  | 100522704 | FAM19A1  | 49443726  | 49970760  |
| NC_010450.4 | 10990741  | 10991029  | + | -0.54 | -263  | 102160065 | FAM200B  | 10991148  | 11004815  |
| NC_010455.5 | 207557618 | 207557906 | + | 1.05  | -3118 | 100623984 | FAM207A  | 207560880 | 207588502 |
| NC_010455.5 | 29570931  | 29571260  | + | 2.68  | 1039  | 106505592 | FAM240A  | 29570056  | 29574895  |
| NC_010455.5 | 29572028  | 29572259  | + | -0.12 | 2087  | 106505592 | FAM240A  | 29570056  | 29574895  |
| NC_010443.5 | 82086672  | 82086960  | + | 1.05  | 869   | 100158219 | FAM26F   | 82085947  | 82087897  |
| NC_010455.5 | 204746650 | 204746983 | + | 2.68  | -2336 | 100517916 | FAM3B    | 204749153 | 204796792 |
| NC_010448.4 | 84308580  | 84308871  | - | 2.20  | 2231  | 100511570 | FAM46B   | 84303495  | 84310957  |
| NC_010445.4 | 120968329 | 120968617 | + | 3.78  | 457   | 100518011 | FAM49A   | 120968016 | 121069372 |
| NC_010451.4 | 27813566  | 27813854  | - | 3.46  | -292  | 100517546 | FAM76B   | 27790139  | 27813418  |
| NC_010445.4 | 122717533 | 122717764 | - | -0.44 | 3308  | 100518964 | FAM84A   | 122716029 | 122720957 |
| NC_010446.5 | 13446921  | 13447296  | + | 3.05  | 1825  | 100623936 | FAM84B   | 13445283  | 13451329  |
| NC_010443.5 | 132819123 | 132819411 | - | 1.73  | 24    | 100522915 | FAM98B   | 132786198 | 132819291 |
| NC_010452.4 | 26796856  | 26797358  | + | 2.29  | 255   | 102158362 | FANCC    | 26796852  | 27055271  |
| NC_010452.4 | 26795694  | 26795925  | + | -1.54 | -1042 | 102158362 | FANCC    | 26796852  | 27055271  |
| NC_010452.4 | 27584019  | 27584250  | + | -1.35 | -4474 | 397038    | FBP1     | 27588609  | 27622225  |
| NC_010445.4 | 17744123  | 17744411  | - | 1.61  | -456  | 102159616 | FBRS     | 17731276  | 17743811  |
| NC_010444.4 | 113478500 | 113478801 | - | -2.44 | 1913  | 100513341 | FBXL17   | 112989134 | 113480564 |
| NC_010443.5 | 65934615  | 65934903  | - | 2.31  | 944   | 100156082 | FBXL4    | 65872119  | 65935703  |
| NC_010443.5 | 65937570  | 65937822  | - | -1.35 | -1993 | 100156082 | FBXL4    | 65872119  | 65935703  |
| NC_010443.5 | 65936340  | 65936796  | - | 2.27  | -865  | 100156082 | FBXL4    | 65872119  | 65935703  |
| NC_010443.5 | 65935654  | 65936039  | - | 0.36  | -143  | 100156082 | FBXL4    | 65872119  | 65935703  |
| NC_010445.4 | 92697858  | 92698146  | + | 1.46  | 1600  | 100624629 | FBXO11   | 92696402  | 92792623  |
| NC_010443.5 | 149856644 | 149856946 | + | 1.05  | 763   | 100516237 | FBXO15   | 149856032 | 149897309 |
| NC_010443.5 | 184667465 | 184667753 | + | 1.46  | 1749  | 100511360 | FBXO34   | 184665860 | 184689953 |
| NC_010458.4 | 26708115  | 26708489  | + | 0.78  | 832   | 100522958 | FBXO4    | 26707470  | 26723765  |

|                |           |           |   |       |       |           |         |           |           |
|----------------|-----------|-----------|---|-------|-------|-----------|---------|-----------|-----------|
| NC_010444.4    | 82100934  | 82101165  | + | -1.12 | -245  | 100514094 | FCHO2   | 82101295  | 82248410  |
| NC_010459.5    | 15137893  | 15138242  | - | 2.68  | -534  | 100157961 | FERMT1  | 15080585  | 15137533  |
| NC_010443.5    | 182608746 | 182609024 | - | -1.27 | -1995 | 100517989 | FERMT2  | 182519681 | 182606890 |
| NC_010453.5    | 70858022  | 70858253  | - | 0.14  | 1279  | 100156844 | FGF14   | 70251374  | 70859417  |
| NC_010445.4    | 49417757  | 49418051  | + | 2.46  | 2173  | 100513532 | FHL2    | 49415731  | 49448459  |
| NC_010444.4    | 33327124  | 33327355  | - | 1.05  | 4512  | 100620302 | FIBIN   | 33328250  | 33331752  |
| NC_010444.4    | 33331731  | 33332039  | - | 2.27  | -133  | 100620302 | FIBIN   | 33328250  | 33331752  |
| NC_010444.4    | 6440296   | 6440584   | + | 1.05  | -43   | 100525557 | FIBP    | 6440483   | 6445927   |
| NC_010443.5    | 75694291  | 75694689  | + | 2.31  | 301   | 100511669 | FIG4    | 75694189  | 75792976  |
| NC_010449.5    | 31548139  | 31548427  | - | 1.78  | 1707  | 100155423 | FKBP5   | 31441765  | 31549990  |
| NC_010457.5    | 84182310  | 84182857  | - | 1.20  | 286   | 100144630 | FKBP7   | 84168483  | 84182870  |
| NC_010459.5    | 22953938  | 22954379  | - | 2.63  | 1117  | 100158214 | FLRT3   | 22940491  | 22955276  |
| NC_010453.5    | 5427323   | 5427611   | - | 3.20  | 2631  | 100515445 | FLT3    | 5370475   | 5430098   |
| NC_010446.5    | 123775814 | 123776045 | - | -0.35 | 3710  | 100157977 | FNBP1L  | 123675062 | 123779640 |
| NC_010445.4    | 110841152 | 110841440 | - | 2.05  | 1420  | 100623777 | FOSL2   | 110820403 | 110842716 |
| NC_010449.5    | 62475653  | 62475975  | + | 2.78  | 4581  | 100156502 | FOXA1   | 62471233  | 62479638  |
| NC_010459.5    | 30002484  | 30003029  | - | 0.73  | -1945 | 100513828 | FOXA2   | 29997397  | 30000811  |
| NC_010454.4    | 5308035   | 5308335   | + | 3.78  | 815   | 100623071 | FOXJ1   | 5307370   | 5312117   |
| NC_010447.5    | 63062643  | 63062931  | + | 1.20  | 809   | 100625827 | FOXJ2   | 63061978  | 63087689  |
| NC_010461.5    | 42609374  | 42609662  | + | 2.46  | -42   | 100431100 | FTSJ1   | 42609560  | 42620157  |
| NC_010448.4    | 135282298 | 135283081 | + | -1.80 | 1215  | 100525995 | FUBP1   | 135281474 | 135318715 |
| NW_018085072.1 | 117172    | 117421    | - | 0.46  | -920  | 100625870 | FUT10   | 34820     | 116376    |
| NC_010451.4    | 20721048  | 20721336  | - | 3.46  | 268   | 100520319 | FZD4    | 20714995  | 20721460  |
| NC_010446.5    | 33846803  | 33847150  | - | 3.37  | -2420 | 100157360 | FZD6    | 33811159  | 33844556  |
| NC_010452.4    | 58093033  | 58093321  | - | 0.88  | 3613  | 110255708 | FZD8    | 58093980  | 58096790  |
| NC_010452.4    | 58096734  | 58097022  | - | 2.46  | -88   | 110255708 | FZD8    | 58093980  | 58096790  |
| NC_010443.5    | 121413557 | 121413871 | + | 2.68  | 3438  | 100157164 | GABPB1  | 121410276 | 121488165 |
| NC_010443.5    | 121413972 | 121414260 | + | 1.46  | 3840  | 100157164 | GABPB1  | 121410276 | 121488165 |
| NC_010456.5    | 60139069  | 60139665  | - | 1.53  | 1814  | 100153028 | GALNT2  | 59961279  | 60141181  |
| NC_010455.5    | 144457909 | 144458197 | - | 2.05  | 83    | 100623423 | GAP43   | 144364314 | 144458136 |
| NC_010456.5    | 14886358  | 14886593  | + | -1.12 | 2822  | 397555    | GATA4   | 14883653  | 14938156  |
| NC_010456.5    | 14887702  | 14888017  | + | 1.46  | 4206  | 397555    | GATA4   | 14883653  | 14938156  |
| NC_010459.5    | 46705495  | 46705783  | + | 2.78  | -3621 | 100625236 | GDAP1L1 | 46709260  | 46733275  |
| NC_010447.5    | 21189854  | 21190193  | + | 2.05  | -1364 | 397254    | GDF11   | 21191388  | 21199024  |

|             |           |           |   |       |       |           |          |           |           |
|-------------|-----------|-----------|---|-------|-------|-----------|----------|-----------|-----------|
| NC_010452.4 | 65163907  | 65164237  | + | -1.86 | 3372  | 414427    | GDI2     | 65160700  | 65196447  |
| NC_010458.4 | 68279187  | 68279475  | + | 1.78  | 110   | 100524914 | GEMIN5   | 68279221  | 68330029  |
| NC_010458.4 | 68280168  | 68280456  | + | 2.46  | 1091  | 100524914 | GEMIN5   | 68279221  | 68330029  |
| NC_010445.4 | 73030200  | 73030488  | + | 2.78  | 1594  | 397209    | GFPT1    | 73028750  | 73086191  |
| NC_010445.4 | 73028316  | 73028604  | + | -0.12 | -290  | 397209    | GFPT1    | 73028750  | 73086191  |
| NC_010445.4 | 59202296  | 59202584  | + | 1.46  | 77    | 100620337 | GGCX     | 59202363  | 59219807  |
| NC_010448.4 | 20163184  | 20163501  | + | -1.03 | 1078  | 100512472 | GINS3    | 20162264  | 20170385  |
| NC_010448.4 | 20158492  | 20158723  | + | -2.18 | -3656 | 100512472 | GINS3    | 20162264  | 20170385  |
| NC_010446.5 | 99722477  | 99722765  | - | 3.78  | 2322  | 100736742 | GJA8     | 99721754  | 99724943  |
| NC_010457.5 | 30581075  | 30581306  | - | -1.71 | -918  | 100520334 | GLI2     | 30312543  | 30580272  |
| NC_010447.5 | 38683541  | 38683838  | + | -2.12 | 3206  | 100737573 | GLIPR1L2 | 38680483  | 38710487  |
| NC_010457.5 | 95514822  | 95515335  | + | 2.05  | 1664  | 399525    | GLS      | 95513414  | 95606029  |
| NC_010456.5 | 88006022  | 88006356  | - | 0.24  | -814  | 100157162 | GLUD1    | 87968850  | 88005375  |
| NC_010445.4 | 72619897  | 72620380  | - | -0.41 | -442  | 100511872 | GMCL1    | 72570426  | 72619696  |
| NC_010448.4 | 85657117  | 85657348  | + | -0.12 | -886  | 110261126 | GMEB1    | 85658119  | 85701211  |
| NC_010449.5 | 19585475  | 19585763  | + | 2.46  | -358  | 100515035 | GMNN     | 19585977  | 19595346  |
| NC_010449.5 | 19585962  | 19586250  | + | 1.46  | 129   | 100515035 | GMNN     | 19585977  | 19595346  |
| NC_010451.4 | 100270065 | 100270482 | - | 2.46  | 2000  | 100144419 | GNAI1    | 100187878 | 100272274 |
| NC_010446.5 | 110578940 | 110579228 | - | 1.46  | 247   | 100144421 | GNAI3    | 110527363 | 110579331 |
| NC_010455.5 | 32672125  | 32672413  | + | 2.20  | 892   | 100157237 | GNAT1    | 32671377  | 32678394  |
| NC_010448.4 | 63952518  | 63952806  | - | 2.46  | -66   | 110261346 | GNB1     | 63867155  | 63952596  |
| NC_010448.4 | 129248853 | 129249084 | + | -1.35 | 1644  | 102166994 | GNG5     | 129247324 | 129254973 |
| NC_010456.5 | 59239878  | 59240350  | - | 3.27  | 189   | 100156253 | GNPAT    | 59203519  | 59240303  |
| NC_010456.5 | 22689299  | 22689587  | + | 1.14  | 103   | 100155657 | GOLGA3   | 22689340  | 22738544  |
| NC_010455.5 | 138750237 | 138750468 | + | -2.08 | -4450 | 100620515 | GOLGB1   | 138754803 | 138847254 |
| NC_010455.5 | 106892060 | 106892348 | - | -0.27 | 3005  | 100517915 | GOLIM4   | 106814825 | 106895209 |
| NC_010455.5 | 106892453 | 106892747 | - | -1.60 | 2609  | 100517915 | GOLIM4   | 106814825 | 106895209 |
| NC_010447.5 | 51952286  | 51952544  | - | -2.93 | 899   | 100154676 | GOLT1B   | 51939480  | 51953314  |
| NC_010443.5 | 44238910  | 44239198  | + | 0.14  | -310  | 100520524 | GOPC     | 44239364  | 44285886  |
| NC_010449.5 | 99326313  | 99326544  | + | -2.95 | 844   | 100153141 | GPATCH2L | 99325584  | 99376291  |
| NC_010458.4 | 36218610  | 36218841  | + | -0.54 | 1490  | 100521344 | GPBP1    | 36217235  | 36298003  |
| NC_010458.4 | 36218854  | 36219318  | + | 2.70  | 1851  | 100521344 | GPBP1    | 36217235  | 36298003  |
| NC_010447.5 | 16007689  | 16008035  | + | 1.29  | -317  | 100153250 | GPD1     | 16008179  | 16021676  |
| NC_010457.5 | 80461273  | 80461663  | - | 1.29  | 603   | 100511231 | GPR155   | 80417247  | 80462071  |

|             |           |           |   |       |       |           |         |           |           |
|-------------|-----------|-----------|---|-------|-------|-----------|---------|-----------|-----------|
| NC_010445.4 | 49539644  | 49539875  | - | -1.71 | -3723 | 100736943 | GPR45   | 49531595  | 49536036  |
| NC_010443.5 | 63973445  | 63973882  | - | 3.27  | 751   | 100152431 | GPR63   | 63911304  | 63974415  |
| NC_010445.4 | 87339995  | 87340226  | + | -1.71 | -1509 | 100517153 | GPR75   | 87341620  | 87350664  |
| NC_010447.5 | 59537752  | 59538044  | + | -0.12 | 2985  | 100739328 | GPRC5D  | 59534913  | 59545417  |
| NC_010446.5 | 111164762 | 111165050 | - | 1.73  | 996   | 100518248 | GPSM2   | 111100912 | 111165902 |
| NC_010446.5 | 111161073 | 111161362 | - | 1.46  | 4684  | 100518248 | GPSM2   | 111100912 | 111165902 |
| NC_010446.5 | 111164338 | 111164626 | - | 2.20  | 1420  | 100518248 | GPSM2   | 111100912 | 111165902 |
| NC_010455.5 | 31921078  | 31921414  | - | 2.20  | -3909 | 397403    | GPX1    | 31916269  | 31917337  |
| NC_010455.5 | 146043877 | 146044173 | - | -0.95 | 21    | 100513240 | GRAMD1C | 145997738 | 146044046 |
| NC_010454.4 | 5940876   | 5941255   | + | 2.20  | 342   | 100192436 | GRB2    | 5940723   | 6009095   |
| NC_010456.5 | 87227128  | 87227416  | - | 2.20  | -228  | 100153116 | GRID1   | 86539896  | 87227044  |
| NC_010443.5 | 68050505  | 68050793  | + | 2.20  | -2389 | 100516526 | GRIK2   | 68053038  | 68679088  |
| NC_010450.4 | 67608206  | 67608437  | - | 0.14  | -899  | 100516986 | GRSF1   | 67586935  | 67607422  |
| NC_010449.5 | 46657693  | 46657990  | - | 1.46  | -1350 | 100152951 | GSTA4   | 46635903  | 46656491  |
| NC_010449.5 | 46656361  | 46656696  | - | 2.88  | -37   | 100152951 | GSTA4   | 46635903  | 46656491  |
| NC_010443.5 | 112371554 | 112371878 | + | 3.27  | 424   | 100521701 | GTF2A2  | 112371292 | 112399541 |
| NC_010457.5 | 54445228  | 54445459  | + | -2.54 | 863   | 100513628 | GTF2E2  | 54444480  | 54525566  |
| NC_010444.4 | 40899049  | 40899337  | - | 2.78  | 1398  | 100525504 | GTF2H1  | 40857720  | 40900591  |
| NC_010445.4 | 19369028  | 19369260  | + | 0.46  | 747   | 100519247 | GTF3C1  | 19368397  | 19439640  |
| NC_010447.5 | 9323133   | 9323421   | - | 2.78  | -1085 | 100520611 | GTPBP1  | 9294329   | 9322192   |
| NC_010444.4 | 60355670  | 60355958  | - | 2.31  | -411  | 110259323 | GTPBP3  | 60352012  | 60355403  |
| NC_010450.4 | 35167208  | 35167866  | + | 2.31  | -78   | 100516681 | GUF1    | 35167615  | 35190450  |
| NC_010452.4 | 13941697  | 13941994  | + | 2.88  | 1907  | 396970    | H3F3A   | 13939938  | 13947976  |
| NC_010455.5 | 2841097   | 2841568   | - | -0.86 | -459  | 100518218 | HACL1   | 2786007   | 2840873   |
| NC_010455.5 | 2840459   | 2840747   | - | 1.88  | 270   | 100518218 | HACL1   | 2786007   | 2840873   |
| NC_010450.4 | 114004960 | 114005478 | - | 2.10  | 291   | 397604    | HADH    | 113952561 | 114005510 |
| NC_010444.4 | 60567792  | 60568080  | + | 1.88  | 361   | 100516543 | HAUS8   | 60567575  | 60593378  |
| NC_010444.4 | 142114928 | 142115471 | - | 3.05  | -7    | 397564    | HBEGF   | 142102455 | 142115192 |
| NC_010445.4 | 41479531  | 41479819  | - | 0.88  | 477   | 100738328 | HBQ1    | 41478282  | 41480152  |
| NC_010443.5 | 28969279  | 28969510  | + | -0.12 | 616   | 100158211 | HBS1L   | 28968778  | 29052425  |
| NC_010447.5 | 80409049  | 80409337  | - | 1.88  | 605   | 100514768 | HCFC2   | 80366826  | 80409798  |
| NC_010443.5 | 96724393  | 96724624  | - | -2.44 | 4986  | 100521177 | HDHD2   | 96682632  | 96729495  |
| NC_010456.5 | 103095283 | 103095571 | + | 3.46  | -265  | 100156944 | HECTD2  | 103095692 | 103182111 |
| NC_010456.5 | 105965783 | 105966229 | - | 1.98  | 997   | 100154547 | HELLS   | 105923727 | 105967003 |

|             |           |           |   |       |       |           |           |           |           |
|-------------|-----------|-----------|---|-------|-------|-----------|-----------|-----------|-----------|
| NC_010443.5 | 108207086 | 108207395 | + | 0.05  | 1055  | 100153537 | HERC1     | 108206185 | 108404149 |
| NC_010450.4 | 130666376 | 130666607 | - | 1.46  | -901  | 100626657 | HERC6     | 130594941 | 130665590 |
| NC_010455.5 | 131136041 | 131136272 | + | -1.71 | 186   | 100499567 | HES1      | 131135970 | 131137865 |
| NC_010444.4 | 83745709  | 83746046  | + | 2.20  | 614   | 396958    | HEXB      | 83745263  | 83784762  |
| NC_010450.4 | 83680390  | 83680621  | - | -1.35 | -2142 | 100525059 | HHIP      | 83583735  | 83678363  |
| NC_010455.5 | 151231294 | 151231734 | - | -0.68 | 3315  | 102166962 | HHLA2     | 151153982 | 151234829 |
| NC_010443.5 | 22239518  | 22239869  | + | 3.46  | -2891 | 100525369 | HIVEP2    | 22242585  | 22436940  |
| NC_010449.5 | 20998671  | 20998959  | + | -0.12 | -98   | 100157353 | HMGH4     | 20998913  | 21003138  |
| NC_010457.5 | 13768234  | 13768555  | - | 2.68  | -288  | 100624677 | HNMT      | 13733412  | 13768106  |
| NC_010447.5 | 19488502  | 19488824  | + | -1.12 | 3630  | 768103    | HNRNPA1   | 19485033  | 19489559  |
| NC_010447.5 | 19486015  | 19486357  | + | -2.12 | 1153  | 768103    | HNRNPA1   | 19485033  | 19489559  |
| NC_010460.4 | 46205331  | 46205646  | + | 0.88  | 324   | 100521762 | HNRNPA2B1 | 46205164  | 46215854  |
| NC_010460.4 | 46206234  | 46206718  | + | 1.78  | 1312  | 100521762 | HNRNPA2B1 | 46205164  | 46215854  |
| NC_010457.5 | 82960144  | 82960406  | + | -1.12 | 1946  | 100516520 | HNRNPA3   | 82958329  | 82968740  |
| NC_010456.5 | 71485099  | 71485332  | + | -1.44 | -1085 | 100155513 | HNRNPH3   | 71486301  | 71498356  |
| NC_010448.4 | 47654511  | 47654799  | - | 2.20  | 1201  | 102163392 | HNRNPL    | 47643561  | 47655856  |
| NC_010448.4 | 81238370  | 81238665  | - | -2.29 | 1305  | 100620404 | HNRNPR    | 81203079  | 81239823  |
| NC_010448.4 | 49279610  | 49280079  | + | 3.27  | -451  | 100622274 | HNRNPUL1  | 49280296  | 49315967  |
| NC_010444.4 | 9037283   | 9037514   | + | -2.54 | 2729  | 100620658 | HNRNPUL2  | 9034669   | 9048906   |
| NC_010444.4 | 9036643   | 9036992   | + | 2.27  | 2148  | 100620658 | HNRNPUL2  | 9034669   | 9048906   |
| NC_010444.4 | 88244975  | 88245479  | - | -3.65 | 778   | 100511070 | HOMER1    | 88116664  | 88246005  |
| NC_010448.4 | 109299025 | 109299348 | + | 3.46  | -3077 | 397224    | HRH4      | 109302264 | 109318019 |
| NC_010443.5 | 40179194  | 40179560  | - | 2.85  | 931   | 100154234 | HSF2      | 40147267  | 40180308  |
| NC_010447.5 | 80527518  | 80527806  | - | 1.88  | 3354  | 397191    | HSP90B1   | 80511513  | 80531016  |
| NC_010449.5 | 88606571  | 88607277  | + | 2.09  | -216  | 100621324 | HSPA2     | 88607140  | 88609947  |
| NC_010457.5 | 101375562 | 101375825 | + | 0.46  | 1674  | 397575    | HSPE1     | 101374019 | 101376146 |
| NC_010457.5 | 101374375 | 101374721 | + | 2.05  | 529   | 397575    | HSPE1     | 101374019 | 101376146 |
| NC_010453.5 | 7759943   | 7760327   | - | 1.05  | -700  | 100048931 | HSPH1     | 7733880   | 7759435   |
| NC_010461.5 | 94051997  | 94052523  | + | 2.88  | -1155 | 100524920 | HTR2C     | 94053415  | 94313352  |
| NC_010461.5 | 46443390  | 46443621  | - | 1.24  | -1678 | 100517442 | HUWE1     | 46281962  | 46441827  |
| NC_010448.4 | 14311441  | 14311672  | - | -1.86 | -3766 | 100513208 | HYDIN     | 13895276  | 14307790  |
| NC_010448.4 | 14305557  | 14305845  | - | 1.68  | 2089  | 100513208 | HYDIN     | 13895276  | 14307790  |
| NC_010445.4 | 42022125  | 42022368  | - | -1.08 | 340   | 100624746 | IARS      | 41945846  | 42022587  |
| NC_010452.4 | 31340377  | 31340996  | - | 2.46  | 94    | 100622692 | IDNK      | 31329716  | 31340781  |

|             |           |           |   |       |       |           |             |           |           |
|-------------|-----------|-----------|---|-------|-------|-----------|-------------|-----------|-----------|
| NC_010444.4 | 65912756  | 65913044  | - | 1.20  | -409  | 100525209 | IER2        | 65909638  | 65912491  |
| NC_010443.5 | 96760194  | 96760575  | - | 3.05  | 3490  | 100521060 | IER3IP1     | 96740718  | 96763875  |
| NC_010448.4 | 134648041 | 134648329 | - | 1.20  | 1672  | 100525523 | IFI44       | 134634679 | 134649857 |
| NC_010448.4 | 134678684 | 134679023 | - | 2.05  | 358   | 100511267 | IFI44L      | 134660230 | 134679212 |
| NC_010457.5 | 68983635  | 68984014  | - | -0.12 | 1320  | 100101927 | IFIH1       | 68930998  | 68985145  |
| NC_010456.5 | 101237408 | 101237675 | + | -1.71 | 138   | 100153038 | IFIT1       | 101237403 | 101249486 |
| NC_010455.5 | 196802094 | 196802437 | + | 3.05  | 290   | 100533555 | IFNAR2      | 196801975 | 196852640 |
| NC_010443.5 | 201278204 | 201278592 | - | 2.27  | -97   | 100153693 | IFN-DELTA-8 | 201277798 | 201278301 |
| NC_010443.5 | 201338489 | 201338720 | - | -1.93 | -3666 | 100156149 | IFN-OMEGA-4 | 201334366 | 201334938 |
| NC_010443.5 | 201313607 | 201313838 | - | 0.24  | 3838  | 100154075 | IFN-OMEGA-7 | 201316989 | 201317561 |
| NC_010443.5 | 201319420 | 201319651 | - | -1.12 | -1974 | 100154075 | IFN-OMEGA-7 | 201316989 | 201317561 |
| NC_010443.5 | 137692968 | 137693256 | - | 1.46  | -3263 | 397350    | IGF1R       | 137383623 | 137689849 |
| NC_010443.5 | 137692179 | 137692493 | - | 1.61  | -2487 | 397350    | IGF1R       | 137383623 | 137689849 |
| NC_010451.4 | 92275193  | 92275636  | - | 1.73  | -3150 | 100621977 | IGF2BP3     | 92104786  | 92272264  |
| NC_010455.5 | 91682273  | 91682504  | - | -2.35 | -2894 | 100524956 | IGSF10      | 91625421  | 91679494  |
| NC_010455.5 | 91676160  | 91676448  | - | 1.14  | 3190  | 100524956 | IGSF10      | 91625421  | 91679494  |
| NC_010455.5 | 141145455 | 141145796 | + | 0.88  | -2863 | 100511781 | IGSF11      | 141148489 | 141289504 |
| NC_010451.4 | 136375064 | 136375352 | + | 1.78  | -149  | 100515333 | IKZF1       | 136375357 | 136464942 |
| NC_010457.5 | 115658028 | 115658454 | - | 1.95  | -2728 | 100737978 | IKZF2       | 115512160 | 115655513 |
| NC_010450.4 | 101535784 | 101536015 | + | -0.54 | 3157  | 403123    | IL21        | 101532742 | 101540712 |
| NC_010458.4 | 35150708  | 35150939  | - | -1.67 | 1008  | 100037294 | IL6ST       | 35101306  | 35151832  |
| NC_010457.5 | 137764775 | 137765063 | - | 2.46  | 839   | 100518585 | ILKAP       | 137740291 | 137765758 |
| NC_010457.5 | 31974949  | 31975237  | - | 1.78  | 65    | 100621511 | IMP4        | 31970179  | 31975158  |
| NC_010456.5 | 114226478 | 114227016 | + | 2.46  | -1251 | 100153400 | INA         | 114227998 | 114240566 |
| NC_010443.5 | 130989915 | 130990338 | - | 2.14  | 2465  | 106506757 | INAFM2      | 130989737 | 130992592 |
| NC_010444.4 | 9445935   | 9446166   | - | 0.46  | -225  | 100516847 | INCENP      | 9411942   | 9445825   |
| NC_010457.5 | 30999303  | 30999610  | - | 1.05  | 4948  | 397490    | INHBB       | 30999994  | 31004405  |
| NC_010443.5 | 253396890 | 253397121 | - | -1.12 | -3119 | 100513906 | INIP        | 253375193 | 253393886 |
| NC_010457.5 | 94963740  | 94964028  | + | 3.05  | -1359 | 100514878 | INPP1       | 94965243  | 94987286  |
| NC_010453.5 | 16374336  | 16374726  | + | -0.12 | -745  | 100156695 | INTS6       | 16375276  | 16468246  |
| NC_010450.4 | 97204164  | 97204732  | - | 2.39  | 211   | 100518740 | INTU        | 97123062  | 97204659  |
| NC_010443.5 | 241902435 | 241902666 | + | -1.93 | 4825  | 100155489 | INVS        | 241897725 | 242058121 |
| NC_010453.5 | 67019971  | 67020371  | + | -2.71 | 872   | 100152933 | IPO5        | 67019299  | 67059375  |
| NC_010455.5 | 71238469  | 71238757  | + | 2.68  | 4096  | 100622196 | IQSEC1      | 71234517  | 71366017  |

|             |           |           |   |       |       |           |          |           |           |
|-------------|-----------|-----------|---|-------|-------|-----------|----------|-----------|-----------|
| NC_010449.5 | 47527972  | 47528263  | - | 0.20  | 1081  | 100153993 | IREB2    | 47481539  | 47529199  |
| NC_010449.5 | 47528602  | 47528971  | - | 2.46  | 412   | 100153993 | IREB2    | 47481539  | 47529199  |
| NC_010449.5 | 115352912 | 115353143 | + | -0.12 | -3591 | 100153902 | ISG12(A) | 115356619 | 115361537 |
| NC_010459.5 | 21947515  | 21947803  | + | 2.78  | -692  | 100154170 | ISM1     | 21948351  | 22037023  |
| NC_010457.5 | 91607106  | 91607449  | + | -2.27 | 2600  | 397285    | ITGAV    | 91604677  | 91711843  |
| NC_010457.5 | 91603989  | 91604277  | + | 1.46  | -544  | 397285    | ITGAV    | 91604677  | 91711843  |
| NC_010453.5 | 19374947  | 19375322  | - | 3.27  | 2796  | 595120    | ITM2B    | 19349088  | 19377931  |
| NC_010459.5 | 32474652  | 32475176  | - | 0.88  | -87   | 100157088 | ITPA     | 32458351  | 32474827  |
| NC_010449.5 | 114518684 | 114518972 | - | 1.78  | 1977  | 100152339 | ITPK1    | 114361976 | 114520805 |
| NC_010451.4 | 126484852 | 126485109 | - | -2.12 | -4854 | 100302027 | IVNS1ABP | 126459542 | 126480126 |
| NC_010448.4 | 147430046 | 147430596 | + | 1.82  | 1309  | 397202    | JAK1     | 147429012 | 147567188 |
| NC_010456.5 | 66729583  | 66729814  | - | -1.35 | -16   | 100157328 | JMJD1C   | 66640845  | 66729682  |
| NC_010446.5 | 61630097  | 61630421  | + | 1.53  | 1955  | 100155368 | JPH1     | 61628304  | 61716550  |
| NC_010446.5 | 61626742  | 61627030  | + | 0.98  | -1418 | 100155368 | JPH1     | 61628304  | 61716550  |
| NC_010446.5 | 95713827  | 95714144  | + | 1.46  | 291   | 100145894 | JTB      | 95713694  | 95716154  |
| NC_010454.4 | 16936670  | 16937120  | + | 1.46  | 1890  | 100517913 | KANSL1   | 16935005  | 17096906  |
| NC_010455.5 | 6986662   | 6987153   | + | 1.68  | 1756  | 100626923 | KAT2B    | 6985151   | 7099771   |
| NC_010455.5 | 6984268   | 6984499   | + | -0.86 | -767  | 100626923 | KAT2B    | 6985151   | 7099771   |
| NC_010444.4 | 6571500   | 6571788   | - | 2.78  | 817   | 100511913 | KAT5     | 6560544   | 6572461   |
| NC_010443.5 | 16330681  | 16331093  | + | 3.05  | 33    | 100518101 | KATNA1   | 16330854  | 16360801  |
| NC_010444.4 | 15036013  | 15036728  | + | 2.31  | -348  | 100511244 | KBTBD4   | 15036719  | 15043825  |
| NC_010460.4 | 26619947  | 26620178  | - | -0.12 | 4147  | 100512382 | KCND2    | 26139457  | 26624210  |
| NC_010449.5 | 34654930  | 34655218  | - | 1.88  | 1631  | 100154866 | KCNK5    | 34617948  | 34656705  |
| NC_010444.4 | 59817789  | 59818098  | - | 3.46  | -3128 | 100519132 | KCNN1    | 59780010  | 59814815  |
| NC_010444.4 | 118441547 | 118441778 | + | -3.12 | 2334  | 100519705 | KCNN2    | 118439328 | 118882299 |
| NC_010445.4 | 18141227  | 18141570  | - | 3.46  | 190   | 100623749 | KCTD13   | 18124628  | 18141589  |
| NC_010455.5 | 40211065  | 40211353  | + | 1.46  | 434   | 100516225 | KCTD6    | 40210775  | 40220091  |
| NC_010448.4 | 84263550  | 84263859  | - | 2.78  | 1231  | 100511202 | KDF1     | 84254493  | 84264936  |
| NC_010444.4 | 5255033   | 5255264   | - | -0.18 | 3438  | 100294703 | KDM2A    | 5238690   | 5258587   |
| NC_010448.4 | 167642371 | 167642707 | - | 2.46  | -158  | 100621904 | KDM4A    | 167597954 | 167642381 |
| NC_010452.4 | 24831164  | 24831454  | - | 4.05  | 228   | 102163404 | KDM5B    | 24739115  | 24831537  |
| NC_010444.4 | 72658218  | 72658673  | + | -2.00 | 1494  | 100516780 | KHSRP    | 72656951  | 72668721  |
| NC_010448.4 | 3786085   | 3786373   | - | 2.05  | 55    | 100515140 | KIAA0513 | 3726752   | 3786284   |
| NC_010450.4 | 101936510 | 101937192 | - | 1.63  | 301   | 100521104 | KIAA1109 | 101737084 | 101937152 |

|                |           |           |   |       |       |           |          |           |           |
|----------------|-----------|-----------|---|-------|-------|-----------|----------|-----------|-----------|
| NC_010447.5    | 42297781  | 42298069  | - | 2.05  | 1670  | 100511327 | KIAA1551 | 42263569  | 42299595  |
| NC_010447.5    | 42298658  | 42298960  | - | 2.68  | 786   | 100511327 | KIAA1551 | 42263569  | 42299595  |
| NC_010443.5    | 216114645 | 216114934 | + | -1.93 | 1867  | 100520352 | KIAA2026 | 216112922 | 216226158 |
| NC_010456.5    | 13098717  | 13099056  | - | 2.63  | 1556  | 100155514 | KIF13B   | 12913615  | 13100443  |
| NC_010452.4    | 42693040  | 42693328  | - | 2.20  | 367   | 595132    | KIF5B    | 42637105  | 42693551  |
| NC_010446.5    | 331866    | 332154    | - | 0.46  | 32    | 100514226 | KIFC2    | 324623    | 332042    |
| NC_010443.5    | 143538124 | 143538355 | - | -1.71 | 1993  | 494563    | KLF13    | 143499136 | 143540233 |
| NC_010457.5    | 110378648 | 110378936 | - | 0.46  | 578   | 100038003 | KLF7     | 110282404 | 110379370 |
| NC_010460.4    | 18723511  | 18723758  | - | -0.12 | -544  | 100739403 | KLHDC10  | 18667377  | 18723090  |
| NC_010452.4    | 24900976  | 24901355  | - | -1.86 | 1815  | 100526239 | KLHL12   | 24869819  | 24902981  |
| NC_010448.4    | 116612905 | 116613193 | - | 1.46  | 270   | 100518133 | KLHL14   | 116510854 | 116613319 |
| NC_010461.5    | 20128699  | 20128987  | - | 2.78  | 747   | 100525794 | KLHL15   | 20088208  | 20129590  |
| NC_010450.4    | 43870202  | 43870490  | - | 3.46  | 665   | 100511391 | KLHL2    | 43749423  | 43871011  |
| NC_010457.5    | 76029886  | 76030174  | + | 1.78  | 574   | 100520221 | KLHL23   | 76029456  | 76051670  |
| NC_010449.5    | 88292328  | 88293081  | - | 1.56  | -746  | 100621005 | KLHL25   | 88249009  | 88291958  |
| NC_010449.5    | 88291740  | 88292098  | - | 3.05  | 39    | 100621005 | KLHL25   | 88249009  | 88291958  |
| NC_010444.4    | 59193359  | 59193647  | - | 2.78  | 445   | 100523486 | KLHL26   | 59166118  | 59193948  |
| NC_010457.5    | 75872625  | 75872996  | + | 2.46  | -2883 | 100627572 | KLHL41   | 75875694  | 75893789  |
| NC_010447.5    | 62044183  | 62044622  | - | 3.20  | 453   | 100144592 | KLRF1    | 62032559  | 62044856  |
| NC_010448.4    | 59515219  | 59515507  | + | 0.46  | -1695 | 110261054 | KMT5C    | 59517058  | 59524551  |
| NC_010453.5    | 17949392  | 17949623  | + | -1.93 | 886   | 396715    | KPNA3    | 17948621  | 18033818  |
| NC_010453.5    | 17949017  | 17949381  | + | 2.46  | 578   | 396715    | KPNA3    | 17948621  | 18033818  |
| NC_010448.4    | 88610879  | 88611202  | + | -0.22 | -87   | 100621713 | KPNA6    | 88611128  | 88656281  |
| NC_010448.4    | 88612037  | 88612384  | + | 1.46  | 1082  | 100621713 | KPNA6    | 88611128  | 88656281  |
| NC_010445.4    | 57927822  | 57928110  | + | 2.05  | -302  | 100515537 | KRCC1    | 57928268  | 57946294  |
| NC_010446.5    | 93975655  | 93975886  | - | -0.54 | -209  | 100156749 | LAMTOR2  | 93972112  | 93975561  |
| NC_010445.4    | 118153682 | 118153997 | + | 0.46  | 1973  | 100516188 | LAPTM4A  | 118151866 | 118170279 |
| NC_010452.4    | 68657670  | 68657930  | + | -2.71 | -1648 | 100522458 | LARP4B   | 68659448  | 68707893  |
| NC_010450.4    | 110089299 | 110089707 | - | 1.73  | 286   | 100511273 | LARP7    | 110069565 | 110089789 |
| NC_010450.4    | 110088942 | 110089239 | - | 0.05  | 698   | 100511273 | LARP7    | 110069565 | 110089789 |
| NC_010455.5    | 28524537  | 28524825  | + | 1.46  | -97   | 100513625 | LARS2    | 28524778  | 28692327  |
| NW_018084833.1 | 1042156   | 1042812   | + | 4.08  | -1506 | 100303611 | LCN6     | 1043990   | 1048569   |
| NC_010444.4    | 25140474  | 25141022  | - | 4.05  | -2115 | 100511916 | LDLRAD3  | 24875379  | 25138633  |
| NC_010461.5    | 115582255 | 115582545 | + | -0.71 | 1778  | 100525445 | LDOC1    | 115580622 | 115583129 |



|                |           |           |   |       |       |           |              |           |           |
|----------------|-----------|-----------|---|-------|-------|-----------|--------------|-----------|-----------|
| NC_010447.5    | 29597630  | 29597918  | + | 0.88  | 1440  | 100511508 | LEMD3        | 29596334  | 29672704  |
| NC_010457.5    | 54929455  | 54929743  | - | 2.46  | 259   | 100622960 | LEPROTL1     | 54916037  | 54929858  |
| NC_010450.4    | 927492    | 927780    | - | 0.88  | -1136 | 100514302 | LETM1        | 898178    | 926500    |
| NW_018085018.1 | 328983    | 329271    | - | 3.05  | -3966 | 110258454 | LETMD1       | 313657    | 325161    |
| NC_010449.5    | 114210185 | 114210563 | - | 1.88  | -278  | 100154477 | LGMN         | 114176217 | 114210096 |
| NC_010457.5    | 59682373  | 59682604  | + | -1.67 | -2415 | 100517009 | LIMS2        | 59684904  | 59709380  |
| NC_010450.4    | 135330929 | 135331374 | + | 1.46  | -732  | 100511027 | LIN54        | 135331884 | 135398274 |
| NC_010447.5    | 15135337  | 15135625  | - | 2.46  | 2144  | 100525991 | LMBR1L       | 15121550  | 15137625  |
| NC_010444.4    | 129809215 | 129809490 | + | -1.71 | 2124  | 100513342 | LMNB1        | 129807228 | 129862211 |
| NC_010444.4    | 76120956  | 76121244  | + | 2.46  | -4832 | 100620983 | LMNB2        | 76125932  | 76146564  |
| NC_010444.4    | 27042820  | 27043108  | + | 3.63  | -1672 | 100512825 | LMO2         | 27044636  | 27055457  |
| NC_010453.5    | 48030480  | 48030730  | + | -0.76 | 603   | 100523918 | LMO7         | 48030002  | 48133449  |
| NC_010444.4    | 103569935 | 103570166 | + | -0.86 | 1684  | 100125826 | LNPEP        | 103568366 | 103659589 |
| NC_010446.5    | 91518795  | 91519185  | + | 0.61  | 1600  | 100152848 | LOC100152848 | 91517390  | 91523759  |
| NC_010449.5    | 23598761  | 23598992  | + | -2.27 | -409  | 100153163 | LOC100153163 | 23599286  | 23610431  |
| NC_010443.5    | 246105458 | 246105910 | + | 1.27  | 596   | 100154081 | LOC100154081 | 246105088 | 246117913 |
| NC_010443.5    | 221578679 | 221578967 | + | 4.05  | 1138  | 100155087 | LOC100155087 | 221577685 | 221580452 |
| NC_010443.5    | 246083226 | 246083457 | + | -1.86 | -2887 | 100155308 | LOC100155308 | 246086229 | 246088291 |
| NC_010455.5    | 120808694 | 120808982 | + | 0.46  | 4807  | 100155468 | LOC100155468 | 120804031 | 120807604 |
| NW_018084989.1 | 180936    | 181285    | - | -1.44 | 656   | 100155553 | LOC100155553 | 177244    | 181767    |
| NC_010461.5    | 26309522  | 26309810  | - | 2.05  | -652  | 100156010 | LOC100156010 | 26308517  | 26309014  |
| NC_010446.5    | 89736499  | 89737037  | + | 2.27  | -785  | 100156074 | LOC100156074 | 89737553  | 89751165  |
| NC_010449.5    | 58624110  | 58624524  | + | -2.73 | 1348  | 100156967 | LOC100156967 | 58622969  | 58644024  |
| NC_010449.5    | 58623666  | 58623954  | + | 1.05  | 841   | 100156967 | LOC100156967 | 58622969  | 58644024  |
| NC_010447.5    | 28235914  | 28236202  | + | 3.20  | 4934  | 100156985 | LOC100156985 | 28231124  | 28231457  |
| NC_010448.4    | 128007348 | 128007610 | + | -0.95 | 1918  | 100157017 | LOC100157017 | 128005561 | 128027959 |
| NW_018085257.1 | 904758    | 904989    | - | -1.12 | -2540 | 100157267 | LOC100157267 | 901358    | 902333    |
| NC_010448.4    | 135054382 | 135054613 | + | -0.44 | -2484 | 100511460 | LOC100511460 | 135056982 | 135114669 |
| NC_010448.4    | 165270274 | 165270505 | + | -2.44 | 2129  | 100511937 | LOC100511937 | 165268260 | 165402668 |
| NC_010448.4    | 46226628  | 46226916  | - | 2.78  | 2293  | 100512052 | LOC100512052 | 46171184  | 46229065  |
| NC_010457.5    | 17573773  | 17574061  | + | 1.88  | -2935 | 100512195 | LOC100512195 | 17576852  | 17578161  |
| NW_018085237.1 | 409611    | 409842    | - | -2.44 | -1535 | 100512945 | LOC100512945 | 407283    | 408191    |
| NW_018085237.1 | 403466    | 403697    | - | -1.35 | 4609  | 100512945 | LOC100512945 | 407283    | 408191    |
| NW_018084833.1 | 979942    | 980230    | - | 2.46  | -2477 | 100513261 | LOC100513261 | 965798    | 977609    |

|                |           |           |   |       |       |           |              |           |           |
|----------------|-----------|-----------|---|-------|-------|-----------|--------------|-----------|-----------|
| NC_010444.4    | 56301740  | 56302025  | + | -2.12 | 79    | 100513523 | LOC100513523 | 56301803  | 56302714  |
| NC_010449.5    | 79252144  | 79252375  | + | -2.35 | 3798  | 100513553 | LOC100513553 | 79248461  | 79249496  |
| NC_010450.4    | 65877957  | 65878188  | - | -0.44 | -3584 | 100513671 | LOC100513671 | 65861596  | 65874488  |
| NC_010451.4    | 51034279  | 51034567  | - | 0.46  | 1450  | 100513751 | LOC100513751 | 51032594  | 51035873  |
| NC_010445.4    | 68626193  | 68626481  | + | 2.20  | 2226  | 100513982 | LOC100513982 | 68624111  | 68630954  |
| NW_018085316.1 | 44517     | 45793     | - | -0.90 | 4256  | 100514433 | LOC100514433 | 42555     | 49411     |
| NW_018085316.1 | 46312     | 46861     | - | -0.81 | 2824  | 100514433 | LOC100514433 | 42555     | 49411     |
| NW_018085316.1 | 48684     | 49151     | - | -1.03 | 493   | 100514433 | LOC100514433 | 42555     | 49411     |
| NC_010448.4    | 62455693  | 62455981  | - | 1.78  | 720   | 100514469 | LOC100514469 | 62440232  | 62456557  |
| NC_010456.5    | 141613784 | 141614106 | - | 2.88  | 3592  | 100514734 | LOC100514734 | 141616446 | 141617537 |
| NC_010444.4    | 53454409  | 53454754  | - | 2.20  | 3251  | 100514828 | LOC100514828 | 53456901  | 53457833  |
| NC_010451.4    | 51231985  | 51232231  | + | -2.12 | 993   | 100515044 | LOC100515044 | 51231115  | 51232047  |
| NW_018085302.1 | 52609     | 52897     | - | 0.88  | 710   | 100515430 | LOC100515430 | 16214     | 53463     |
| NC_010451.4    | 50874142  | 50874373  | - | -0.35 | -4174 | 100515746 | LOC100515746 | 50869088  | 50870083  |
| NC_010444.4    | 142952423 | 142953052 | + | 3.46  | 62    | 100515772 | LOC100515772 | 142952675 | 142970336 |
| NC_010451.4    | 5585787   | 5586075   | - | 1.46  | 3895  | 100516094 | LOC100516094 | 5588354   | 5589826   |
| NC_010444.4    | 131021001 | 131021232 | - | -0.35 | -4575 | 100516424 | LOC100516424 | 130971706 | 131016541 |
| NC_010461.5    | 61962643  | 61962980  | + | 0.05  | 428   | 100516480 | LOC100516480 | 61962383  | 61969011  |
| NC_010461.5    | 61962412  | 61962643  | + | -1.71 | 144   | 100516480 | LOC100516480 | 61962383  | 61969011  |
| NC_010461.5    | 110623248 | 110623536 | + | -0.12 | 1266  | 100516891 | LOC100516891 | 110622126 | 110660592 |
| NC_010451.4    | 5827555   | 5827843   | - | 1.78  | -1422 | 100517357 | LOC100517357 | 5825333   | 5826277   |
| NW_018085302.1 | 466413    | 466701    | - | 2.46  | -2203 | 100517394 | LOC100517394 | 463428    | 464354    |
| NC_010455.5    | 147507786 | 147508017 | - | -2.44 | 880   | 100517427 | LOC100517427 | 147485965 | 147508782 |
| NC_010458.4    | 47796480  | 47796771  | - | 3.46  | 786   | 100517502 | LOC100517502 | 47792699  | 47797412  |
| NC_010454.4    | 55424979  | 55425210  | - | -0.35 | -974  | 100517855 | LOC100517855 | 55406730  | 55424120  |
| NW_018084852.1 | 94219     | 94758     | - | 4.20  | 1916  | 100518616 | LOC100518616 | 95130     | 96405     |
| NC_010444.4    | 54251316  | 54251548  | + | 0.14  | 4741  | 100518655 | LOC100518655 | 54246691  | 54247623  |
| NW_018085302.1 | 69944     | 70249     | - | -1.86 | 4313  | 100518829 | LOC100518829 | 73475     | 74410     |
| NW_018085302.1 | 86183     | 86414     | - | -2.12 | 1958  | 100519014 | LOC100519014 | 87346     | 88257     |
| NC_010444.4    | 64116562  | 64116793  | - | -1.71 | 4912  | 100519297 | LOC100519297 | 64119072  | 64121590  |
| NC_010444.4    | 64126295  | 64126583  | - | 1.88  | -4849 | 100519297 | LOC100519297 | 64119072  | 64121590  |
| NC_010444.4    | 12995769  | 12996089  | - | -0.86 | -2183 | 100519351 | LOC100519351 | 12992794  | 12993746  |
| NC_010443.5    | 236707979 | 236708267 | - | 3.46  | 3977  | 100519461 | LOC100519461 | 236709468 | 236712100 |
| NC_010451.4    | 51499608  | 51499839  | - | -1.44 | 4300  | 100519506 | LOC100519506 | 51503098  | 51504024  |

|                |           |           |   |       |       |           |              |           |           |
|----------------|-----------|-----------|---|-------|-------|-----------|--------------|-----------|-----------|
| NC_010444.4    | 10142332  | 10142622  | + | 0.61  | -193  | 100519643 | LOC100519643 | 10142670  | 10158110  |
| NW_018085302.1 | 187955    | 188186    | - | -1.54 | -572  | 100520237 | LOC100520237 | 186005    | 187498    |
| NC_010454.4    | 50156078  | 50156440  | + | -0.12 | 774   | 100520452 | LOC100520452 | 50155485  | 50171525  |
| NW_018085302.1 | 169045    | 169276    | + | -1.71 | -1392 | 100520607 | LOC100520607 | 170553    | 171917    |
| NC_010451.4    | 5114757   | 5114988   | + | -1.86 | 4552  | 100521140 | LOC100521140 | 5110320   | 5116455   |
| NC_010460.4    | 46047335  | 46047704  | - | 2.46  | -3751 | 100521594 | LOC100521594 | 45989918  | 46043768  |
| NC_010444.4    | 55274944  | 55275232  | - | 2.20  | 3685  | 100521607 | LOC100521607 | 55277835  | 55278773  |
| NW_018085208.1 | 29616     | 29904     | + | 0.46  | 1929  | 100521715 | LOC100521715 | 27831     | 28763     |
| NC_010451.4    | 35184779  | 35185067  | - | 1.61  | 868   | 100522887 | LOC100522887 | 35167567  | 35185791  |
| NC_010447.5    | 17642891  | 17643179  | - | 1.88  | -317  | 100523670 | LOC100523670 | 17635567  | 17642718  |
| NC_010451.4    | 51628272  | 51628560  | - | 1.68  | -2394 | 100523744 | LOC100523744 | 51624333  | 51626022  |
| NC_010451.4    | 51623507  | 51623795  | - | 0.46  | 2371  | 100523744 | LOC100523744 | 51624333  | 51626022  |
| NC_010453.5    | 3305067   | 3305399   | + | 3.05  | 2339  | 100523747 | LOC100523747 | 3302894   | 3793872   |
| NC_010449.5    | 80046783  | 80047071  | - | 2.27  | -4778 | 100524030 | LOC100524030 | 80041087  | 80042149  |
| NC_010447.5    | 20112905  | 20113241  | + | 1.78  | 441   | 100524142 | LOC100524142 | 20112632  | 20113698  |
| NC_010451.4    | 4107692   | 4107983   | - | -2.22 | 3130  | 100524159 | LOC100524159 | 4109979   | 4110968   |
| NC_010447.5    | 6146501   | 6146901   | + | 1.88  | 471   | 100524254 | LOC100524254 | 6146230   | 6170209   |
| NC_010444.4    | 135187073 | 135187418 | + | 3.46  | 879   | 100524308 | LOC100524308 | 135186366 | 135188237 |
| NC_010452.4    | 44957650  | 44958205  | - | 3.34  | 96    | 100524391 | LOC100524391 | 44885486  | 44958024  |
| NC_010445.4    | 24227830  | 24228304  | - | 0.05  | 764   | 100524613 | LOC100524613 | 24197743  | 24228831  |
| NC_010444.4    | 124719450 | 124719681 | + | 0.65  | 1041  | 100524732 | LOC100524732 | 124718524 | 124733892 |
| NC_010448.4    | 107278634 | 107279138 | - | 2.78  | 3761  | 100525229 | LOC100525229 | 107277789 | 107282647 |
| NC_010449.5    | 93881952  | 93882267  | - | 3.20  | 485   | 100525232 | LOC100525232 | 93861138  | 93882595  |
| NC_010444.4    | 61664561  | 61664849  | - | 1.20  | 1123  | 100525329 | LOC100525329 | 61647461  | 61665828  |
| NW_018084993.1 | 224042    | 224330    | + | 1.88  | 3845  | 100526175 | LOC100526175 | 220341    | 221780    |
| NW_018085076.1 | 5963      | 6251      | + | 2.46  | -2923 | 100620277 | LOC100620277 | 9030      | 12375     |
| NC_010454.4    | 32120262  | 32120664  | + | 3.05  | -880  | 100621260 | LOC100621260 | 32121343  | 32156021  |
| NC_010455.5    | 199602027 | 199602258 | + | -0.86 | 1374  | 100622246 | LOC100622246 | 199600768 | 199606618 |
| NC_010451.4    | 92953371  | 92953659  | + | 2.20  | 964   | 100623190 | LOC100623190 | 92952551  | 92990833  |
| NC_010444.4    | 54335415  | 54335646  | + | -1.71 | -3479 | 100623502 | LOC100623502 | 54339010  | 54340093  |
| NC_010444.4    | 142899099 | 142899387 | + | 0.56  | -1316 | 100624174 | LOC100624174 | 142900559 | 142907853 |
| NC_010444.4    | 142903044 | 142903332 | + | 3.46  | 2629  | 100624174 | LOC100624174 | 142900559 | 142907853 |
| NC_010450.4    | 66745131  | 66745419  | - | 2.46  | 3486  | 100624541 | LOC100624541 | 66727047  | 66748761  |
| NC_010444.4    | 55812167  | 55812398  | - | -2.57 | -1310 | 100624683 | LOC100624683 | 55810043  | 55810972  |

|                |           |           |   |       |       |           |              |           |           |
|----------------|-----------|-----------|---|-------|-------|-----------|--------------|-----------|-----------|
| NC_010450.4    | 66641328  | 66641658  | - | 1.78  | -856  | 100624700 | LOC100624700 | 66602127  | 66640637  |
| NC_010450.4    | 86258745  | 86259033  | + | 3.46  | 3861  | 100624892 | LOC100624892 | 86255028  | 86256907  |
| NC_010453.5    | 15631991  | 15632279  | - | 1.88  | -3480 | 100625564 | LOC100625564 | 15550458  | 15628655  |
| NC_010451.4    | 5435063   | 5435303   | + | -2.03 | 4085  | 100625684 | LOC100625684 | 5431098   | 5434483   |
| NC_010447.5    | 57777755  | 57778060  | - | 0.32  | -234  | 100625850 | LOC100625850 | 57777008  | 57777673  |
| NC_010451.4    | 51174681  | 51174969  | + | 2.78  | 988   | 100625852 | LOC100625852 | 51173837  | 51174796  |
| NC_010457.5    | 16092934  | 16093462  | + | 0.73  | -1079 | 100625897 | LOC100625897 | 16094277  | 16154467  |
| NC_010451.4    | 36619691  | 36619929  | - | -0.54 | 705   | 100627195 | LOC100627195 | 36554800  | 36620515  |
| NC_010444.4    | 62629128  | 62629450  | - | 2.78  | 2940  | 100736663 | LOC100736663 | 62630428  | 62632229  |
| NC_010451.4    | 4701467   | 4702370   | - | 1.49  | 4533  | 100737110 | LOC100737110 | 4705204   | 4706452   |
| NC_010450.4    | 16900506  | 16900737  | + | -1.35 | 3346  | 100737183 | LOC100737183 | 16897275  | 17012886  |
| NC_010444.4    | 56767013  | 56767301  | + | 2.05  | -816  | 100737570 | LOC100737570 | 56767973  | 56768920  |
| NC_010448.4    | 50773008  | 50773293  | + | -3.29 | 265   | 100737582 | LOC100737582 | 50772885  | 50807359  |
| NC_010444.4    | 8626918   | 8627338   | - | 1.46  | 1484  | 100737764 | LOC100737764 | 8609119   | 8628612   |
| NC_010444.4    | 28497235  | 28497523  | + | 3.46  | 365   | 100737821 | LOC100737821 | 28497014  | 28818396  |
| NC_010444.4    | 28497859  | 28498147  | + | 0.61  | 989   | 100737821 | LOC100737821 | 28497014  | 28818396  |
| NC_010455.5    | 27935677  | 27935965  | + | 2.27  | -1762 | 100738134 | LOC100738134 | 27937583  | 27946237  |
| NC_010457.5    | 83295668  | 83296109  | - | 1.20  | -37   | 100738403 | LOC100738403 | 83292977  | 83295851  |
| NC_010451.4    | 121511845 | 121512199 | - | -1.71 | 757   | 100738642 | LOC100738642 | 121499756 | 121512779 |
| NC_010443.5    | 246066598 | 246067074 | + | 3.05  | 4789  | 100739563 | LOC100739563 | 246062047 | 246063289 |
| NC_010460.4    | 10333249  | 10333650  | - | 2.68  | -259  | 102162486 | LOC102162486 | 10268077  | 10333190  |
| NC_010450.4    | 77971122  | 77971698  | - | 1.42  | -1129 | 102163742 | LOC102163742 | 77969154  | 77970281  |
| NC_010453.5    | 6762892   | 6763193   | + | 3.05  | -101  | 102165571 | LOC102165571 | 6763144   | 6766736   |
| NC_010453.5    | 6761478   | 6761814   | + | 0.14  | -1498 | 102165571 | LOC102165571 | 6763144   | 6766736   |
| NC_010451.4    | 57016322  | 57016651  | + | 1.36  | -294  | 102165987 | LOC102165987 | 57016781  | 57020248  |
| NC_010452.4    | 43018963  | 43019251  | + | 2.88  | 260   | 102166590 | LOC102166590 | 43018847  | 43083304  |
| NC_010448.4    | 50842898  | 50843186  | + | 2.05  | -2875 | 102167273 | LOC102167273 | 50845917  | 50851537  |
| NC_010449.5    | 48872664  | 48872952  | - | 1.88  | 676   | 102167410 | LOC102167410 | 48741698  | 48873484  |
| NC_010448.4    | 170637159 | 170637484 | - | -2.12 | 173   | 102167697 | LOC102167697 | 170619406 | 170637495 |
| NC_010451.4    | 104912841 | 104913132 | - | 1.68  | -181  | 106504991 | LOC106504991 | 104883513 | 104912805 |
| NW_018085302.1 | 96282     | 96585     | - | -1.73 | 1897  | 106507272 | LOC106507272 | 97394     | 98331     |
| NC_010447.5    | 61505109  | 61505518  | + | 1.46  | 1382  | 106507517 | LOC106507517 | 61503931  | 61526167  |
| NC_010445.4    | 6528561   | 6528849   | + | 1.88  | 2711  | 106508762 | LOC106508762 | 6525994   | 6539895   |
| NC_010444.4    | 141972397 | 141972696 | + | 2.20  | 1504  | 106509580 | LOC106509580 | 141971042 | 141972967 |

|                |           |           |   |       |       |           |              |           |           |
|----------------|-----------|-----------|---|-------|-------|-----------|--------------|-----------|-----------|
| NC_010446.5    | 72781828  | 72782298  | - | 2.14  | 2071  | 106510078 | LOC106510078 | 72775536  | 72784134  |
| NC_010448.4    | 45743897  | 45744218  | + | 0.88  | 215   | 106510528 | LOC106510528 | 45743842  | 45763441  |
| NC_010448.4    | 61217803  | 61218260  | - | 1.46  | -1917 | 110255329 | LOC110255329 | 61202808  | 61216114  |
| NC_010451.4    | 120809780 | 120810086 | - | 2.05  | 682   | 110255567 | LOC110255567 | 120809470 | 120810615 |
| NC_010452.4    | 2865743   | 2865982   | - | -2.12 | 1130  | 110255734 | LOC110255734 | 2856170   | 2866993   |
| NC_010454.4    | 10363009  | 10363345  | + | 2.05  | 823   | 110255979 | LOC110255979 | 10362354  | 10364669  |
| NC_010454.4    | 49576700  | 49576988  | - | 2.14  | -4056 | 110256093 | LOC110256093 | 49568837  | 49572788  |
| NC_010455.5    | 117180470 | 117180758 | + | 2.05  | 1277  | 110256340 | LOC110256340 | 117179337 | 117237380 |
| NC_010455.5    | 117179836 | 117180067 | + | -0.76 | 614   | 110256340 | LOC110256340 | 117179337 | 117237380 |
| NC_010455.5    | 117180123 | 117180411 | + | 2.05  | 930   | 110256340 | LOC110256340 | 117179337 | 117237380 |
| NC_010443.5    | 2829271   | 2829561   | + | 2.46  | 2550  | 110256592 | LOC110256592 | 2826866   | 3040744   |
| NC_010456.5    | 74297390  | 74297743  | - | 1.78  | -2478 | 110256823 | LOC110256823 | 74294341  | 74295088  |
| NC_010443.5    | 92947892  | 92948124  | - | -1.93 | 4045  | 110256969 | LOC110256969 | 92951121  | 92952053  |
| NC_010457.5    | 81937641  | 81937929  | - | 1.78  | 3598  | 110257186 | LOC110257186 | 81935837  | 81941383  |
| NC_010460.4    | 6633981   | 6634239   | + | 0.46  | 1128  | 110257570 | LOC110257570 | 6632982   | 6719077   |
| NW_018085022.1 | 62274     | 62562     | - | 1.46  | -4151 | 110258461 | LOC110258461 | 57374     | 58267     |
| NW_018085205.1 | 242922    | 243210    | + | 3.05  | -1964 | 110258782 | LOC110258782 | 245030    | 245962    |
| NW_018085257.1 | 1383625   | 1383913   | - | 1.88  | 2786  | 110258967 | LOC110258967 | 1385312   | 1386555   |
| NW_018085257.1 | 641342    | 641771    | - | 1.85  | 4707  | 110258976 | LOC110258976 | 645284    | 646264    |
| NC_010444.4    | 142541444 | 142541675 | + | -1.86 | 4258  | 110259139 | LOC110259139 | 142537301 | 142549469 |
| NC_010444.4    | 10286115  | 10286643  | - | 1.88  | 3681  | 110259249 | LOC110259249 | 10280973  | 10290060  |
| NC_010444.4    | 67907142  | 67907373  | - | -0.54 | 550   | 110259338 | LOC110259338 | 67878961  | 67907808  |
| NC_010443.5    | 80241203  | 80241434  | - | -2.18 | 4347  | 110259440 | LOC110259440 | 80223165  | 80245666  |
| NC_010444.4    | 56082553  | 56082876  | + | -0.54 | 2411  | 110259604 | LOC110259604 | 56080303  | 56081294  |
| NC_010444.4    | 57505886  | 57506117  | + | -1.67 | -780  | 110259612 | LOC110259612 | 57506782  | 57507726  |
| NC_010444.4    | 151551367 | 151551655 | + | 3.46  | -1285 | 110259673 | LOC110259673 | 151552796 | 151555861 |
| NC_010443.5    | 263324324 | 263324612 | - | 2.05  | -4945 | 110259694 | LOC110259694 | 263318582 | 263319523 |
| NC_010443.5    | 263564109 | 263564469 | - | -1.86 | 4887  | 110259704 | LOC110259704 | 263568235 | 263569176 |
| NC_010444.4    | 61581477  | 61581798  | + | 1.20  | -1653 | 110259754 | LOC110259754 | 61583291  | 61584238  |
| NC_010445.4    | 4002081   | 4002369   | - | 2.05  | -2817 | 110260072 | LOC110260072 | 3993681   | 3999408   |
| NC_010446.5    | 103374908 | 103375145 | + | -0.12 | -1064 | 110260487 | LOC110260487 | 103376091 | 103390577 |
| NC_010447.5    | 21010059  | 21010425  | + | 2.46  | -1648 | 110260575 | LOC110260575 | 21011890  | 21012828  |
| NC_010447.5    | 79248545  | 79248776  | + | -1.93 | 4942  | 110260597 | LOC110260597 | 79243718  | 79244681  |
| NC_010447.5    | 16015824  | 16016112  | + | 1.88  | -451  | 110260660 | LOC110260660 | 16016419  | 16021676  |

|             |           |           |   |       |       |           |              |           |           |
|-------------|-----------|-----------|---|-------|-------|-----------|--------------|-----------|-----------|
| NC_010447.5 | 21052617  | 21053004  | - | 2.20  | -1324 | 110260850 | LOC110260850 | 21049913  | 21051486  |
| NC_010448.4 | 56524837  | 56525068  | + | -0.86 | 1800  | 110261040 | LOC110261040 | 56523152  | 56525114  |
| NC_010448.4 | 75002885  | 75003177  | - | 1.05  | -611  | 110261101 | LOC110261101 | 75000213  | 75002420  |
| NC_010448.4 | 57426073  | 57426361  | + | 2.46  | 4631  | 110261289 | LOC110261289 | 57421586  | 57442325  |
| NC_010448.4 | 57850332  | 57850563  | - | -2.35 | 2962  | 110261301 | LOC110261301 | 57852469  | 57853410  |
| NC_010448.4 | 61810210  | 61810485  | - | 1.24  | 101   | 110261314 | LOC110261314 | 61800668  | 61810449  |
| NC_010448.4 | 56993688  | 56993977  | + | 3.78  | 1189  | 110261367 | LOC110261367 | 56992643  | 56994111  |
| NC_010449.5 | 79605661  | 79605901  | - | -0.54 | -3846 | 110261611 | LOC110261611 | 79585433  | 79601935  |
| NC_010449.5 | 21622017  | 21622568  | - | 1.33  | 353   | 110261661 | LOC110261661 | 21621863  | 21622646  |
| NC_010449.5 | 20907058  | 20907400  | + | 3.63  | 146   | 110261663 | LOC110261663 | 20907083  | 20908336  |
| NC_010449.5 | 20906309  | 20906700  | - | 4.58  | 305   | 110261665 | LOC110261665 | 20906299  | 20906810  |
| NC_010450.4 | 66870391  | 66870683  | + | 2.27  | 2110  | 110262014 | LOC110262014 | 66868427  | 66874496  |
| NC_010462.3 | 9174689   | 9174981   | + | 3.27  | 444   | 396706    | LOC396706    | 9174391   | 9227673   |
| NC_010458.4 | 23761816  | 23762080  | - | -1.08 | -1886 | 397451    | LOC397451    | 23685565  | 23760062  |
| NC_010449.5 | 20882011  | 20882399  | - | 3.27  | 102   | 595122    | LOC595122    | 20881642  | 20882307  |
| NC_010448.4 | 103423340 | 103423628 | - | 1.46  | 1306  | 733637    | LOC733637    | 103413841 | 103424790 |
| NC_010444.4 | 73266609  | 73266897  | + | 1.88  | 443   | 100511917 | LONP1        | 73266310  | 73286774  |
| NC_010443.5 | 251977645 | 251977933 | - | 3.46  | 2039  | 100512581 | LPAR1        | 251811583 | 251979828 |
| NC_010453.5 | 19219375  | 19219667  | + | 0.98  | 3216  | 100738399 | LPAR6        | 19216305  | 19220913  |
| NC_010447.5 | 63708449  | 63708737  | + | 2.46  | 919   | 100627653 | LPCAT3       | 63707674  | 63746369  |
| NC_010459.5 | 43988653  | 43988941  | + | 1.78  | -4913 | 100170771 | LPIN3        | 43993710  | 44006188  |
| NC_010447.5 | 48703972  | 48704265  | - | -1.12 | 2608  | 100626686 | LRMP         | 48649067  | 48706727  |
| NC_010457.5 | 75750543  | 75750831  | - | 4.05  | 3917  | 100519689 | LRP2         | 75565299  | 75754604  |
| NC_010457.5 | 46444606  | 46444844  | - | 0.29  | 933   | 100155710 | LRP2BP       | 46383433  | 46445658  |
| NC_010443.5 | 196130546 | 196131413 | + | -2.12 | 1163  | 100157858 | LRRC19       | 196129816 | 196142696 |
| NC_010443.5 | 196129847 | 196130128 | + | -1.27 | 171   | 100157858 | LRRC19       | 196129816 | 196142696 |
| NC_010448.4 | 165134881 | 165135334 | + | 1.14  | 425   | 100525052 | LRRC41       | 165134682 | 165156915 |
| NC_010448.4 | 158334723 | 158335011 | - | 1.46  | 3435  | 100621320 | LRRC42       | 158316225 | 158338302 |
| NC_010448.4 | 158334319 | 158334608 | - | 1.20  | 3838  | 100621320 | LRRC42       | 158316225 | 158338302 |
| NC_010451.4 | 6662234   | 6662562   | + | 2.20  | -724  | 100520208 | LRRC51       | 6663122   | 6673272   |
| NC_010453.5 | 21126397  | 21126685  | - | 2.46  | -930  | 100738930 | LRRC63       | 21079430  | 21125611  |
| NC_010450.4 | 39126228  | 39126516  | - | 2.11  | -2449 | 100522021 | LRRC66       | 39104727  | 39123923  |
| NC_010446.5 | 51566204  | 51566435  | - | -0.12 | 4081  | 100152599 | LRRCC1       | 51525044  | 51570401  |
| NC_010455.5 | 36885793  | 36886024  | - | -2.12 | -4322 | 106505617 | LRTM1        | 36870269  | 36881586  |

|                |           |           |   |       |       |           |           |           |           |
|----------------|-----------|-----------|---|-------|-------|-----------|-----------|-----------|-----------|
| NC_010458.4    | 65595727  | 65596027  | - | 2.88  | 4728  | 100522906 | LSM11     | 65587502  | 65600605  |
| NC_010448.4    | 43851929  | 43852330  | + | 2.10  | 4247  | 100511455 | LSM14A    | 43847882  | 43901697  |
| NC_010444.4    | 76245150  | 76245489  | + | 0.46  | -1690 | 100515470 | LSM7      | 76247010  | 76251824  |
| NC_010448.4    | 44759523  | 44759811  | + | 2.20  | 576   | 100516738 | LSR       | 44759091  | 44773378  |
| NC_010447.5    | 87487717  | 87488123  | + | 0.78  | 1368  | 100154219 | LTA4H     | 87486552  | 87518520  |
| NC_010455.5    | 192357707 | 192357995 | - | -0.54 | 911   | 106505847 | LTN1      | 192295764 | 192358762 |
| NC_010454.4    | 27005660  | 27006028  | + | 3.56  | 942   | 100625081 | LUC7L3    | 27004902  | 27032156  |
| NC_010443.5    | 209667735 | 209668023 | - | 1.10  | 1045  | 102165373 | LURAP1L   | 209621712 | 209668924 |
| NC_010461.5    | 94627185  | 94627476  | + | 3.05  | -4159 | 100153362 | LUZP4     | 94631490  | 94647712  |
| NC_010446.5    | 1299328   | 1299616   | - | 3.05  | 713   | 106509930 | LY6L      | 1296421   | 1300185   |
| NC_010454.4    | 44278317  | 44278616  | - | 3.78  | -191  | 100623359 | LYRM9     | 44271407  | 44278275  |
| NC_010459.5    | 32509087  | 32509488  | + | 2.68  | 399   | 100625861 | LZTS3     | 32508888  | 32518524  |
| NC_010453.5    | 11525147  | 11525530  | - | -1.54 | -3702 | 100155671 | MAB21L1   | 11518398  | 11521636  |
| NC_010459.5    | 22635272  | 22636071  | + | 4.37  | 566   | 102159435 | MACROD2   | 22635105  | 24677199  |
| NC_010448.4    | 71779284  | 71779572  | - | 3.78  | -253  | 100736650 | MAD2L2    | 71773680  | 71779175  |
| NC_010444.4    | 15314013  | 15314301  | - | 2.78  | 1008  | 100514701 | MADD      | 15271581  | 15315165  |
| NC_010457.5    | 103578738 | 103578969 | + | 1.05  | -72   | 100522576 | MAIP1     | 103578926 | 103590719 |
| NW_018085072.1 | 128649    | 128880    | + | 0.14  | -1090 | 100511048 | MAK16     | 129855    | 139558    |
| NC_010443.5    | 42731256  | 42731590  | + | -2.00 | 1701  | 396919    | MAN1A1    | 42729722  | 42896290  |
| NC_010446.5    | 103377578 | 103377924 | - | 2.27  | -619  | 100154147 | MAN1A2    | 103214929 | 103377132 |
| NC_010443.5    | 62888005  | 62888293  | + | 1.46  | 460   | 100154996 | MANEA     | 62887689  | 62945586  |
| NC_010443.5    | 165458590 | 165458987 | + | 1.27  | -21   | 106504229 | MAP2K5    | 165458810 | 165705612 |
| NC_010457.5    | 16915819  | 16916123  | + | 1.46  | 4854  | 100511286 | MAP3K19   | 16911117  | 16976598  |
| NC_010443.5    | 184402064 | 184402295 | + | -1.12 | 846   | 100526089 | MAPK11P1L | 184401333 | 184416383 |
| NC_010443.5    | 119757539 | 119757890 | - | -0.60 | 1926  | 396833    | MAPK6     | 119725026 | 119759641 |
| NC_010454.4    | 60148154  | 60148442  | - | 2.05  | 445   | 102164433 | MAPK7     | 60144138  | 60148743  |
| NC_010457.5    | 24503357  | 24503588  | + | -0.35 | 537   | 100516298 | MARCO     | 24502935  | 24541286  |
| NC_010452.4    | 48856937  | 48857168  | + | -1.67 | 1157  | 100514867 | MASTL     | 48855895  | 48877504  |
| NC_010458.4    | 60272385  | 60272864  | - | 0.46  | 1603  | 100217381 | MAT2B     | 60255541  | 60274228  |
| NC_010458.4    | 60270434  | 60270722  | - | -1.71 | 3650  | 100217381 | MAT2B     | 60255541  | 60274228  |
| NC_010445.4    | 18043644  | 18043950  | + | 2.46  | 765   | 100622994 | MAZ       | 18043032  | 18047531  |
| NC_010461.5    | 108568226 | 108568650 | - | 2.10  | 379   | 100512149 | MBNL3     | 108488224 | 108568817 |
| NC_010449.5    | 46103538  | 46103900  | - | 1.78  | 706   | 100154824 | MCM3      | 46084648  | 46104425  |
| NC_010461.5    | 98729766  | 98730054  | + | 2.20  | 52    | 100511797 | MCTS1     | 98729858  | 98742967  |

|             |           |           |   |       |       |           |         |           |           |
|-------------|-----------|-----------|---|-------|-------|-----------|---------|-----------|-----------|
| NC_010449.5 | 23247362  | 23247593  | - | -1.67 | 261   | 100144453 | MDC1    | 23229508  | 23247739  |
| NC_010449.5 | 23246197  | 23246656  | - | -2.86 | 1312  | 100144453 | MDC1    | 23229508  | 23247739  |
| NC_010443.5 | 100421757 | 100421988 | + | -0.54 | 2468  | 100524659 | ME2     | 100419404 | 100475778 |
| NC_010454.4 | 22830058  | 22830394  | + | -0.27 | -179  | 100513621 | MED1    | 22830405  | 22872420  |
| NC_010454.4 | 52151832  | 52152120  | - | 1.46  | 390   | 100513494 | MED11   | 52150535  | 52152366  |
| NC_010458.4 | 66114925  | 66115213  | + | 2.05  | 202   | 733689    | MED7    | 66114867  | 66121096  |
| NC_010454.4 | 60933959  | 60934247  | - | 2.05  | -104  | 100512681 | MED9    | 60925161  | 60933999  |
| NC_010444.4 | 96275261  | 96275612  | - | -3.00 | 921   | 733590    | MEF2C   | 96122407  | 96276358  |
| NC_010452.4 | 46800352  | 46800640  | - | 3.05  | 105   | 100626847 | MEIG1   | 46790501  | 46800601  |
| NC_010457.5 | 78095289  | 78095520  | + | -0.12 | -1296 | 100522284 | METAP1D | 78096701  | 78182281  |
| NC_010450.4 | 105052167 | 105052415 | - | -2.35 | 1312  | 100525761 | METTL14 | 105019539 | 105053603 |
| NC_010445.4 | 34054265  | 34054496  | - | -2.35 | 1093  | 100523174 | METTL22 | 34035901  | 34055474  |
| NC_010445.4 | 23718853  | 23719139  | - | -0.12 | 1226  | 100628086 | METTL9  | 23670063  | 23720222  |
| NC_010449.5 | 50750785  | 50751073  | - | 0.88  | 2190  | 110261545 | MEX3B   | 50747828  | 50753119  |
| NC_010443.5 | 127741749 | 127742117 | + | 2.88  | 526   | 100157390 | MFAP1   | 127741407 | 127756168 |
| NC_010454.4 | 4798702   | 4798974   | - | -1.86 | 1126  | 100622284 | MFSD11  | 4774675   | 4799964   |
| NC_010457.5 | 95016571  | 95016883  | + | 2.78  | 1446  | 100037960 | MFSD6   | 95015281  | 95102228  |
| NC_010460.4 | 7862597   | 7862876   | - | -0.86 | 977   | 100623494 | MGAM2   | 7767831   | 7863714   |
| NC_010450.4 | 87389209  | 87389582  | - | 1.68  | 841   | 100622296 | MGST2   | 87318180  | 87390237  |
| NC_010456.5 | 75444444  | 75445007  | - | 3.22  | 902   | 100155980 | MICU1   | 75203731  | 75445628  |
| NC_010448.4 | 135511069 | 135511300 | - | -0.54 | 1353  | 100625285 | MIGA1   | 135423411 | 135512538 |
| NC_010448.4 | 135511787 | 135512075 | - | 0.29  | 607   | 100625285 | MIGA1   | 135423411 | 135512538 |
| NC_010443.5 | 113257189 | 113257420 | - | -1.93 | 1456  | 102161333 | MINDY2  | 113171047 | 113258761 |
| NC_010452.4 | 45979369  | 45980364  | + | 1.84  | -223  | 100525772 | MINDY3  | 45980090  | 46062700  |
| NC_010448.4 | 78008917  | 78009168  | + | 0.29  | -2443 | 100623381 | MINOS1  | 78011486  | 78045919  |
| NC_010456.5 | 99575146  | 99575389  | + | -0.54 | 841   | 100152243 | MINPP1  | 99574426  | 99628388  |
| NC_010451.4 | 77852375  | 77852663  | + | 2.20  | 754   | 100337662 | MIOS    | 77851765  | 77892417  |
| NC_010459.5 | 19362041  | 19362387  | - | 2.29  | 793   | 100157552 | MKKS    | 19341024  | 19363007  |
| NC_010459.5 | 19362661  | 19362892  | - | 0.46  | 230   | 100157552 | MKKS    | 19341024  | 19363007  |
| NC_010448.4 | 164887519 | 164887972 | + | 1.05  | 25    | 100233194 | MKMK1   | 164887720 | 164933526 |
| NC_010455.5 | 68546326  | 68546614  | + | 1.05  | -12   | 100626891 | MKRN2   | 68546482  | 68584341  |
| NC_010443.5 | 202314378 | 202314666 | + | 0.73  | -2936 | 100524063 | MLLT3   | 202317458 | 202604308 |
| NC_010443.5 | 202313661 | 202314011 | + | 0.46  | -3622 | 100524063 | MLLT3   | 202317458 | 202604308 |
| NC_010443.5 | 202318143 | 202318463 | + | 1.68  | 845   | 100524063 | MLLT3   | 202317458 | 202604308 |



|                |           |           |   |       |       |           |        |           |           |
|----------------|-----------|-----------|---|-------|-------|-----------|--------|-----------|-----------|
| NC_010455.5    | 95023320  | 95023551  | + | -0.54 | 1276  | 100511536 | MME    | 95022159  | 95122977  |
| NC_010451.4    | 33486077  | 33486393  | - | 2.46  | -2605 | 100101475 | MMP12  | 33473625  | 33483630  |
| NC_010450.4    | 129172109 | 129172351 | - | -2.71 | 1183  | 100516922 | MMRN1  | 129113951 | 129173413 |
| NC_010443.5    | 64460333  | 64460632  | - | 3.05  | -528  | 100513056 | MMS22L | 64306078  | 64459954  |
| NC_010443.5    | 189691662 | 189691894 | + | -1.54 | 1434  | 100310799 | MNAT1  | 189690344 | 189845924 |
| NC_010450.4    | 75754500  | 75754788  | - | 1.20  | 1167  | 100517105 | MND1   | 75689845  | 75755811  |
| NC_010445.4    | 68853227  | 68853670  | + | -0.80 | 979   | 100738341 | MOB1A  | 68852469  | 68876706  |
| NC_010457.5    | 101391712 | 101391949 | + | -1.71 | 917   | 613127    | MOBKL3 | 101390913 | 101420282 |
| NC_010457.5    | 101391316 | 101391604 | + | 1.46  | 547   | 613127    | MOBKL3 | 101390913 | 101420282 |
| NW_018084979.1 | 1081257   | 1081549   | - | 0.88  | 282   | 100520316 | MOK    | 1046000   | 1081685   |
| NC_010448.4    | 10725686  | 10725974  | - | 3.78  | -541  | 100520385 | MON1B  | 10713721  | 10725289  |
| NC_010447.5    | 27127191  | 27127877  | + | -1.53 | 1413  | 100154568 | MON2   | 27126121  | 27246725  |
| NC_010461.5    | 110783583 | 110784094 | - | 2.46  | 2484  | 100359355 | MOSPD1 | 110693538 | 110786323 |
| NC_010454.4    | 52878823  | 52879111  | + | 0.98  | 43    | 733696    | MPDU1  | 52878924  | 52882854  |
| NC_010443.5    | 53272449  | 53272828  | + | 1.27  | 3702  | 100515980 | MRAP2  | 53268936  | 53318111  |
| NC_010455.5    | 79139442  | 79139741  | + | 1.46  | -141  | 100621398 | MRAS   | 79139733  | 79211139  |
| NC_010454.4    | 47086883  | 47087171  | - | 2.20  | 366   | 100522640 | MRM3   | 47077812  | 47087393  |
| NC_010448.4    | 157736083 | 157736371 | - | 1.78  | -1921 | 100513545 | MROH7  | 157657492 | 157734306 |
| NC_010459.5    | 40308098  | 40308444  | - | 1.78  | -4372 | 100736939 | MROH8  | 40289934  | 40303899  |
| NC_010446.5    | 18609426  | 18609714  | + | 1.88  | 651   | 100153348 | MRPL13 | 18608919  | 18671523  |
| NC_010458.4    | 68277407  | 68277749  | - | 1.14  | 102   | 100739015 | MRPL22 | 68229725  | 68277680  |
| NC_010458.4    | 68276835  | 68277140  | - | -1.86 | 692   | 100739015 | MRPL22 | 68229725  | 68277680  |
| NC_010454.4    | 26669366  | 26669941  | - | 2.46  | 467   | 100737651 | MRPL27 | 26663884  | 26670121  |
| NC_010445.4    | 58571386  | 58571674  | - | 1.20  | 3580  | 100517705 | MRPL35 | 58559523  | 58575110  |
| NC_010456.5    | 112069984 | 112070570 | - | 0.88  | -51   | 100152229 | MRPL43 | 112068678 | 112070226 |
| NC_010454.4    | 23766020  | 23766662  | - | 0.14  | 135   | 100628029 | MRPL45 | 23751921  | 23766476  |
| NC_010444.4    | 74927279  | 74927567  | - | 2.20  | 773   | 100521888 | MRPL54 | 74925064  | 74928196  |
| NC_010443.5    | 191317697 | 191317985 | - | 3.78  | 4110  | 414415    | MRPS11 | 191310547 | 191321951 |
| NC_010455.5    | 80208017  | 80208248  | + | -0.76 | -230  | 100158122 | MRPS22 | 80208363  | 80232107  |
| NC_010454.4    | 34129771  | 34130167  | - | 2.78  | -395  | 100511221 | MRPS23 | 34123679  | 34129574  |
| NC_010446.5    | 56607355  | 56607586  | + | -0.71 | -195  | 100152709 | MRPS28 | 56607666  | 56706918  |
| NC_010460.4    | 8883879   | 8884233   | + | 1.20  | 591   | 100624933 | MRPS33 | 8883465   | 8894473   |
| NC_010444.4    | 11192774  | 11193031  | - | -0.35 | 826   | 100627859 | MS4A12 | 11177406  | 11193729  |
| NC_010444.4    | 11423449  | 11423754  | - | 1.88  | -3287 | 397166    | MS4A2  | 11400415  | 11420314  |

|             |           |           |   |       |       |           |        |           |           |
|-------------|-----------|-----------|---|-------|-------|-----------|--------|-----------|-----------|
| NC_010444.4 | 89251015  | 89251330  | + | 2.05  | -4474 | 100512158 | MSH3   | 89255647  | 89456102  |
| NC_010455.5 | 77178605  | 77179035  | - | 2.20  | 2590  | 100155763 | MSL2   | 77147823  | 77181410  |
| NC_010446.5 | 124124583 | 124125025 | - | 0.42  | -366  | 100156808 | MTF2   | 124051586 | 124124438 |
| NC_010451.4 | 27974345  | 27974995  | - | 0.27  | -222  | 100518140 | MTMR2  | 27864335  | 27974448  |
| NC_010459.5 | 5505628   | 5505924   | - | 1.88  | 1436  | 100153650 | MTUS1  | 5331668   | 5507212   |
| NC_010448.4 | 166004683 | 166005017 | + | 3.05  | 1220  | 100513867 | MUTYH  | 166003630 | 166012191 |
| NC_010448.4 | 166003529 | 166003833 | + | 2.78  | 51    | 100513867 | MUTYH  | 166003630 | 166012191 |
| NC_010444.4 | 60275410  | 60275698  | - | 2.68  | 418   | 110259321 | MVB12A | 60271020  | 60275972  |
| NC_010445.4 | 72543547  | 72543778  | - | -1.08 | 1639  | 100625349 | MXD1   | 72517829  | 72545302  |
| NC_010444.4 | 80637203  | 80637529  | + | 2.05  | 588   | 100512157 | MXD3   | 80636778  | 80641346  |
| NC_010446.5 | 12461920  | 12462324  | - | 0.20  | -1762 | 448810    | MYC    | 12455141  | 12460360  |
| NC_010455.5 | 22975543  | 22975999  | + | 1.78  | -1180 | 396646    | MYD88  | 22976951  | 22979568  |
| NC_010455.5 | 29739465  | 29739759  | - | 1.16  | -3996 | 100515755 | MYL3   | 29730271  | 29735616  |
| NC_010455.5 | 108436531 | 108436848 | + | -2.03 | 1494  | 100625538 | MYNN   | 108435195 | 108452699 |
| NC_010458.4 | 6144839   | 6145127   | - | 2.05  | 502   | 396902    | MYO10  | 5907111   | 6145485   |
| NC_010453.5 | 45018736  | 45019024  | - | 3.05  | 129   | 100521289 | MZT1   | 45000735  | 45019009  |
| NC_010450.4 | 87691301  | 87691649  | - | 0.88  | -162  | 100513554 | NAA15  | 87608439  | 87691313  |
| NC_010452.4 | 29319021  | 29319256  | - | -3.12 | 3570  | 100517363 | NAA35  | 29221531  | 29322709  |
| NC_010447.5 | 21625973  | 21626261  | + | -0.12 | 1401  | 100154321 | NABP2  | 21624716  | 21631716  |
| NC_010445.4 | 71513541  | 71513829  | - | 0.88  | -696  | 100523729 | NAGK   | 71496191  | 71512989  |
| NC_010445.4 | 71511957  | 71512267  | - | 1.05  | 877   | 100523729 | NAGK   | 71496191  | 71512989  |
| NC_010456.5 | 128964086 | 128964317 | + | -0.12 | 1890  | 100157783 | NANOS1 | 128962311 | 128964207 |
| NC_010443.5 | 106933629 | 106934202 | - | 0.29  | -810  | 100513328 | NARS   | 106911267 | 106933105 |
| NC_010451.4 | 13011304  | 13011535  | - | 1.05  | -522  | 100514245 | NARS2  | 12869347  | 13010897  |
| NC_010444.4 | 26827168  | 26827456  | - | 2.27  | -252  | 100511365 | NAT10  | 26786172  | 26827060  |
| NC_010457.5 | 106515888 | 106516119 | + | -2.35 | -278  | 100514254 | NBEAL1 | 106516282 | 106686685 |
| NC_010454.4 | 19788301  | 19788781  | - | 2.05  | 467   | 100625110 | NBR1   | 19755733  | 19789008  |
| NC_010455.5 | 133173389 | 133173677 | + | 2.46  | -3676 | 100156513 | NCBP2  | 133177209 | 133192935 |
| NC_010448.4 | 91748297  | 91748975  | + | 2.75  | 744   | 110261145 | NCDN   | 91747892  | 91756812  |
| NC_010457.5 | 88526878  | 88527109  | - | -0.86 | 1423  | 100158033 | NCKAP1 | 88425861  | 88528417  |
| NC_010457.5 | 88531381  | 88531612  | - | -1.12 | -3079 | 100158033 | NCKAP1 | 88425861  | 88528417  |
| NC_010457.5 | 18411250  | 18411496  | + | -1.71 | 280   | 100513689 | NCKAP5 | 18411093  | 19462362  |
| NC_010445.4 | 114136298 | 114136586 | - | 0.46  | 986   | 574068    | NCOA1  | 113997218 | 114137428 |
| NC_010443.5 | 142412999 | 142413287 | + | 3.05  | 455   | 100144475 | NDN    | 142412688 | 142413665 |

|             |           |           |   |       |       |           |         |           |           |
|-------------|-----------|-----------|---|-------|-------|-----------|---------|-----------|-----------|
| NC_010444.4 | 151457603 | 151457942 | + | 3.27  | -4548 | 110259541 | NDST1   | 151462321 | 151525909 |
| NC_010457.5 | 139031482 | 139031770 | - | 3.78  | 266   | 100521478 | NDUFA10 | 138999174 | 139031892 |
| NC_010459.5 | 22480865  | 22481251  | + | 2.05  | 713   | 100520522 | NDUFAF5 | 22480345  | 22508804  |
| NC_010455.5 | 139730035 | 139730578 | - | 0.24  | 185   | 100624335 | NDUFB4  | 139724145 | 139730492 |
| NC_010450.4 | 87695818  | 87696049  | + | 0.46  | 660   | 100037985 | NDUFC1  | 87695273  | 87700024  |
| NC_010457.5 | 109448820 | 109449051 | - | -0.80 | 2877  | 100516402 | NDUFS1  | 109413726 | 109451813 |
| NC_010458.4 | 32874340  | 32874742  | + | 1.68  | 123   | 100516161 | NDUFS4  | 32874418  | 32982661  |
| NC_010459.5 | 37177672  | 37177960  | - | 2.05  | -552  | 100620656 | NECAB3  | 37160431  | 37177264  |
| NC_010451.4 | 46892270  | 46892558  | - | 0.88  | -850  | 397247    | NECTIN1 | 46823552  | 46891564  |
| NC_010447.5 | 86731931  | 86732219  | - | 1.46  | 1437  | 100514234 | NEDD1   | 86693802  | 86733512  |
| NC_010456.5 | 20142026  | 20142257  | + | -2.35 | -2522 | 100520589 | NEK1    | 20144664  | 20332248  |
| NC_010452.4 | 20968936  | 20969229  | + | 0.73  | 2422  | 100521742 | NEK7    | 20966660  | 21124270  |
| NC_010454.4 | 44965036  | 44965324  | + | 1.20  | 2085  | 100514006 | NEK8    | 44963095  | 44975092  |
| NC_010448.4 | 28667580  | 28667912  | + | -1.71 | 1244  | 100739450 | NFATC3  | 28666502  | 28806423  |
| NC_010448.4 | 151228962 | 151229193 | - | -1.12 | 695   | 100523676 | NFIA    | 150834002 | 151229773 |
| NC_010456.5 | 2601435   | 2601856   | - | -0.37 | 1609  | 100153822 | NFIL3   | 2588887   | 2603255   |
| NC_010448.4 | 47703788  | 47704076  | + | 1.46  | 288   | 100621111 | NFKBIB  | 47703644  | 47712661  |
| NC_010455.5 | 157271245 | 157271836 | - | 2.49  | 1578  | 100520981 | NFKBIZ  | 157261419 | 157273119 |
| NC_010451.4 | 56655079  | 56655367  | - | 3.78  | 833   | 100624755 | NFRKB   | 56616865  | 56656056  |
| NC_010445.4 | 72982986  | 72983344  | + | 3.46  | 90    | 102165918 | NFU1    | 72983075  | 73013227  |
| NC_010458.4 | 27855359  | 27855667  | + | 1.68  | -2595 | 100524404 | NIM1K   | 27858108  | 27930365  |
| NC_010454.4 | 20722412  | 20722700  | - | 2.05  | 585   | 100524706 | NKIRAS2 | 20717545  | 20723141  |
| NC_010445.4 | 41320255  | 41320543  | - | 1.78  | 603   | 100233195 | NME4    | 41306167  | 41321002  |
| NC_010444.4 | 140167269 | 140167557 | - | 2.78  | 1242  | 100621441 | NME5    | 140132871 | 140168655 |
| NC_010457.5 | 941027    | 941289    | + | -0.95 | -221  | 100621233 | NMI     | 941379    | 966519    |
| NC_010443.5 | 228140966 | 228141254 | - | 3.27  | 780   | 100518171 | NMRK1   | 228113323 | 228141890 |
| NC_010445.4 | 125866276 | 125866564 | + | 2.46  | 4998  | 100512777 | NOL10   | 125861422 | 125956626 |
| NC_010454.4 | 14035887  | 14036118  | + | 0.29  | 353   | 106504086 | NOL11   | 14035649  | 14058421  |
| NC_010459.5 | 36196569  | 36196947  | - | 2.20  | 4277  | 100511968 | NOL4L   | 36070836  | 36201035  |
| NC_010448.4 | 67395637  | 67395868  | - | -1.35 | 689   | 100518312 | NOL9    | 67375212  | 67396442  |
| NC_010456.5 | 113158348 | 113158636 | + | 2.46  | 3873  | 100517974 | NOLC1   | 113154619 | 113166922 |
| NC_010457.5 | 105894752 | 105895040 | + | 1.05  | 1288  | 100156132 | NOP58   | 105893608 | 105930458 |
| NC_010449.5 | 74990474  | 74990762  | - | 2.20  | 1490  | 100154880 | NOP9    | 74985748  | 74992108  |
| NC_010448.4 | 54636272  | 54636638  | - | 0.24  | -424  | 100518311 | NOSIP   | 54618977  | 54636031  |

|             |           |           |   |       |       |           |         |           |           |
|-------------|-----------|-----------|---|-------|-------|-----------|---------|-----------|-----------|
| NC_010445.4 | 46378810  | 46379098  | - | 2.05  | -675  | 100523176 | NPHP1   | 46316864  | 46378279  |
| NC_010455.5 | 73899850  | 73900138  | - | 1.20  | 1025  | 100521403 | NPHP3   | 73857414  | 73901019  |
| NC_010458.4 | 52780359  | 52780651  | - | 1.27  | 1266  | 100525313 | NPM1    | 52767455  | 52781771  |
| NC_010458.4 | 52780878  | 52781323  | - | 2.20  | 670   | 100525313 | NPM1    | 52767455  | 52781771  |
| NC_010456.5 | 112821655 | 112821995 | - | 0.88  | 419   | 100627227 | NPM3    | 112819390 | 112822244 |
| NC_010449.5 | 59771157  | 59771497  | + | 1.88  | 2703  | 100155307 | NPTN    | 59768624  | 59840594  |
| NC_010455.5 | 10755511  | 10755911  | + | 1.14  | -1243 | 100621076 | NR1D2   | 10756954  | 10791219  |
| NC_010455.5 | 140404109 | 140404340 | - | -1.44 | 1902  | 397228    | NR1I2   | 140373571 | 140406127 |
| NC_010444.4 | 100445908 | 100446466 | + | 1.73  | -2361 | 100621341 | NR2F1   | 100448548 | 100457510 |
| NC_010444.4 | 100444610 | 100444902 | + | 1.88  | -3792 | 100621341 | NR2F1   | 100448548 | 100457510 |
| NC_010446.5 | 105846484 | 105846715 | + | -1.67 | 686   | 100739349 | NRAS    | 105845913 | 105853769 |
| NC_010449.5 | 19003650  | 19003881  | + | -1.27 | -4026 | 100154240 | NRSN1   | 19007792  | 19027226  |
| NC_010450.4 | 939581    | 939869    | + | 3.78  | -4675 | 100515039 | NSD2    | 944400    | 1018032   |
| NC_010457.5 | 48137341  | 48137654  | + | -0.54 | 1151  | 100520868 | NSD3    | 48136346  | 48245673  |
| NC_010457.5 | 48138511  | 48138869  | + | -1.27 | 2344  | 100520868 | NSD3    | 48136346  | 48245673  |
| NC_010443.5 | 144474121 | 144474724 | - | 1.78  | -396  | 100620354 | NSMCE3  | 144469617 | 144474026 |
| NC_010447.5 | 80621734  | 80622022  | + | 3.46  | -3791 | 100521376 | NT5DC3  | 80625669  | 80692481  |
| NC_010445.4 | 39935487  | 39935850  | + | 2.46  | 40    | 100516255 | NTHL1   | 39935628  | 39941718  |
| NC_010460.4 | 5927841   | 5928129   | - | -0.54 | 894   | 100517250 | NUB1    | 5899566   | 5928879   |
| NC_010451.4 | 66433964  | 66434276  | - | 2.46  | 1428  | 100626322 | NUCKS1  | 66398845  | 66435548  |
| NC_010444.4 | 109059252 | 109059540 | - | 3.78  | 325   | 100512459 | NUDT12  | 109044946 | 109059721 |
| NC_010456.5 | 75917609  | 75917859  | + | 1.05  | -342  | 106504089 | NUDT13  | 75918076  | 75958187  |
| NC_010453.5 | 19583696  | 19583997  | - | -0.93 | 718   | 100621855 | NUDT15  | 19572963  | 19584565  |
| NC_010448.4 | 29340234  | 29340481  | + | -2.71 | 464   | 100625681 | NUDT21  | 29339893  | 29359596  |
| NC_010460.4 | 13777490  | 13777802  | - | 2.27  | 127   | 100523151 | NUP205  | 13674301  | 13777773  |
| NC_010446.5 | 95570883  | 95571114  | + | -1.54 | -2975 | 100157113 | NUP210L | 95573974  | 95697196  |
| NC_010454.4 | 6104251   | 6104539   | - | 0.14  | -558  | 100526070 | NUP85   | 6072731   | 6103837   |
| NC_010443.5 | 44185810  | 44186098  | - | 1.27  | 270   | 100154658 | NUS1    | 44156771  | 44186224  |
| NC_010443.5 | 44183056  | 44183298  | - | -2.71 | 3047  | 100154658 | NUS1    | 44156771  | 44186224  |
| NC_010443.5 | 44184913  | 44185304  | - | -0.71 | 1115  | 100154658 | NUS1    | 44156771  | 44186224  |
| NC_010443.5 | 130065576 | 130066235 | - | 2.46  | -264  | 106509022 | NUSAP1  | 129992797 | 130065641 |
| NC_010456.5 | 38863131  | 38863419  | - | 1.20  | 4152  | 397570    | OAS1    | 38851083  | 38867427  |
| NC_010456.5 | 38846909  | 38847234  | - | 2.46  | -917  | 595128    | OAS2    | 38827667  | 38846154  |
| NC_010443.5 | 130035973 | 130036284 | + | 2.68  | -349  | 100516409 | OIP5    | 130036478 | 130054058 |

|             |           |           |   |       |       |           |          |           |           |
|-------------|-----------|-----------|---|-------|-------|-----------|----------|-----------|-----------|
| NC_010449.5 | 22513015  | 22513303  | + | 3.78  | -2516 | 100141414 | OLF42-3  | 22515675  | 22516659  |
| NC_010443.5 | 26803429  | 26803717  | + | 2.46  | 2902  | 100153431 | OLIG3    | 26800671  | 26801489  |
| NC_010448.4 | 153878240 | 153878813 | + | 2.27  | -3908 | 100626843 | OMA1     | 153882435 | 153950460 |
| NC_010448.4 | 51963784  | 51964091  | - | 2.73  | 3686  | 106508274 | OPA3     | 51917956  | 51967624  |
| NC_010459.5 | 62906873  | 62907161  | + | 2.20  | 1317  | 397364    | OPRL1    | 62905700  | 62913018  |
| NC_010444.4 | 11876455  | 11876743  | + | 2.46  | 305   | 100515007 | OSBP     | 11876294  | 11911660  |
| NC_010444.4 | 11875559  | 11875886  | + | 2.68  | -571  | 100515007 | OSBP     | 11876294  | 11911660  |
| NC_010448.4 | 109218593 | 109218966 | - | 1.27  | -317  | 100511459 | OSBPL1A  | 108997736 | 109218462 |
| NC_010456.5 | 47247314  | 47247643  | - | 1.78  | -642  | 100152038 | OSM      | 47242767  | 47246836  |
| NC_010446.5 | 37898035  | 37898456  | - | 2.01  | -726  | 100155180 | OSR2     | 37890200  | 37897519  |
| NC_010448.4 | 78241753  | 78242151  | + | 3.05  | 340   | 110261108 | OTUD3    | 78241612  | 78273544  |
| NC_010458.4 | 26659180  | 26659468  | - | 1.27  | 415   | 396978    | OXCT1    | 26514497  | 26659739  |
| NC_010446.5 | 30931602  | 30931890  | - | 2.20  | -2195 | 100153332 | OXR1     | 30735844  | 30929551  |
| NC_010456.5 | 31457343  | 31457591  | - | 0.46  | 2069  | 497623    | P2RX7    | 31415188  | 31459536  |
| NC_010456.5 | 75919008  | 75919478  | - | 1.46  | -122  | 100037299 | P4HA1    | 75827207  | 75919121  |
| NC_010444.4 | 134535128 | 134535416 | - | 3.05  | -1057 | 100623801 | P4HA2    | 134502210 | 134534215 |
| NC_010447.5 | 21496886  | 21497174  | + | 2.20  | 1022  | 100737962 | PA2G4    | 21496008  | 21503297  |
| NC_010444.4 | 15381909  | 15382197  | + | 2.78  | -669  | 100512824 | PACSIN3  | 15382722  | 15389893  |
| NC_010451.4 | 44513261  | 44513603  | + | 2.46  | 318   | 100523683 | PAFAH1B2 | 44513114  | 44534312  |
| NC_010447.5 | 81386652  | 81386940  | + | 3.46  | 1395  | 100521900 | PAH      | 81385401  | 81460569  |
| NC_010459.5 | 31826420  | 31826764  | - | 3.46  | -4396 | 100520054 | PANK2    | 31797604  | 31822196  |
| NC_010459.5 | 31826837  | 31827143  | - | -1.35 | -4794 | 100520054 | PANK2    | 31797604  | 31822196  |
| NC_010444.4 | 88329005  | 88329293  | + | 1.37  | 848   | 100512336 | PAPD4    | 88328301  | 88388242  |
| NC_010458.4 | 75254748  | 75255036  | - | 2.46  | 4913  | 100517864 | PAPD7    | 75217212  | 75259805  |
| NC_010449.5 | 117675492 | 117675746 | + | -0.80 | -464  | 100156323 | PAPOLA   | 117676083 | 117740340 |
| NC_010445.4 | 81024527  | 81025086  | - | 2.46  | 562   | 100523547 | PAPOLG   | 80986395  | 81025369  |
| NC_010455.5 | 83668551  | 83668909  | - | 0.88  | 792   | 100516760 | PAQR9    | 83660387  | 83669522  |
| NC_010459.5 | 52192016  | 52192304  | + | 1.88  | -3200 | 100151957 | PARD6B   | 52195360  | 52211504  |
| NC_010447.5 | 66439447  | 66439678  | + | -2.44 | -4030 | 100524437 | PARP11   | 66443593  | 66483630  |
| NC_010458.4 | 30306937  | 30307225  | + | 1.78  | 1418  | 100511108 | PARP8    | 30305663  | 30486416  |
| NC_010448.4 | 150604576 | 150604908 | - | 3.27  | 823   | 100524203 | PATJ     | 150248714 | 150605565 |
| NC_010456.5 | 11563213  | 11563501  | - | 3.63  | 3540  | 100141310 | PBK      | 11543657  | 11566897  |
| NC_010449.5 | 24226701  | 24227239  | - | 2.29  | -30   | 100144541 | PBX2     | 24221565  | 24226940  |
| NC_010449.5 | 24224790  | 24225110  | - | 3.78  | 1990  | 100144541 | PBX2     | 24221565  | 24226940  |

|             |           |           |   |       |       |           |         |           |           |
|-------------|-----------|-----------|---|-------|-------|-----------|---------|-----------|-----------|
| NC_010446.5 | 92036972  | 92037506  | - | 0.73  | 3485  | 100038007 | PCD1B   | 92035122  | 92040724  |
| NC_010444.4 | 143498219 | 143498507 | - | 0.46  | 2841  | 100626940 | PCDH1   | 143475931 | 143501204 |
| NC_010444.4 | 142865639 | 142866040 | + | 2.27  | -2301 | 102166091 | PCDHB6  | 142868141 | 142872850 |
| NC_010453.5 | 78555800  | 78556168  | - | 0.61  | 800   | 100518091 | PCID2   | 78541278  | 78556784  |
| NC_010455.5 | 133802073 | 133802361 | + | 0.61  | 1256  | 100512194 | PCYT1A  | 133800961 | 133851004 |
| NC_010455.5 | 19598054  | 19598416  | + | -0.54 | 1171  | 100512811 | PDCD6IP | 19597064  | 19664047  |
| NC_010447.5 | 52734000  | 52734288  | - | 1.88  | 3627  | 396555    | PDE3A   | 52413503  | 52737771  |
| NC_010450.4 | 104273187 | 104273573 | + | -1.12 | 1445  | 397616    | PDE5A   | 104271935 | 104420955 |
| NC_010450.4 | 104271763 | 104272108 | + | 3.05  | 0     | 397616    | PDE5A   | 104271935 | 104420955 |
| NC_010450.4 | 123923904 | 123924192 | - | 2.05  | 3371  | 100514859 | PDHA2   | 123926253 | 123927419 |
| NC_010457.5 | 46543729  | 46544020  | - | 1.14  | 2708  | 414421    | PDLIM3  | 46516178  | 46546583  |
| NC_010459.5 | 35615711  | 35616208  | - | 2.88  | 107   | 100738964 | PDRG1   | 35608805  | 35616067  |
| NC_010453.5 | 9016098   | 9016386   | + | 3.05  | 1491  | 100154396 | PDS5B   | 9014751   | 9222825   |
| NC_010453.5 | 5300813   | 5301101   | + | 2.20  | -2652 | 397288    | PDX1    | 5303609   | 5309063   |
| NC_010451.4 | 46401764  | 46402052  | + | 0.88  | 470   | 100519043 | PDZD3   | 46401438  | 46406207  |
| NC_010456.5 | 127500502 | 127500733 | - | -0.71 | 1803  | 100153734 | PDZD8   | 127395842 | 127502421 |
| NC_010457.5 | 118334548 | 118334797 | - | -1.44 | 1213  | 100312978 | PECR    | 118296359 | 118335886 |
| NC_010444.4 | 5959393   | 5959737   | - | 1.46  | 220   | 100519073 | PELI3   | 5950552   | 5959785   |
| NC_010454.4 | 39932119  | 39932407  | + | 1.78  | 583   | 100517306 | PEX12   | 39931680  | 39936632  |
| NC_010454.4 | 39926472  | 39926936  | + | 1.20  | -4976 | 100517306 | PEX12   | 39931680  | 39936632  |
| NC_010446.5 | 59252534  | 59252837  | + | -2.29 | 353   | 100152963 | PEX2    | 59252332  | 59270117  |
| NC_010459.5 | 55155810  | 55156163  | + | 0.88  | 214   | 100144532 | PFDN4   | 55155772  | 55168024  |
| NC_010456.5 | 22779560  | 22779791  | - | -1.35 | 1228  | 106508765 | PGAM5   | 22773135  | 22780904  |
| NC_010461.5 | 62186424  | 62186712  | + | 3.46  | -904  | 407608    | PGK1    | 62187472  | 62210321  |
| NC_010461.5 | 97738365  | 97738653  | + | 2.78  | 3107  | 396946    | PGRMC1  | 97735402  | 97743424  |
| NC_010449.5 | 9341255   | 9341597   | + | 2.37  | -2505 | 100153737 | PHACTR1 | 9343931   | 9666886   |
| NC_010443.5 | 21726323  | 21726611  | - | 1.63  | -3212 | 100524350 | PHACTR2 | 21438744  | 21723255  |
| NC_010448.4 | 85411618  | 85411946  | + | 2.46  | -211  | 100622686 | PHACTR4 | 85411993  | 85529441  |
| NC_010446.5 | 8468880   | 8469168   | - | 1.05  | -715  | 100153657 | PHF20L1 | 8394874   | 8468309   |
| NC_010443.5 | 45216284  | 45216515  | + | -2.35 | -3025 | 110260283 | PHF3    | 45219425  | 45295074  |
| NC_010445.4 | 17656390  | 17656703  | - | 1.68  | 217   | 100310801 | PHKG2   | 17640790  | 17656764  |
| NC_010443.5 | 158860341 | 158860629 | - | 1.46  | 3158  | 100154633 | PHLPP1  | 158642810 | 158863643 |
| NC_010444.4 | 340784    | 341225    | + | 2.27  | -367  | 100512701 | PHRF1   | 341372    | 371699    |
| NC_010446.5 | 106808442 | 106808948 | + | -3.71 | -231  | 100154428 | PHTF1   | 106808926 | 106885954 |

|             |           |           |   |       |       |           |         |           |           |
|-------------|-----------|-----------|---|-------|-------|-----------|---------|-----------|-----------|
| NC_010446.5 | 97917513  | 97917744  | + | -0.80 | -606  | 100156778 | PI4KB   | 97918235  | 97949929  |
| NC_010451.4 | 19945912  | 19946172  | - | 0.46  | 1197  | 100519857 | PICALM  | 19835934  | 19947239  |
| NC_010451.4 | 19944856  | 19945116  | - | -0.54 | 2253  | 100519857 | PICALM  | 19835934  | 19947239  |
| NC_010451.4 | 19945282  | 19945591  | - | -1.35 | 1802  | 100519857 | PICALM  | 19835934  | 19947239  |
| NC_010446.5 | 109031667 | 109031958 | - | 2.27  | 1902  | 102160142 | PIFO    | 109021109 | 109033715 |
| NC_010443.5 | 116517775 | 116518063 | - | 0.78  | 1732  | 100515767 | PIGB    | 116492910 | 116519651 |
| NC_010443.5 | 159318310 | 159318598 | + | 2.29  | 589   | 100522054 | PIGN    | 159317865 | 159417335 |
| NC_010456.5 | 48312827  | 48313115  | - | 3.46  | 4573  | 100153506 | PISD    | 48303459  | 48317544  |
| NC_010454.4 | 47784252  | 47784578  | - | 2.68  | 972   | 100623388 | PITPNA  | 47739631  | 47785387  |
| NC_010445.4 | 98266449  | 98266781  | - | 3.05  | 1924  | 100516968 | PKDCC   | 98258456  | 98268539  |
| NC_010446.5 | 57876418  | 57876706  | - | 2.78  | 2622  | 397408    | PKIA    | 57872114  | 57879184  |
| NC_010446.5 | 127708492 | 127708760 | - | -2.67 | 649   | 100154766 | PKN2    | 127579097 | 127709275 |
| NC_010451.4 | 52302982  | 52303270  | + | 1.20  | 104   | 100525656 | PKNOX2  | 52303022  | 52608505  |
| NC_010451.4 | 128000117 | 128000385 | + | 0.17  | -147  | 100520687 | PLA2G4A | 128000398 | 128164825 |
| NC_010447.5 | 9714120   | 9714408   | + | 2.78  | 410   | 100514711 | PLA2G6  | 9713854   | 9777921   |
| NC_010443.5 | 196177336 | 196177700 | + | 2.56  | 1509  | 100511733 | PLAA    | 196176009 | 196219614 |
| NC_010447.5 | 54259793  | 54260047  | + | -0.93 | 2211  | 397632    | PLCZ1   | 54257709  | 54452557  |
| NC_010446.5 | 41533965  | 41534196  | - | 0.65  | 851   | 110260255 | PLEKHF2 | 41512109  | 41534932  |
| NC_010444.4 | 76404957  | 76405245  | - | 0.88  | 69    | 100514627 | PLEKHJ1 | 76402453  | 76405170  |
| NC_010451.4 | 39950019  | 39950307  | - | 2.20  | -454  | 396570    | PLET1   | 39936355  | 39949709  |
| NC_010443.5 | 203684044 | 203684332 | + | 1.78  | 182   | 397402    | PLIN2   | 203684006 | 203694677 |
| NC_010443.5 | 203685072 | 203685360 | + | 2.05  | 1210  | 397402    | PLIN2   | 203684006 | 203694677 |
| NC_010445.4 | 22548090  | 22548378  | - | 1.05  | 2667  | 396953    | PLK1    | 22537814  | 22550901  |
| NC_010446.5 | 118754810 | 118755098 | - | 2.63  | -2455 | 100158146 | PLPPR4  | 118713987 | 118752499 |
| NC_010455.5 | 86867484  | 86868288  | - | 1.14  | 1683  | 100620055 | PLSCR1  | 86836288  | 86869569  |
| NC_010455.5 | 73102632  | 73102920  | - | 2.46  | -3990 | 100624579 | PLXNA1  | 73054434  | 73098786  |
| NC_010443.5 | 57129792  | 57130163  | + | -2.08 | 1877  | 106508885 | PNRC1   | 57128100  | 57132071  |
| NC_010461.5 | 68577760  | 68578016  | - | 0.46  | 2029  | 100523581 | POF1B   | 68503170  | 68579917  |
| NC_010451.4 | 8906886   | 8907174   | + | 2.46  | 539   | 100626052 | POLD3   | 8906491   | 8956845   |
| NC_010447.5 | 6174899   | 6175187   | + | 1.46  | -3735 | 100525164 | POLDIP3 | 6178778   | 6201940   |
| NC_010443.5 | 179528894 | 179529182 | - | 0.05  | 853   | 100521651 | POLE2   | 179495278 | 179529891 |
| NC_010443.5 | 238193859 | 238194147 | + | 2.05  | -3656 | 100156445 | POLR1E  | 238197659 | 238219475 |
| NC_010457.5 | 59479080  | 59479543  | + | 1.10  | -319  | 100737579 | POLR2D  | 59479631  | 59495975  |
| NC_010447.5 | 9917218   | 9917608   | - | 0.78  | 308   | 100737214 | POLR2F  | 9905359   | 9917721   |

|             |           |           |   |       |       |           |          |           |           |
|-------------|-----------|-----------|---|-------|-------|-----------|----------|-----------|-----------|
| NC_010456.5 | 6521399   | 6521697   | + | -0.12 | 535   | 100154035 | POLR3D   | 6521013   | 6529526   |
| NC_010459.5 | 26719256  | 26719563  | + | 1.20  | 70    | 100738796 | POLR3F   | 26719339  | 26737635  |
| NC_010449.5 | 100391557 | 100391850 | - | 1.46  | 460   | 100155173 | POMT2    | 100350451 | 100392164 |
| NC_010460.4 | 22885304  | 22885535  | + | -0.86 | -288  | 100192443 | POT1     | 22885708  | 22981893  |
| NC_010456.5 | 73166782  | 73167070  | - | 1.61  | 762   | 100155201 | PPA1     | 73132368  | 73167688  |
| NC_010450.4 | 116249396 | 116249684 | + | 2.05  | 9     | 100521105 | PPA2     | 116249531 | 116333847 |
| NC_010459.5 | 62537499  | 62537787  | + | 2.20  | 133   | 110257398 | PPDPF    | 62537510  | 62539012  |
| NC_010450.4 | 71550840  | 71551128  | - | 2.46  | 4993  | 100511942 | PPEF2    | 71519873  | 71555977  |
| NC_010451.4 | 113730852 | 113731140 | + | 1.20  | 3139  | 100512361 | PPFIA4   | 113727857 | 113777772 |
| NC_010451.4 | 113727491 | 113727779 | + | 0.46  | -222  | 100512361 | PPFIA4   | 113727857 | 113777772 |
| NC_010457.5 | 75942601  | 75942832  | + | 1.46  | 2317  | 100155786 | PPIG     | 75940399  | 75979168  |
| NC_010457.5 | 75941498  | 75941982  | + | 0.00  | 1341  | 100155786 | PPIG     | 75940399  | 75979168  |
| NC_010449.5 | 32549965  | 32550253  | - | 0.05  | -2235 | 100524445 | PPIL1    | 32522736  | 32547874  |
| NC_010457.5 | 104583214 | 104583639 | - | 1.31  | 325   | 100156964 | PPIL3    | 104569138 | 104583752 |
| NC_010445.4 | 111748949 | 111749257 | + | -1.44 | 1091  | 100739632 | PPM1G    | 111748012 | 111770868 |
| NC_010449.5 | 23164621  | 23164912  | - | 1.46  | 1104  | 100144450 | PPP1R10  | 23148843  | 23165871  |
| NC_010449.5 | 22634157  | 22634388  | + | -1.12 | 49    | 100141423 | PPP1R11  | 22634223  | 22636987  |
| NC_010447.5 | 101491630 | 101492255 | + | -2.18 | 1660  | 397190    | PPP1R12A | 101490282 | 101639456 |
| NC_010451.4 | 65067202  | 65067490  | - | 0.46  | 1737  | 100512360 | PPP1R15B | 65056495  | 65069083  |
| NC_010454.4 | 22689852  | 22690140  | - | 2.78  | 975   | 100736966 | PPP1R1B  | 22681244  | 22690971  |
| NC_010455.5 | 132487369 | 132488282 | - | 1.19  | 1664  | 100156975 | PPP1R2   | 132460186 | 132489490 |
| NC_010444.4 | 136519094 | 136519499 | - | 3.27  | 3333  | 397656    | PPP2CA   | 136497780 | 136522630 |
| NC_010451.4 | 131074369 | 131074731 | - | 0.46  | 1253  | 100101925 | PPP2R5A  | 131003903 | 131075803 |
| NC_010445.4 | 85652914  | 85653145  | + | -0.93 | 2965  | 100512224 | PPP4R3B  | 85650064  | 85708808  |
| NC_010451.4 | 56750179  | 56750410  | - | -2.54 | -807  | 100517360 | PRDM10   | 56657270  | 56749487  |
| NC_010447.5 | 12639527  | 12639815  | + | 1.46  | 1281  | 100155716 | PRDM4    | 12638390  | 12668890  |
| NC_010450.4 | 103193285 | 103193595 | + | 1.46  | -356  | 100522885 | PRDM5    | 103193796 | 103383955 |
| NC_010450.4 | 137615161 | 137615449 | - | 1.88  | -3916 | 100514243 | PRDM8    | 137604805 | 137611389 |
| NC_010448.4 | 165844558 | 165844846 | + | 2.20  | -2688 | 100512476 | PRDX1    | 165847390 | 165859918 |
| NC_010447.5 | 15045030  | 15045261  | - | -0.86 | 4530  | 414426    | PRKAG1   | 15033051  | 15049676  |
| NC_010450.4 | 136756249 | 136756564 | + | 2.27  | 1092  | 100512796 | PRKG2    | 136755314 | 136854589 |
| NC_010457.5 | 84156435  | 84156764  | - | 3.05  | -3    | 100155653 | PRKRA    | 84134273  | 84156596  |
| NC_010457.5 | 84155453  | 84155741  | - | 4.05  | 999   | 100155653 | PRKRA    | 84134273  | 84156596  |
| NC_010445.4 | 73707393  | 73707681  | - | 2.78  | 3873  | 100737690 | PROKR1   | 73689583  | 73711410  |



|             |           |           |   |       |       |           |         |           |           |
|-------------|-----------|-----------|---|-------|-------|-----------|---------|-----------|-----------|
| NC_010446.5 | 111345745 | 111346135 | - | 2.05  | 1565  | 100154667 | PRPF38B | 111338988 | 111347505 |
| NC_010457.5 | 60440166  | 60440540  | - | 1.68  | 125   | 100157937 | PRPF40A | 60391451  | 60440478  |
| NC_010454.4 | 24209303  | 24209711  | - | 2.78  | -775  | 100626612 | PRR15L  | 24203811  | 24208732  |
| NC_010444.4 | 77649461  | 77650003  | + | 2.46  | -9    | 102159474 | PRSS57  | 77649741  | 77657627  |
| NC_010456.5 | 74769486  | 74769774  | - | 2.88  | 33    | 100153167 | PSAP    | 74734185  | 74769663  |
| NC_010459.5 | 12649310  | 12649598  | + | 2.46  | -1229 | 100623956 | PSD3    | 12650683  | 13267176  |
| NC_010449.5 | 96480118  | 96480507  | + | 2.31  | 2133  | 780411    | PSEN1   | 96478179  | 96567884  |
| NC_010444.4 | 44740606  | 44741022  | + | 2.88  | 712   | 100516779 | PSMA1   | 44740102  | 44755296  |
| NC_010443.5 | 187342686 | 187342974 | + | 2.42  | 599   | 100154408 | PSMA3   | 187342231 | 187371149 |
| NC_010448.4 | 91829689  | 91829977  | - | 1.46  | 109   | 100622444 | PSMB2   | 91792055  | 91829942  |
| NC_010451.4 | 103362041 | 103362607 | + | 0.16  | -360  | 100514865 | PSMC2   | 103362684 | 103376048 |
| NC_010448.4 | 48407413  | 48407701  | + | 3.46  | 1320  | 110260986 | PSMC4   | 48406237  | 48414470  |
| NC_010457.5 | 131807840 | 131808128 | + | 4.05  | 390   | 100153828 | PSMD1   | 131807594 | 131912194 |
| NC_010448.4 | 17046870  | 17047370  | + | 2.73  | -300  | 100626274 | PSMD7   | 17047420  | 17057170  |
| NC_010443.5 | 253090985 | 253091713 | - | 2.74  | 1292  | 768100    | PTBP3   | 252986716 | 253092641 |
| NC_010458.4 | 48604438  | 48605104  | + | 1.34  | -243  | 100519399 | PTCD2   | 48605014  | 48635954  |
| NC_010458.4 | 48601053  | 48601492  | + | 2.78  | -3741 | 100519399 | PTCD2   | 48605014  | 48635954  |
| NC_010452.4 | 38938432  | 38938845  | - | 2.46  | -1155 | 100620580 | PTCHD3  | 38927543  | 38937483  |
| NC_010456.5 | 99932520  | 99932886  | + | 1.46  | 2647  | 100156264 | PTEN    | 99930056  | 100021619 |
| NC_010456.5 | 99930470  | 99930701  | + | 0.29  | 529   | 100156264 | PTEN    | 99930056  | 100021619 |
| NC_010458.4 | 25674454  | 25674893  | + | 2.46  | 3841  | 100625072 | PTGER4  | 25670832  | 25686556  |
| NC_010454.4 | 19909200  | 19909431  | + | -0.71 | 278   | 110255999 | PTGES3L | 19909037  | 19915852  |
| NC_010451.4 | 102561794 | 102562039 | - | -1.71 | 2052  | 100625763 | PTPN12  | 102480914 | 102563969 |
| NC_010451.4 | 102562365 | 102562846 | - | 0.73  | 1363  | 100625763 | PTPN12  | 102480914 | 102563969 |
| NC_010449.5 | 110453855 | 110454143 | - | 2.78  | -179  | 100152076 | PTPN21  | 110374915 | 110453820 |
| NC_010449.5 | 110452385 | 110452773 | - | 0.14  | 1241  | 100152076 | PTPN21  | 110374915 | 110453820 |
| NC_010452.4 | 21484181  | 21484469  | + | 2.46  | 1341  | 100522631 | PTPRC   | 21482984  | 21601627  |
| NC_010443.5 | 34695465  | 34695803  | + | -1.86 | 2262  | 100153609 | PTPRK   | 34693372  | 35258699  |
| NC_010447.5 | 57260193  | 57260491  | - | 1.14  | 3053  | 100524563 | PTPRO   | 57021819  | 57263395  |
| NC_010454.4 | 35932355  | 35932753  | - | 2.95  | 672   | 100519562 | PTRH2   | 35924030  | 35933226  |
| NC_010458.4 | 63109219  | 63109450  | - | -1.76 | 3005  | 397015    | PTTG1   | 63104698  | 63112340  |
| NC_010448.4 | 87686212  | 87686500  | - | 2.37  | 1127  | 100517038 | PUM1    | 87546388  | 87687483  |
| NC_010451.4 | 53028679  | 53028967  | - | 1.78  | -302  | 100512802 | PUS3    | 53018878  | 53028521  |
| NC_010447.5 | 74836332  | 74836573  | - | -0.54 | -1921 | 100155187 | PUS7L   | 74805634  | 74834531  |

|             |           |           |   |       |       |           |           |           |           |
|-------------|-----------|-----------|---|-------|-------|-----------|-----------|-----------|-----------|
| NC_010448.4 | 63593874  | 63594162  | + | 2.46  | 479   | 100524091 | PUSL1     | 63593539  | 63596921  |
| NC_010458.4 | 63409425  | 63409713  | + | 3.27  | -329  | 100518878 | PWWP2A    | 63409898  | 63449997  |
| NC_010452.4 | 13845545  | 13845833  | - | 2.78  | 211   | 100524702 | PYCR2     | 13841755  | 13845900  |
| NC_010443.5 | 4880196   | 4880513   | - | 0.46  | 3031  | 492277    | QKI       | 4732691   | 4883386   |
| NC_010445.4 | 102823112 | 102823400 | - | 2.20  | -166  | 397424    | QPCT      | 102795199 | 102823090 |
| NC_010455.5 | 31713202  | 31713684  | - | 3.78  | 1080  | 100525663 | QRICH1    | 31663812  | 31714523  |
| NC_010447.5 | 22688317  | 22688548  | - | -2.71 | 1493  | 100627213 | R3HDM2    | 22558645  | 22689926  |
| NC_010445.4 | 112924210 | 112924541 | - | 3.05  | -187  | 100526104 | RAB10     | 112842190 | 112924188 |
| NC_010445.4 | 112922951 | 112923245 | - | 1.05  | 1090  | 100526104 | RAB10     | 112842190 | 112924188 |
| NC_010445.4 | 112921705 | 112922209 | - | 0.10  | 2231  | 100526104 | RAB10     | 112842190 | 112924188 |
| NC_010443.5 | 163859248 | 163859650 | + | 2.46  | 1195  | 595117    | RAB11A    | 163858254 | 163887741 |
| NC_010444.4 | 70893406  | 70893694  | - | 1.20  | 2619  | 100513782 | RAB11B    | 70884457  | 70896169  |
| NC_010444.4 | 70895189  | 70895635  | - | 0.68  | 757   | 100513782 | RAB11B    | 70884457  | 70896169  |
| NC_010457.5 | 48528974  | 48529205  | + | -2.35 | -2168 | 100625212 | RAB11FIP1 | 48531258  | 48561408  |
| NC_010448.4 | 99242542  | 99242830  | - | 2.46  | 1941  | 110261168 | RAB12     | 99216225  | 99244627  |
| NC_010443.5 | 261255801 | 261256097 | - | 0.78  | 964   | 595112    | RAB14     | 261228112 | 261256913 |
| NC_010456.5 | 40140059  | 40140406  | - | 3.78  | 1028  | 100151805 | RAB35     | 40124318  | 40141261  |
| NC_010455.5 | 6906192   | 6906505   | + | -2.12 | 1046  | 100144499 | RAB5A     | 6905302   | 6940165   |
| NC_010454.4 | 20613978  | 20614327  | + | 0.78  | 161   | 100523862 | RAB5C     | 20613991  | 20635952  |
| NC_010451.4 | 116960797 | 116961299 | + | 1.88  | 1884  | 100519968 | RABGAP1L  | 116959164 | 117060057 |
| NC_010452.4 | 24866708  | 24867201  | - | 2.05  | 186   | 100511035 | RABIF     | 24859382  | 24867141  |
| NC_010458.4 | 47500127  | 47500559  | + | 2.20  | 674   | 100515763 | RAD17     | 47499669  | 47529703  |
| NC_010455.5 | 65358954  | 65359242  | - | 0.61  | 408   | 100217383 | RAD18     | 65261270  | 65359506  |
| NC_010443.5 | 248450097 | 248450328 | + | -0.35 | 2221  | 100153668 | RAD23B    | 248447991 | 248493651 |
| NC_010449.5 | 91592044  | 91592467  | + | 1.46  | -157  | 100519785 | RAD51B    | 91592413  | 91812676  |
| NC_010454.4 | 60771027  | 60771443  | - | 2.68  | -3390 | 110256137 | RAI1      | 60751159  | 60767845  |
| NC_010448.4 | 98597442  | 98597853  | - | 2.14  | 1297  | 100519155 | RALBP1    | 98550925  | 98598945  |
| NC_010456.5 | 24316347  | 24316600  | - | -2.54 | 1550  | 397655    | RAN       | 24312810  | 24318024  |
| NC_010449.5 | 10055771  | 10056002  | - | -0.76 | 1870  | 100153339 | RANBP9    | 9976094   | 10057757  |
| NC_010449.5 | 10057665  | 10057953  | - | 3.05  | -52   | 100153339 | RANBP9    | 9976094   | 10057757  |
| NC_010454.4 | 53484947  | 53485178  | + | 0.65  | 478   | 100628074 | RANGRF    | 53484584  | 53486716  |
| NC_010447.5 | 32912792  | 32913059  | + | -1.71 | 2744  | 100152555 | RAP1B     | 32910181  | 32961972  |
| NC_010444.4 | 133950313 | 133950552 | - | -2.27 | 986   | 100521255 | RAPGEF6   | 133708265 | 133951419 |
| NC_010450.4 | 69829083  | 69829649  | - | 1.82  | 2792  | 100525351 | RASSF6    | 69773526  | 69832158  |

|                |           |           |   |       |       |           |         |           |           |
|----------------|-----------|-----------|---|-------|-------|-----------|---------|-----------|-----------|
| NC_010453.5    | 19316283  | 19316515  | - | -1.35 | 1236  | 100151828 | RB1     | 19186754  | 19317635  |
| NC_010456.5    | 38085443  | 38085731  | + | 1.20  | 3545  | 100156794 | RBM19   | 38082042  | 38202548  |
| NC_010449.5    | 13122360  | 13122684  | + | -2.29 | -3996 | 100156013 | RBM24   | 13126518  | 13139504  |
| NC_010461.5    | 87574465  | 87575034  | - | 0.14  | 368   | 100516772 | RBM41   | 87512887  | 87575118  |
| NC_010455.5    | 14973733  | 14973964  | + | -2.12 | 4920  | 100739397 | RBMS3   | 14968928  | 16458470  |
| NC_010457.5    | 54724038  | 54724402  | - | 3.27  | 289   | 100514545 | RBPMS   | 54538585  | 54724509  |
| NC_010447.5    | 7514961   | 7515249   | - | 1.88  | 283   | 110260638 | RBX1    | 7500492   | 7515388   |
| NW_018084979.1 | 1332584   | 1332872   | + | 2.56  | 1901  | 100155804 | RCOR1   | 1330827   | 1469644   |
| NC_010448.4    | 59293751  | 59294086  | - | 2.46  | -779  | 110261049 | RDH13   | 59274383  | 59293139  |
| NC_010448.4    | 59293066  | 59293297  | - | 0.88  | -42   | 110261049 | RDH13   | 59274383  | 59293139  |
| NC_010447.5    | 21168612  | 21168900  | + | 2.46  | 1855  | 100517586 | RDH5    | 21166901  | 21170913  |
| NC_010456.5    | 66962563  | 66963021  | + | 0.65  | -3276 | 100158143 | REEP3   | 66966068  | 67071200  |
| NC_010445.4    | 80910929  | 80911301  | - | 3.73  | 1118  | 100525104 | REL     | 80861862  | 80912233  |
| NC_010450.4    | 29185986  | 29186274  | - | 1.20  | 4461  | 100522085 | RELL1   | 29118511  | 29190591  |
| NC_010447.5    | 46031920  | 46032234  | - | 2.10  | -514  | 100514348 | REP15   | 46029302  | 46031563  |
| NC_010447.5    | 54936859  | 54937147  | + | 1.78  | -2381 | 100153016 | RERGL   | 54939384  | 54952059  |
| NC_010458.4    | 5776668   | 5777096   | - | 3.46  | -7    | 100625174 | RETREG1 | 5726501   | 5776875   |
| NC_010445.4    | 59400670  | 59400965  | + | 1.68  | -343  | 100519138 | RETSAT  | 59401161  | 59416829  |
| NC_010445.4    | 25239290  | 25239578  | - | 0.78  | -472  | 100512042 | REXO5   | 25187759  | 25238962  |
| NC_010456.5    | 34641982  | 34642270  | - | 3.46  | 472   | 100153965 | RFC5    | 34630374  | 34642598  |
| NC_010454.4    | 40085815  | 40086103  | + | 1.88  | -671  | 100627054 | RFFL    | 40086630  | 40151034  |
| NC_010451.4    | 118112832 | 118113110 | - | -2.12 | 1297  | 100520856 | RFWD2   | 117913504 | 118114268 |
| NC_010443.5    | 115843975 | 115844348 | + | 2.46  | -46   | 100152054 | RFX7    | 115844208 | 115871951 |
| NC_010443.5    | 13338486  | 13338717  | + | -1.12 | -2399 | 100514020 | RGS17   | 13341001  | 13442058  |
| NC_010456.5    | 46411183  | 46411471  | - | 1.31  | -110  | 100158098 | RHBDD3  | 46403146  | 46411217  |
| NC_010456.5    | 64399720  | 64399951  | - | 0.73  | 47    | 100153330 | RHOBTB1 | 64326461  | 64399883  |
| NC_010447.5    | 3974048   | 3974400   | - | -1.86 | 1800  | 100519482 | RIBC2   | 3966339   | 3976024   |
| NC_010456.5    | 29494927  | 29495215  | + | 2.05  | 111   | 100626388 | RILPL2  | 29494960  | 29522923  |
| NC_010451.4    | 105392899 | 105393280 | + | 2.29  | 236   | 100517297 | RINT1   | 105392853 | 105430198 |
| NC_010455.5    | 162330649 | 162331095 | + | 0.46  | 331   | 110256447 | RIOX2   | 162330541 | 162354420 |
| NC_010455.5    | 205152832 | 205153120 | - | 2.46  | 24    | 100518276 | RIPK4   | 205127239 | 205153000 |
| NC_010446.5    | 94119007  | 94119295  | + | 0.65  | 862   | 100155905 | RIT1    | 94118289  | 94127882  |
| NC_010446.5    | 50344900  | 50345259  | + | 1.68  | 190   | 100156087 | RMDN1   | 50344889  | 50386187  |
| NC_010444.4    | 80247762  | 80248107  | - | 1.88  | -933  | 100510951 | RMND5B  | 80226047  | 80247001  |

|             |           |           |   |       |       |           |          |           |           |
|-------------|-----------|-----------|---|-------|-------|-----------|----------|-----------|-----------|
| NC_010453.5 | 16911744  | 16912063  | - | 2.20  | 51    | 100625239 | RNASEH2B | 16825799  | 16911955  |
| NC_010443.5 | 2146060   | 2146348   | + | 1.78  | -503  | 100157985 | RNASET2  | 2146707   | 2164768   |
| NC_010445.4 | 58162136  | 58162882  | + | -2.56 | 1422  | 100515888 | RNF103   | 58161087  | 58183750  |
| NC_010448.4 | 160910478 | 160911107 | - | 1.84  | 920   | 100736575 | RNF11    | 160875868 | 160911713 |
| NC_010455.5 | 90033992  | 90034576  | + | 0.34  | -300  | 100621829 | RNF13    | 90034584  | 90178421  |
| NC_010444.4 | 48985222  | 48985510  | + | 0.20  | -175  | 100620525 | RNF141   | 48985541  | 49028891  |
| NC_010456.5 | 47947500  | 47947788  | + | 3.05  | 1260  | 100157569 | RNF185   | 47946384  | 47979702  |
| NC_010449.5 | 75831772  | 75832325  | - | 3.14  | -593  | 100516275 | RNF212B  | 75798895  | 75831455  |
| NC_010456.5 | 47360034  | 47360322  | - | 2.46  | -2987 | 100739143 | RNF215   | 47351296  | 47357191  |
| NC_010443.5 | 37909780  | 37910201  | - | 1.36  | 2131  | 100738102 | RNF217   | 37784359  | 37912122  |
| NC_010454.4 | 34694583  | 34694871  | - | 0.88  | 294   | 100517305 | RNF43    | 34631574  | 34695021  |
| NC_010444.4 | 81379421  | 81379709  | + | 2.78  | 610   | 100523538 | RNF44    | 81378955  | 81390227  |
| NC_010443.5 | 57062126  | 57062467  | - | 2.05  | -311  | 100520874 | RNGTT    | 56852864  | 57061985  |
| NC_010456.5 | 100604100 | 100604388 | - | 1.78  | 648   | 100155046 | RNLS     | 100312592 | 100604892 |
| NC_010448.4 | 96362008  | 96362239  | - | -0.54 | 690   | 100621823 | RNMT     | 96338283  | 96362814  |
| NC_010445.4 | 125354215 | 125354661 | + | 2.05  | 1319  | 397445    | ROCK2    | 125353119 | 125493368 |
| NC_010443.5 | 227575148 | 227575379 | + | 0.20  | 1291  | 100739111 | RORB     | 227573972 | 227776806 |
| NC_010443.5 | 44410986  | 44411381  | + | 1.53  | 1305  | 100156931 | ROS1     | 44409878  | 44535784  |
| NC_010443.5 | 44412101  | 44412473  | + | 2.22  | 2409  | 100156931 | ROS1     | 44409878  | 44535784  |
| NC_010447.5 | 78065985  | 78066273  | - | 1.46  | 102   | 100623899 | RPAP3    | 78023796  | 78066231  |
| NC_010443.5 | 99047676  | 99048229  | - | -0.97 | 424   | 100625001 | RPL17    | 99044511  | 99048377  |
| NC_010443.5 | 179476578 | 179476866 | - | 3.05  | 1098  | 396952    | RPL36AL  | 179476638 | 179477820 |
| NC_010455.5 | 71891909  | 71892140  | + | -1.12 | -575  | 397606    | RPN1     | 71892600  | 71908772  |
| NC_010455.5 | 71891131  | 71891419  | + | 0.78  | -1325 | 397606    | RPN1     | 71892600  | 71908772  |
| NC_010456.5 | 102566364 | 102566652 | + | 1.95  | 706   | 100156540 | RPP30    | 102565802 | 102606046 |
| NC_010446.5 | 98734596  | 98734897  | - | 2.24  | -140  | 100620276 | RPRD2    | 98640925  | 98734606  |
| NC_010448.4 | 50010328  | 50010616  | - | 0.88  | -444  | 100518254 | RPS19    | 50003198  | 50010028  |
| NC_010443.5 | 203445998 | 203446254 | + | -2.35 | 1675  | 100038023 | RPS6     | 203444451 | 203447643 |
| NC_010443.5 | 203443367 | 203443736 | + | 0.85  | -899  | 100038023 | RPS6     | 203444451 | 203447643 |
| NC_010445.4 | 7572344   | 7572791   | - | -1.73 | -577  | 100624003 | RRN3     | 7537131   | 7571990   |
| NC_010446.5 | 93362778  | 93363066  | - | 1.46  | 3102  | 100152334 | RRNAD1   | 93358141  | 93366024  |
| NC_010451.4 | 12274131  | 12274419  | - | 0.68  | 3845  | 100217384 | RSF1     | 12121824  | 12278120  |
| NC_010443.5 | 116612105 | 116612698 | + | 2.78  | 66    | 100623328 | RSL24D1  | 116612335 | 116629161 |
| NC_010443.5 | 36070305  | 36070578  | - | -2.03 | -4009 | 100155208 | RSPO3    | 35985985  | 36066432  |

|             |           |           |   |       |       |           |         |           |           |
|-------------|-----------|-----------|---|-------|-------|-----------|---------|-----------|-----------|
| NC_010452.4 | 45079792  | 45080159  | + | -0.12 | 961   | 100524759 | RSU1    | 45079014  | 45289423  |
| NC_010446.5 | 117874600 | 117874888 | - | 2.05  | 886   | 100154102 | RTCA    | 117852776 | 117875630 |
| NC_010447.5 | 12579756  | 12580100  | + | -0.44 | -365  | 733658    | RTCB    | 12580293  | 12605722  |
| NC_010443.5 | 129941929 | 129942217 | - | 0.88  | 772   | 100524183 | RTF1    | 129886798 | 129942845 |
| NC_010445.4 | 68599454  | 68599742  | + | 1.61  | -541  | 100518548 | RTKN    | 68600139  | 68613633  |
| NC_010445.4 | 86178097  | 86178328  | + | -2.86 | -1809 | 100170118 | RTN4    | 86180022  | 86252126  |
| NC_010444.4 | 79020722  | 79020953  | - | 0.05  | -3655 | 100519354 | RUFY1   | 78974361  | 79017182  |
| NC_010456.5 | 71550090  | 71550464  | - | 1.88  | -2540 | 100154292 | RUFY2   | 71497232  | 71547737  |
| NC_010448.4 | 54250892  | 54251233  | + | 2.05  | 556   | 100511637 | RUVBL2  | 54250506  | 54263492  |
| NC_010446.5 | 97260930  | 97261744  | + | 2.01  | -497  | 100515138 | S100A10 | 97261834  | 97272517  |
| NC_010446.5 | 97235809  | 97236097  | + | 1.78  | 2120  | 445534    | S100A11 | 97233833  | 97239081  |
| NC_010454.4 | 26315316  | 26315605  | - | 3.27  | 87    | 102159512 | SAMD14  | 26295159  | 26315548  |
| NC_010449.5 | 100451378 | 100451609 | + | -0.67 | 1935  | 100152746 | SAMD15  | 100449558 | 100463889 |
| NC_010456.5 | 77680300  | 77680611  | + | -0.71 | 1168  | 100151793 | SAMD8   | 77679287  | 77737657  |
| NC_010456.5 | 16680950  | 16681299  | - | 1.78  | 799   | 100620430 | SAP30   | 16674835  | 16681924  |
| NC_010443.5 | 180432462 | 180432757 | - | -0.41 | 1848  | 100156165 | SAV1    | 180404871 | 180434458 |
| NC_010444.4 | 49241109  | 49241397  | + | 2.05  | -1488 | 100521123 | SBF2    | 49242741  | 49691769  |
| NC_010444.4 | 49243462  | 49243693  | + | 0.20  | 836   | 100521123 | SBF2    | 49242741  | 49691769  |
| NC_010448.4 | 54686433  | 54686721  | + | 1.61  | 1240  | 100521729 | SCAF1   | 54685337  | 54700400  |
| NC_010448.4 | 54686796  | 54687084  | + | 1.46  | 1603  | 100521729 | SCAF1   | 54685337  | 54700400  |
| NC_010447.5 | 76875596  | 76875974  | - | 2.05  | 866   | 100525109 | SCAF11  | 76809441  | 76876651  |
| NC_010449.5 | 58673279  | 58673567  | + | 0.20  | 784   | 100154517 | SCAMP2  | 58672639  | 58699145  |
| NC_010452.4 | 15263657  | 15263945  | - | 0.46  | 615   | 100512485 | SCCPDH  | 15205644  | 15264416  |
| NC_010449.5 | 68851345  | 68851647  | - | 2.14  | -441  | 100157840 | SCFD1   | 68742126  | 68851055  |
| NC_010449.5 | 68850978  | 68851294  | - | 1.30  | -81   | 100157840 | SCFD1   | 68742126  | 68851055  |
| NC_010444.4 | 16997     | 17664     | + | 3.18  | -221  | 100517148 | SCGB1C1 | 17552     | 20717     |
| NC_010444.4 | 149119243 | 149119531 | + | 1.68  | -1265 | 100622733 | SCGB3A2 | 149120652 | 149124614 |
| NC_010457.5 | 72916369  | 72916657  | - | 1.20  | -4161 | 100516701 | SCN9A   | 72745706  | 72912352  |
| NC_010446.5 | 825713    | 826001    | + | 2.78  | 932   | 110260417 | SCRIB   | 824925    | 852360    |
| NC_010459.5 | 34561389  | 34561677  | + | 1.78  | 3286  | 100620262 | SCRT2   | 34558247  | 34570434  |
| NC_010448.4 | 87537239  | 87537745  | - | 2.14  | -1803 | 100516859 | SDC3    | 87495041  | 87535689  |
| NC_010452.4 | 13897071  | 13897395  | - | 1.68  | 614   | 100524888 | SDE2    | 13879482  | 13897847  |
| NC_010448.4 | 75676967  | 75677271  | - | 1.05  | 992   | 414412    | SDHB    | 75648362  | 75678111  |
| NC_010444.4 | 136885270 | 136885512 | + | 0.46  | 1516  | 100511986 | SEC24A  | 136883875 | 136952181 |

|                |           |           |   |       |       |           |          |           |           |
|----------------|-----------|-----------|---|-------|-------|-----------|----------|-----------|-----------|
| NC_010444.4    | 136884763 | 136885051 | + | 3.20  | 1032  | 100511986 | SEC24A   | 136883875 | 136952181 |
| NC_010450.4    | 112762665 | 112763077 | - | 1.68  | -1    | 100622653 | SEC24B   | 112670529 | 112762870 |
| NC_010450.4    | 104560806 | 104561094 | + | 0.20  | 227   | 100739491 | SEC24D   | 104560723 | 105005400 |
| NC_010450.4    | 135434868 | 135435099 | + | -0.67 | 2866  | 100511210 | SEC31A   | 135432117 | 135495124 |
| NC_010443.5    | 74077494  | 74077759  | - | -1.35 | 978   | 100152304 | SEC63    | 74003428  | 74078605  |
| NC_010458.4    | 27546800  | 27547096  | - | -2.58 | 915   | 100037964 | SELENOP  | 27537885  | 27547863  |
| NC_010449.5    | 55766716  | 55767004  | + | 4.05  | 1215  | 110261555 | SEMA4B   | 55765645  | 55793982  |
| NC_010455.5    | 133268293 | 133268581 | - | 3.46  | 763   | 100526077 | SENP5    | 133196061 | 133269200 |
| NC_010448.4    | 145188448 | 145188819 | + | 1.14  | 2082  | 100518613 | SERBP1   | 145186551 | 145201781 |
| NC_010443.5    | 40098767  | 40099492  | + | 2.63  | -193  | 102158514 | SERINC1  | 40099323  | 40141552  |
| NC_010455.5    | 106560210 | 106560501 | + | 2.82  | 1029  | 100154352 | SERPINI1 | 106559326 | 106636930 |
| NC_010448.4    | 85327504  | 85327792  | + | 2.78  | 4325  | 100620966 | SESN2    | 85323323  | 85348044  |
| NC_010451.4    | 27277696  | 27278041  | - | 0.53  | 1336  | 100526065 | SESN3    | 27207239  | 27279205  |
| NC_010455.5    | 199588341 | 199588629 | - | 1.46  | 1439  | 100622154 | SETD4    | 199564048 | 199589924 |
| NC_010450.4    | 87479383  | 87479671  | + | 2.46  | 629   | 100626704 | SETD7    | 87478898  | 87527190  |
| NC_010456.5    | 129075010 | 129075429 | - | 1.46  | 578   | 100154966 | SFXN4    | 129047831 | 129075798 |
| NC_010458.4    | 67484171  | 67484463  | - | -2.71 | -2608 | 100240724 | SGCD     | 66447995  | 67481709  |
| NC_010451.4    | 74471077  | 74471509  | - | -0.86 | 2609  | 100240725 | SGCE     | 74402714  | 74473902  |
| NC_010455.5    | 7153605   | 7153905   | - | -0.12 | -553  | 100520101 | SGO1     | 7137891   | 7153202   |
| NC_010444.4    | 72393176  | 72393613  | + | 2.20  | -906  | 100521544 | SH2D3A   | 72394301  | 72406242  |
| NC_010445.4    | 59322796  | 59323084  | - | 0.46  | 4118  | 100520186 | SH2D6    | 59319980  | 59327058  |
| NC_010455.5    | 203046049 | 203046369 | + | 2.88  | -366  | 100626262 | SH3BGR   | 203046575 | 203108638 |
| NC_010455.5    | 203046875 | 203047167 | + | 0.46  | 446   | 100626262 | SH3BGR   | 203046575 | 203108638 |
| NC_010447.5    | 10187815  | 10188117  | - | 1.68  | -83   | 100623659 | SH3BP1   | 10172303  | 10187883  |
| NC_010448.4    | 48809067  | 48809355  | + | 3.78  | -3952 | 110260987 | SHKBP1   | 48813163  | 48826461  |
| NC_010447.5    | 22539414  | 22539702  | + | 1.20  | 3778  | 100626911 | SHMT2    | 22535780  | 22540322  |
| NC_010446.5    | 105779529 | 105779760 | + | -0.86 | -151  | 100156436 | SIKE1    | 105779796 | 105791241 |
| NC_010459.5    | 33612382  | 33612670  | - | 3.46  | -1151 | 494566    | SIRPA    | 33566270  | 33611375  |
| NC_010444.4    | 53791     | 54022     | - | -1.86 | 1122  | 100125971 | SIRT3    | 38465     | 55029     |
| NW_018084979.1 | 3028127   | 3028415   | + | 1.78  | -1511 | 110258343 | SIVA1    | 3029782   | 3034647   |
| NC_010448.4    | 52100528  | 52100816  | - | 2.46  | -1214 | 100626906 | SIX5     | 52095332  | 52099458  |
| NC_010444.4    | 136474240 | 136474599 | - | 0.82  | 1944  | 110259483 | SKP1     | 136458772 | 136476364 |
| NC_010444.4    | 136474875 | 136475106 | - | 0.46  | 1373  | 110259483 | SKP1     | 136458772 | 136476364 |
| NC_010450.4    | 82114815  | 82115086  | + | -0.44 | -107  | 100192449 | SLC10A7  | 82115058  | 82164221  |

|                |           |           |   |       |       |           |          |           |           |
|----------------|-----------|-----------|---|-------|-------|-----------|----------|-----------|-----------|
| NC_010449.5    | 80192295  | 80192572  | + | 0.05  | 2057  | 100156993 | SLC12A6  | 80190376  | 80266330  |
| NC_010444.4    | 10797632  | 10797975  | + | 2.27  | -2123 | 100513135 | SLC15A3  | 10799927  | 10814363  |
| NC_010449.5    | 20487614  | 20487869  | + | -1.95 | -2551 | 106504136 | SLC17A4  | 20490293  | 20521425  |
| NC_010456.5    | 4276294   | 4276628   | - | 2.20  | 2876  | 100154435 | SLC18A1  | 4243564   | 4279337   |
| NC_010443.5    | 30923929  | 30924226  | + | -0.71 | 360   | 100155211 | SLC18B1  | 30923717  | 30956898  |
| NC_010444.4    | 7567486   | 7567846   | - | 1.88  | -1866 | 100520540 | SLC22A12 | 7557822   | 7565800   |
| NC_010449.5    | 2131036   | 2131324   | - | 2.78  | 598   | 100152838 | SLC22A23 | 1988690   | 2131778   |
| NC_010449.5    | 38329662  | 38329950  | + | 2.05  | 1332  | 733693    | SLC22A7  | 38328474  | 38334879  |
| NC_010443.5    | 163626885 | 163627136 | + | -0.35 | 1174  | 102160209 | SLC24A1  | 163625836 | 163662071 |
| NC_010443.5    | 203058082 | 203058329 | + | -1.54 | -1357 | 100625506 | SLC24A2  | 203059563 | 203336442 |
| NC_010454.4    | 51971259  | 51971547  | + | 2.20  | 609   | 397390    | SLC25A11 | 51970794  | 51973668  |
| NC_010447.5    | 85291156  | 85291517  | - | -1.18 | 999   | 100302698 | SLC25A3  | 85284405  | 85292336  |
| NC_010455.5    | 81751880  | 81752307  | + | -0.44 | 1581  | 100513238 | SLC25A36 | 81750512  | 81791869  |
| NC_010444.4    | 115530186 | 115530553 | + | 2.68  | 707   | 100516066 | SLC25A46 | 115529662 | 115555441 |
| NC_010444.4    | 115529115 | 115529408 | + | 1.40  | -400  | 100516066 | SLC25A46 | 115529662 | 115555441 |
| NC_010445.4    | 107422589 | 107422987 | - | 1.61  | 3542  | 100170144 | SLC30A6  | 107387876 | 107426330 |
| NC_010460.4    | 14881373  | 14882004  | + | 1.00  | 1366  | 100525844 | SLC35B4  | 14880322  | 14916406  |
| NC_010443.5    | 186954400 | 186954701 | - | 1.46  | -2258 | 100152395 | SLC35F4  | 186687797 | 186952292 |
| NC_010445.4    | 112296445 | 112296733 | - | 1.46  | 224   | 100513653 | SLC35F6  | 112280654 | 112296813 |
| NC_010457.5    | 99656167  | 99656455  | + | 0.88  | 1321  | 110257100 | SLC39A10 | 99654990  | 99724619  |
| NC_010457.5    | 99656583  | 99656871  | + | 1.46  | 1737  | 110257100 | SLC39A10 | 99654990  | 99724619  |
| NC_010450.4    | 118604442 | 118604673 | + | -2.76 | -294  | 100524695 | SLC39A8  | 118604852 | 118678113 |
| NC_010454.4    | 47838722  | 47839139  | - | 1.53  | 196   | 100623009 | SLC43A2  | 47791911  | 47839127  |
| NC_010454.4    | 47839192  | 47839691  | - | 2.63  | -314  | 100623009 | SLC43A2  | 47791911  | 47839127  |
| NC_010443.5    | 246544765 | 246545053 | + | 0.63  | -3552 | 100152140 | SLC44A1  | 246548461 | 246720968 |
| NC_010443.5    | 163081295 | 163081738 | + | 2.27  | 371   | 100525144 | SLC51B   | 163081145 | 163089491 |
| NW_018084874.1 | 551441    | 551753    | - | 2.88  | 4661  | 100126275 | SLC5A11  | 476405    | 556258    |
| NC_010447.5    | 82976522  | 82976810  | + | 2.05  | 3487  | 100524807 | SLC5A8   | 82973179  | 83088542  |
| NC_010447.5    | 67575982  | 67576270  | - | 3.05  | -2268 | 100512716 | SLC6A12  | 67550286  | 67573858  |
| NC_010448.4    | 28837484  | 28837790  | + | 1.46  | 2840  | 110260947 | SLC7A6   | 28834797  | 28876154  |
| NC_010445.4    | 51745652  | 51745940  | - | 1.88  | 4200  | 396786    | SLC9A4   | 51686001  | 51749996  |
| NC_010456.5    | 114899721 | 114900009 | + | 2.46  | 902   | 100156642 | SLK      | 114898963 | 114957494 |
| NC_010455.5    | 39574841  | 39575110  | + | -1.39 | 3045  | 100514321 | SLMAP    | 39571930  | 39720229  |
| NC_010458.4    | 63121190  | 63121483  | + | 0.65  | 2910  | 100517791 | SLU7     | 63118426  | 63145655  |

|             |           |           |   |       |       |           |          |           |           |
|-------------|-----------|-----------|---|-------|-------|-----------|----------|-----------|-----------|
| NC_010443.5 | 97509854  | 97510085  | - | -0.12 | 1392  | 100155304 | SMAD2    | 97415360  | 97511362  |
| NC_010443.5 | 100576028 | 100576316 | + | 1.20  | 1592  | 397142    | SMAD4    | 100574580 | 100633501 |
| NC_010443.5 | 164656057 | 164656571 | + | 0.68  | 3712  | 100152069 | SMAD6    | 164652602 | 164735084 |
| NC_010443.5 | 98545111  | 98545343  | - | -1.12 | -1305 | 100521305 | SMAD7    | 98512800  | 98543922  |
| NC_010443.5 | 219814677 | 219815151 | - | 0.14  | -1546 | 100157302 | SMARCA2  | 219624820 | 219813368 |
| NC_010443.5 | 219815337 | 219815652 | - | 1.78  | -2126 | 100157302 | SMARCA2  | 219624820 | 219813368 |
| NC_010450.4 | 84222532  | 84222861  | - | 1.56  | 2246  | 100188903 | SMARCA5  | 84184572  | 84224943  |
| NC_010450.4 | 125484538 | 125484925 | - | 1.46  | 3561  | 100515330 | SMARCAD1 | 125410221 | 125488293 |
| NC_010457.5 | 118628310 | 118628705 | + | 1.07  | 773   | 100620418 | SMARCAL1 | 118627734 | 118688005 |
| NC_010447.5 | 6570486   | 6570898   | - | 1.73  | 678   | 100737924 | SMDT1    | 6568430   | 6571370   |
| NC_010459.5 | 11549634  | 11550022  | + | 1.85  | -109  | 100152445 | SMIM19   | 11549937  | 11566898  |
| NC_010458.4 | 47776406  | 47776930  | - | 3.41  | 711   | 100170853 | SMN1     | 47738776  | 47777379  |
| NC_010451.4 | 3328190   | 3328602   | - | 1.20  | 97    | 100518980 | SMPD1    | 3324091   | 3328493   |
| NC_010454.4 | 14367852  | 14368140  | + | 1.29  | -687  | 100627676 | SMURF2   | 14368683  | 14492129  |
| NC_010454.4 | 14369453  | 14369741  | + | 3.05  | 914   | 100627676 | SMURF2   | 14368683  | 14492129  |
| NC_010445.4 | 46930217  | 46930477  | + | -2.12 | 1178  | 100739577 | SNRNP200 | 46929169  | 46960420  |
| NC_010443.5 | 145708315 | 145708603 | + | 0.46  | 1066  | 100156573 | SNRPA1   | 145707393 | 145719287 |
| NC_010448.4 | 106802459 | 106802747 | + | 1.88  | 4402  | 100524872 | SNRPD1   | 106798201 | 106810178 |
| NC_010445.4 | 72199808  | 72200039  | + | -1.12 | 1201  | 100525867 | SNRPG    | 72198722  | 72208053  |
| NC_010448.4 | 17773143  | 17773599  | - | 0.14  | 1179  | 100620497 | SNTB2    | 17674587  | 17774550  |
| NC_010443.5 | 54546022  | 54546358  | - | 3.27  | 1014  | 100156800 | SNX14    | 54460645  | 54547204  |
| NC_010443.5 | 54547771  | 54548125  | - | 3.05  | -744  | 100156800 | SNX14    | 54460645  | 54547204  |
| NC_010443.5 | 74347988  | 74348338  | - | 0.20  | 1572  | 100627262 | SNX3     | 74306450  | 74349735  |
| NC_010443.5 | 152635445 | 152635765 | - | 2.46  | 1040  | 100155619 | SOCS6    | 152593647 | 152636645 |
| NC_010454.4 | 23723003  | 23723340  | - | 1.68  | 253   | 100514187 | SOCS7    | 23687115  | 23723425  |
| NC_010443.5 | 180010947 | 180011235 | - | 2.78  | 3850  | 100156602 | SOS2     | 179907578 | 180014941 |
| NC_010445.4 | 46549500  | 46549738  | + | -1.18 | 2393  | 110260118 | SOWAHC   | 46547226  | 46552659  |
| NC_010457.5 | 79982036  | 79982354  | - | 1.68  | 4119  | 100153372 | SP3      | 79935986  | 79986314  |
| NC_010457.5 | 76899641  | 76899929  | + | 1.29  | -353  | 100621662 | SP5      | 76900138  | 76905024  |
| NC_010454.4 | 27370954  | 27371242  | - | 1.78  | -834  | 100518147 | SPAG9    | 27225377  | 27370264  |
| NC_010445.4 | 107507174 | 107507405 | - | -2.03 | 1625  | 396584    | SPAST    | 107439810 | 107508915 |
| NC_010454.4 | 49610783  | 49611071  | - | 1.24  | -1695 | 100415924 | SPATA22  | 49573050  | 49609232  |
| NC_010443.5 | 217300327 | 217300558 | + | -1.71 | -1595 | 100522592 | SPATA6L  | 217302038 | 217353093 |
| NC_010449.5 | 110307920 | 110308221 | + | 2.78  | -1344 | 100153278 | SPATA7   | 110309415 | 110368370 |



|             |           |           |   |       |       |           |          |           |           |
|-------------|-----------|-----------|---|-------|-------|-----------|----------|-----------|-----------|
| NC_010456.5 | 49333636  | 49333924  | + | 2.46  | 530   | 100519740 | SPECC1L  | 49333250  | 49463965  |
| NC_010448.4 | 75016504  | 75016792  | + | 0.29  | 1083  | 100620266 | SPEN     | 75015565  | 75107468  |
| NC_010443.5 | 126888296 | 126888527 | + | -1.12 | -2058 | 100522412 | SPG11    | 126890470 | 126998014 |
| NC_010448.4 | 438838    | 439126    | - | 0.29  | 224   | 100627469 | SPG7     | 414930    | 439206    |
| NC_010448.4 | 53987105  | 53987393  | + | 2.05  | 4338  | 100738292 | SPHK2    | 53982911  | 53986779  |
| NC_010457.5 | 13207616  | 13208091  | - | 3.85  | -186  | 100156406 | SPOPL    | 13134221  | 13207667  |
| NC_010450.4 | 100860116 | 100860387 | - | -0.44 | 3526  | 100623283 | SPRY1    | 100854941 | 100863778 |
| NC_010453.5 | 52155970  | 52156292  | - | -0.80 | 2635  | 100157266 | SPRY2    | 52153695  | 52158766  |
| NC_010444.4 | 143886468 | 143886894 | - | 1.14  | 4141  | 100512891 | SPRY4    | 143877334 | 143890822 |
| NC_010447.5 | 18338921  | 18339180  | - | -1.61 | -359  | 100514838 | SPRYD3   | 18321006  | 18338691  |
| NC_010453.5 | 17849814  | 17850045  | + | -0.86 | 918   | 100155063 | SPRYD7   | 17849011  | 17870090  |
| NC_010449.5 | 100637768 | 100638071 | - | 2.27  | 1053  | 100158010 | SPTLC2   | 100545360 | 100638973 |
| NC_010449.5 | 100639115 | 100639605 | - | -0.35 | -387  | 100158010 | SPTLC2   | 100545360 | 100638973 |
| NC_010449.5 | 100637367 | 100637715 | - | -1.12 | 1432  | 100158010 | SPTLC2   | 100545360 | 100638973 |
| NC_010449.5 | 65303625  | 65303985  | + | 0.65  | 918   | 100156815 | SPTSSA   | 65302887  | 65325877  |
| NC_010455.5 | 101057990 | 101058267 | - | -0.35 | 432   | 100623291 | SPTSSB   | 101027944 | 101058561 |
| NC_010443.5 | 126118384 | 126118805 | - | 3.46  | 976   | 100154990 | SQOR     | 126078340 | 126119571 |
| NC_010458.4 | 43345775  | 43346262  | - | 1.29  | 233   | 100620947 | SREK1IP1 | 43297364  | 43346252  |
| NC_010455.5 | 65758268  | 65758556  | - | 1.37  | 1480  | 102167373 | SRGAP3   | 65367596  | 65759892  |
| NC_010450.4 | 55724566  | 55724854  | + | 3.05  | -4492 | 100520920 | SRP72    | 55729202  | 55762298  |
| NC_010450.4 | 55728119  | 55728454  | + | 2.24  | -915  | 100520920 | SRP72    | 55729202  | 55762298  |
| NC_010445.4 | 101597105 | 101597397 | + | 0.88  | -2178 | 100518189 | SRSF7    | 101599429 | 101608786 |
| NC_010455.5 | 26109808  | 26110039  | + | -0.54 | 1636  | 100523140 | SS18L2   | 26108287  | 26112625  |
| NC_010454.4 | 46089752  | 46090040  | - | 2.78  | -4176 | 100520864 | SSH2     | 45818103  | 46085720  |
| NC_010444.4 | 13619950  | 13620238  | + | 3.46  | 428   | 100624907 | SSRP1    | 13619666  | 13629233  |
| NC_010445.4 | 58861974  | 58862205  | + | 1.73  | -905  | 100625751 | ST3GAL5  | 58862995  | 58919544  |
| NC_010447.5 | 51209012  | 51209345  | + | 2.05  | -2133 | 100625270 | ST8SIA1  | 51211312  | 51364226  |
| NC_010452.4 | 43947644  | 43947949  | + | -1.71 | 806   | 100523271 | STAM     | 43946990  | 44016064  |
| NC_010457.5 | 118616    | 118904    | + | 3.78  | 3462  | 100157042 | STAM2    | 115298    | 168659    |
| NC_010451.4 | 108631544 | 108631942 | + | 0.88  | 504   | 100529117 | STARD3NL | 108631239 | 108675617 |
| NC_010445.4 | 46993414  | 46993702  | + | 1.73  | 850   | 100525865 | STARD7   | 46992708  | 47017668  |
| NC_010445.4 | 46992123  | 46992488  | + | 2.78  | -402  | 100525865 | STARD7   | 46992708  | 47017668  |
| NC_010448.4 | 164199358 | 164199589 | + | -0.44 | 1947  | 100522443 | STIL     | 164197526 | 164266615 |
| NC_010448.4 | 164197271 | 164197884 | + | 2.60  | 51    | 100522443 | STIL     | 164197526 | 164266615 |

|             |           |           |   |       |       |           |         |           |           |
|-------------|-----------|-----------|---|-------|-------|-----------|---------|-----------|-----------|
| NC_010457.5 | 121604004 | 121604329 | + | 2.68  | 91    | 110256991 | STK11IP | 121604075 | 121619066 |
| NC_010446.5 | 38012447  | 38012678  | + | -2.35 | 760   | 100524741 | STK3    | 38011802  | 38306777  |
| NC_010448.4 | 92482851  | 92483407  | - | 2.05  | 1234  | 100625215 | STK40   | 92441231  | 92484363  |
| NC_010457.5 | 105056941 | 105057229 | + | 2.20  | 1838  | 100511661 | STRADB  | 105055247 | 105083429 |
| NC_010451.4 | 52726264  | 52726515  | + | 0.24  | -404  | 100511525 | STT3A   | 52726794  | 52754671  |
| NC_010455.5 | 17535549  | 17535837  | + | -1.08 | 3352  | 100526009 | STT3B   | 17532341  | 17635039  |
| NC_010444.4 | 11740399  | 11740630  | - | -0.27 | -668  | 100520886 | STX3    | 11694791  | 11739846  |
| NC_010446.5 | 111293695 | 111293983 | - | 1.05  | 228   | 100519481 | STXBP3  | 111234154 | 111294067 |
| NC_010443.5 | 18511580  | 18511811  | - | -2.12 | 1054  | 100152912 | STXBP5  | 18343826  | 18512750  |
| NC_010443.5 | 182358058 | 182358488 | + | 0.88  | 676   | 100517509 | STYX    | 182357597 | 182407790 |
| NC_010445.4 | 60142430  | 60142782  | + | 1.68  | 197   | 399539    | SUCLG1  | 60142409  | 60177497  |
| NC_010455.5 | 49090280  | 49090579  | - | 1.46  | 91    | 397026    | SUCLG2  | 48824366  | 49090521  |
| NC_010455.5 | 92114425  | 92114656  | + | 1.46  | -2269 | 100739158 | SUCNR1  | 92116810  | 92130683  |
| NC_010444.4 | 58574579  | 58574886  | + | 1.46  | 298   | 110259310 | SUGP1   | 58574434  | 58615054  |
| NC_010453.5 | 12865119  | 12865532  | - | 2.78  | -1143 | 100739486 | SUPT20H | 12825932  | 12864182  |
| NC_010443.5 | 272987933 | 272988221 | - | 3.78  | 606   | 100623620 | SURF4   | 272975164 | 272988683 |
| NC_010446.5 | 130701119 | 130701407 | + | 2.20  | -1077 | 100154622 | SYDE2   | 130702340 | 130749742 |
| NC_010443.5 | 54597274  | 54597562  | - | 0.46  | 157   | 100154370 | SYNCRIP | 54563112  | 54597575  |
| NC_010455.5 | 196329330 | 196329618 | - | 3.37  | 1037  | 100525664 | SYNJ1   | 196230101 | 196330511 |
| NC_010454.4 | 39070135  | 39070440  | - | 2.05  | -445  | 100624012 | SYNRG   | 38974567  | 39069842  |
| NC_010451.4 | 105981843 | 105982074 | - | -0.93 | 3213  | 100518030 | SYPL1   | 105952898 | 105985172 |
| NC_010459.5 | 47686711  | 47686999  | + | 1.88  | 671   | 102162899 | SYS1    | 47686184  | 47694045  |
| NC_010443.5 | 16615606  | 16615894  | - | 0.20  | -3871 | 100156182 | TAB2    | 16533364  | 16611879  |
| NC_010451.4 | 77196189  | 77196420  | + | 1.24  | -1104 | 100525179 | TAC1    | 77197409  | 77206529  |
| NC_010450.4 | 117661443 | 117661731 | + | 0.88  | -535  | 100521983 | TACR3   | 117662122 | 117718317 |
| NC_010451.4 | 3144127   | 3144724   | + | 2.27  | 163   | 414401    | TAF10   | 3144262   | 3145702   |
| NC_010452.4 | 63573760  | 63574012  | - | -0.12 | 2514  | 100620508 | TAF3    | 63422184  | 63576400  |
| NC_010456.5 | 114304114 | 114304379 | + | 2.14  | -316  | 100152210 | TAF5    | 114304563 | 114321624 |
| NC_010444.4 | 9003397   | 9003685   | - | 1.20  | -3551 | 100620136 | TAF6L   | 8983823   | 8999990   |
| NC_010446.5 | 90566767  | 90567055  | + | 1.88  | 639   | 100515893 | TAGLN2  | 90566272  | 90574762  |
| NC_010443.5 | 246929523 | 246929811 | + | 3.46  | -3308 | 100154895 | TAL2    | 246932975 | 246944722 |
| NC_010454.4 | 45598184  | 45598415  | + | -0.27 | 1232  | 100622172 | TAOK1   | 45597067  | 45750117  |
| NC_010456.5 | 34329484  | 34329772  | + | 4.05  | -1634 | 100154763 | TAOK3   | 34331262  | 34514234  |
| NC_010449.5 | 29672368  | 29672656  | - | 2.78  | 941   | 100155428 | TAPBP   | 29663491  | 29673453  |

|             |           |           |   |       |       |           |         |           |           |
|-------------|-----------|-----------|---|-------|-------|-----------|---------|-----------|-----------|
| NC_010458.4 | 19454400  | 19454995  | + | 2.20  | -596  | 100526191 | TARS    | 19455294  | 19486735  |
| NC_010460.4 | 44906919  | 44907207  | - | 2.20  | 3202  | 100516165 | TAX1BP1 | 44827908  | 44910265  |
| NC_010455.5 | 4606010   | 4606257   | - | -1.35 | 2549  | 100626058 | TBC1D5  | 4191544   | 4608683   |
| NC_010447.5 | 28881072  | 28881674  | + | -0.98 | 1163  | 100125828 | TBK1    | 28880210  | 28929964  |
| NC_010455.5 | 115486039 | 115486326 | - | -0.37 | 932   | 100522831 | TBL1XR1 | 115312445 | 115487115 |
| NC_010455.5 | 115486796 | 115487059 | - | -0.18 | 187   | 100522831 | TBL1XR1 | 115312445 | 115487115 |
| NC_010445.4 | 39995712  | 39996000  | - | 1.46  | -257  | 100623969 | TBL3    | 39989739  | 39995599  |
| NC_010460.4 | 9886455   | 9886743   | - | 3.05  | 100   | 397112    | TBXAS1  | 9717291   | 9886699   |
| NC_010455.5 | 27647953  | 27648305  | + | 1.88  | 59    | 100627345 | TCAIM   | 27648070  | 27703489  |
| NC_010444.4 | 147790141 | 147790530 | + | 2.73  | 1110  | 100621703 | TCERG1  | 147789225 | 147852461 |
| NC_010456.5 | 47496428  | 47496716  | + | 2.20  | 318   | 100152846 | TCN2    | 47496254  | 47515966  |
| NC_010444.4 | 27903245  | 27903476  | - | -1.08 | -194  | 100621866 | TCP11L1 | 27854394  | 27903166  |
| NC_010449.5 | 111769451 | 111769739 | + | 2.20  | 2044  | 100153247 | TDP1    | 111767551 | 111815292 |
| NC_010456.5 | 124524622 | 124524901 | + | -1.54 | -1251 | 100157555 | TDRD1   | 124526013 | 124575166 |
| NC_010446.5 | 62833423  | 62833711  | - | 2.05  | -2108 | 100516798 | TERF1   | 62797244  | 62831459  |
| NC_010460.4 | 29934696  | 29935116  | - | -1.56 | 1342  | 100125376 | TES     | 29895878  | 29936248  |
| NC_010454.4 | 714875    | 715106    | + | -0.93 | 1811  | 100624315 | TEX19   | 713179    | 715704    |
| NC_010455.5 | 33893513  | 33893864  | + | -0.35 | 410   | 102161929 | TEX264  | 33893278  | 33924175  |
| NC_010455.5 | 74864142  | 74864407  | + | -1.93 | 1772  | 396845    | TF      | 74862502  | 74907059  |
| NC_010449.5 | 44641911  | 44642203  | + | 4.05  | 1776  | 100155785 | TFAP2D  | 44640281  | 44702561  |
| NC_010443.5 | 128194239 | 128194506 | + | -0.12 | 2725  | 100158178 | TGM5    | 128191647 | 128217249 |
| NC_010445.4 | 96872364  | 96872652  | + | 2.05  | 330   | 100516259 | THADA   | 96872178  | 97197051  |
| NC_010459.5 | 11771897  | 11772216  | - | 1.46  | 1264  | 100621925 | THAP1   | 11765383  | 11773321  |
| NC_010448.4 | 28465723  | 28466190  | + | 3.27  | 498   | 100520959 | THAP11  | 28465458  | 28466387  |
| NC_010447.5 | 35671794  | 35672025  | + | -1.27 | 629   | 100152778 | THAP2   | 35671280  | 35687298  |
| NC_010456.5 | 50594723  | 50595011  | - | 3.46  | -1089 | 100526013 | THAP7   | 50591412  | 50593778  |
| NC_010458.4 | 65609887  | 65610175  | - | 2.46  | 588   | 100521164 | THG1L   | 65602637  | 65610619  |
| NC_010458.4 | 65610243  | 65610670  | - | 1.46  | 162   | 100521164 | THG1L   | 65602637  | 65610619  |
| NC_010445.4 | 100556581 | 100556869 | + | 0.88  | -443  | 100517336 | THUMPD2 | 100557168 | 100597664 |
| NC_010456.5 | 129467704 | 129468021 | - | 3.46  | -790  | 100158186 | TIAL1   | 129441210 | 129467072 |
| NC_010450.4 | 110378281 | 110378569 | + | 1.88  | 608   | 100513485 | TIFA    | 110377817 | 110394190 |
| NC_010444.4 | 76147080  | 76147368  | + | 1.05  | 278   | 100620885 | TIMM13  | 76146946  | 76148163  |
| NC_010455.5 | 140757813 | 140758260 | - | 1.46  | 661   | 110256419 | TIMMDC1 | 140728559 | 140758698 |
| NC_010443.5 | 164369168 | 164369399 | - | -0.86 | -24   | 100153268 | TIPIN   | 164349196 | 164369259 |

|             |           |           |   |       |       |           |          |           |           |
|-------------|-----------|-----------|---|-------|-------|-----------|----------|-----------|-----------|
| NC_010446.5 | 82794016  | 82794620  | - | 3.46  | 84    | 100155988 | TIPRL    | 82759309  | 82794402  |
| NC_010454.4 | 47914529  | 47914817  | - | 2.46  | 3582  | 110256072 | TLCD2    | 47904150  | 47918255  |
| NC_010443.5 | 236452747 | 236452978 | - | -1.12 | -1884 | 100157220 | TLN1     | 236416041 | 236450978 |
| NC_010457.5 | 47601469  | 47602023  | + | 0.88  | -194  | 100154457 | TM2D2    | 47601940  | 47611802  |
| NC_010455.5 | 89703966  | 89704350  | + | 0.32  | 2987  | 100522400 | TM4SF4   | 89701171  | 89730488  |
| NC_010447.5 | 15675277  | 15675572  | + | -1.12 | 1217  | 396907    | TMBIM6   | 15674207  | 15692765  |
| NC_010446.5 | 84966499  | 84966730  | + | -1.12 | 4702  | 100151809 | TMCO1    | 84961912  | 85011139  |
| NC_010444.4 | 69578789  | 69579077  | - | 3.37  | -2512 | 100627642 | TMED1    | 69573128  | 69576421  |
| NC_010456.5 | 29397887  | 29398118  | - | 0.88  | 2451  | 100625917 | TMED2    | 29390903  | 29400454  |
| NC_010443.5 | 242214143 | 242214464 | + | 2.46  | -651  | 102166244 | TMEFF1   | 242214955 | 242309878 |
| NC_010454.4 | 19755038  | 19755423  | - | 3.05  | 291   | 100624959 | TMEM106A | 19747352  | 19755522  |
| NC_010444.4 | 10836780  | 10837088  | - | 1.46  | 190   | 100511116 | TMEM109  | 10828644  | 10837124  |
| NC_010451.4 | 19544826  | 19545114  | + | 0.46  | -2694 | 100626990 | TMEM126B | 19547664  | 19555247  |
| NC_010460.4 | 6973648   | 6973880   | - | -2.35 | 364   | 100521303 | TMEM139  | 6970887   | 6974128   |
| NC_010450.4 | 54753502  | 54753844  | + | 1.46  | 2103  | 100523623 | TMEM165  | 54751570  | 54796352  |
| NC_010447.5 | 35691629  | 35691917  | + | 2.46  | -224  | 100519775 | TMEM19   | 35691997  | 35717916  |
| NC_010447.5 | 35693014  | 35693388  | + | 3.46  | 1204  | 100519775 | TMEM19   | 35691997  | 35717916  |
| NC_010450.4 | 43960160  | 43960448  | + | 2.46  | -404  | 100512847 | TMEM192  | 43960708  | 43994286  |
| NC_010448.4 | 86037192  | 86037423  | - | -2.71 | -3960 | 100515438 | TMEM200B | 86027778  | 86033347  |
| NC_010448.4 | 69973877  | 69974165  | + | 3.05  | 643   | 100517949 | TMEM201  | 69973378  | 69998548  |
| NC_010460.4 | 18615942  | 18616173  | + | -0.12 | 799   | 100516476 | TMEM209  | 18615258  | 18644708  |
| NC_010460.4 | 23526526  | 23526757  | + | -0.86 | -4856 | 100524656 | TMEM229A | 23531498  | 23533619  |
| NC_010459.5 | 14135412  | 14135643  | - | -1.35 | 878   | 100625411 | TMEM230  | 14125728  | 14136406  |
| NC_010444.4 | 115523726 | 115524014 | - | 2.05  | -3717 | 100515882 | TMEM232  | 115387770 | 115520153 |
| NC_010447.5 | 13396105  | 13396499  | - | 1.73  | 1110  | 100620181 | TMEM263  | 13379490  | 13397412  |
| NC_010447.5 | 13397798  | 13398086  | - | 2.78  | -530  | 100620181 | TMEM263  | 13379490  | 13397412  |
| NC_010443.5 | 90634441  | 90634672  | + | -1.54 | -4714 | 100154255 | TMEM30A  | 90639271  | 90688004  |
| NC_010443.5 | 246973737 | 246974029 | + | 0.20  | 436   | 100153669 | TMEM38B  | 246973447 | 247024019 |
| NC_010455.5 | 140798003 | 140798294 | + | 0.56  | 1050  | 100151958 | TMEM39A  | 140797098 | 140830732 |
| NC_010451.4 | 224678    | 225287    | + | 1.11  | 1005  | 100519436 | TMEM41B  | 223977    | 249813    |
| NC_010448.4 | 82860995  | 82861283  | + | 2.20  | -654  | 100626872 | TMEM50A  | 82861793  | 82879061  |
| NC_010448.4 | 158262090 | 158262416 | + | 1.73  | 317   | 733610    | TMEM59   | 158261936 | 158290465 |
| NC_010443.5 | 119946651 | 119946962 | - | 3.37  | 1988  | 397556    | TMOD3    | 119864878 | 119948795 |
| NC_010454.4 | 19023801  | 19024418  | - | 2.29  | -101  | 100514791 | TMUB2    | 19019641  | 19024008  |

|                |           |           |   |       |       |           |           |           |           |
|----------------|-----------|-----------|---|-------|-------|-----------|-----------|-----------|-----------|
| NC_010443.5    | 159187020 | 159187425 | - | 1.05  | 253   | 100521706 | TNFRSF11A | 159128039 | 159187476 |
| NC_010443.5    | 159189481 | 159189879 | - | 3.46  | -2204 | 100521706 | TNFRSF11A | 159128039 | 159187476 |
| NC_010447.5    | 64316881  | 64317169  | + | 2.46  | -2324 | 397020    | TNFRSF1A  | 64319349  | 64331876  |
| NC_010447.5    | 64320756  | 64321044  | + | 1.88  | 1551  | 397020    | TNFRSF1A  | 64319349  | 64331876  |
| NC_010444.4    | 1303087   | 1303572   | + | 2.46  | 3966  | 414906    | TNNT3     | 1299363   | 1316474   |
| NC_010460.4    | 19573638  | 19573869  | + | -1.12 | 1198  | 100515455 | TNPO3     | 19572555  | 19673165  |
| NC_010445.4    | 3993537   | 3993829   | - | 3.05  | 2515  | 100515017 | TNRC18    | 3901710   | 3996198   |
| NW_018084874.1 | 688266    | 688497    | - | 0.46  | 919   | 110258158 | TNRC6A    | 578944    | 689301    |
| NC_010447.5    | 7085890   | 7086183   | + | 2.46  | -360  | 110260627 | TOB2      | 7086397   | 7098643   |
| NC_010456.5    | 56113852  | 56114372  | + | 2.56  | 1025  | 100152814 | TOMM20    | 56113087  | 56127686  |
| NC_010449.5    | 36977332  | 36977563  | + | -1.71 | 969   | 106504412 | TOMM6     | 36976478  | 36976878  |
| NC_010455.5    | 158578406 | 158578673 | + | -1.44 | 1513  | 100523641 | TOMM70    | 158577026 | 158629878 |
| NC_010459.5    | 43711478  | 43711709  | + | -2.71 | 1323  | 100518587 | TOP1      | 43710270  | 43799700  |
| NC_010454.4    | 60444499  | 60444787  | + | 2.78  | 460   | 110256129 | TOP3A     | 60444183  | 60468968  |
| NC_010446.5    | 73832220  | 73832451  | + | -1.93 | -3089 | 100155888 | TOX       | 73835425  | 74115352  |
| NC_010448.4    | 32495985  | 32496273  | + | 3.05  | 3443  | 100519713 | TOX3      | 32492686  | 32609923  |
| NC_010448.4    | 120667284 | 120667572 | - | 1.29  | 2806  | 100621913 | TPGS2     | 120605480 | 120670234 |
| NC_010443.5    | 236406667 | 236406956 | - | 3.27  | 3578  | 396693    | TPM2      | 236402249 | 236410390 |
| NC_010445.4    | 59804474  | 59804798  | + | 2.05  | -1834 | 100524432 | TRABD2A   | 59806470  | 59857941  |
| NC_010444.4    | 24603589  | 24603877  | + | 2.05  | 984   | 396629    | TRAF6     | 24602749  | 24628263  |
| NC_010449.5    | 46406526  | 46407089  | - | 1.78  | 175   | 100157796 | TRAM2     | 46323073  | 46406983  |
| NC_010445.4    | 38537724  | 38537955  | + | -0.86 | 1129  | 100515536 | TRAP1     | 38536710  | 38595273  |
| NC_010448.4    | 115785322 | 115785804 | - | 1.68  | 1105  | 100626409 | TRAPPC8   | 115692509 | 115786668 |
| NC_010448.4    | 115786337 | 115786679 | - | 2.10  | 160   | 100626409 | TRAPPC8   | 115692509 | 115786668 |
| NC_010450.4    | 75873181  | 75873488  | - | 3.05  | 2739  | 100627416 | TRIM2     | 75770344  | 75876074  |
| NC_010460.4    | 11151255  | 11151777  | - | 3.46  | 170   | 100620590 | TRIM24    | 11055211  | 11151686  |
| NC_010449.5    | 22768819  | 22769316  | - | 1.73  | -1405 | 100144460 | TRIM26    | 22757794  | 22767662  |
| NC_010444.4    | 119354432 | 119354720 | - | 1.88  | -2185 | 100519890 | TRIM36    | 119304476 | 119352391 |
| NC_010444.4    | 57295131  | 57295569  | - | 3.20  | 364   | 100626621 | TRIM41    | 57285401  | 57295714  |
| NC_010446.5    | 43709456  | 43709882  | + | 2.46  | 1830  | 110260258 | TRIQQ     | 43707839  | 43797108  |
| NC_010450.4    | 120881534 | 120881822 | + | 1.46  | 2210  | 100512243 | TRMT10A   | 120879468 | 120917436 |
| NC_010450.4    | 120879322 | 120879843 | + | 1.01  | 114   | 100512243 | TRMT10A   | 120879468 | 120917436 |
| NC_010443.5    | 37002648  | 37002999  | - | -0.54 | -744  | 100152782 | TRMT11    | 36930857  | 37002079  |
| NC_010444.4    | 7801939   | 7802337   | + | 1.61  | -46   | 100520885 | TRMT112   | 7802184   | 7803556   |

|                |           |           |   |       |       |           |         |           |           |
|----------------|-----------|-----------|---|-------|-------|-----------|---------|-----------|-----------|
| NC_010446.5    | 15196996  | 15197347  | - | 1.31  | -29   | 100155406 | TRMT12  | 15158866  | 15197142  |
| NC_010445.4    | 110383991 | 110384283 | + | 2.05  | 714   | 100520017 | TRMT61B | 110383423 | 110400272 |
| NC_010447.5    | 3223295   | 3223583   | - | 3.05  | -1410 | 100521087 | TRMU    | 3208122   | 3222029   |
| NC_010453.5    | 13521331  | 13521619  | - | 1.14  | -2474 | 100157635 | TRPC4   | 13300288  | 13519001  |
| NC_010459.5    | 38467530  | 38467864  | - | 4.27  | 593   | 100156677 | TRPC4AP | 38385650  | 38468290  |
| NC_010455.5    | 90639803  | 90640091  | + | 2.05  | -548  | 100155608 | TSC22D2 | 90640495  | 90697671  |
| NC_010455.5    | 90636389  | 90636677  | + | 0.88  | -3962 | 100155608 | TSC22D2 | 90640495  | 90697671  |
| NC_010455.5    | 68477657  | 68478335  | + | 2.35  | -2746 | 100525362 | TSEN2   | 68480742  | 68520726  |
| NC_010444.4    | 115830736 | 115830992 | + | -1.12 | -1288 | 100515191 | TSLP    | 115832152 | 115837572 |
| NC_010449.5    | 57186571  | 57186868  | - | 1.88  | 795   | 100157865 | TSPAN3  | 57162080  | 57187515  |
| NC_010454.4    | 34602713  | 34603001  | - | 2.05  | 3766  | 100514918 | TSPOAP1 | 34578698  | 34606623  |
| NC_010461.5    | 47188011  | 47188242  | + | -0.54 | 1516  | 100157624 | TSR2    | 47186610  | 47192465  |
| NC_010458.4    | 25740929  | 25741234  | - | 1.88  | 700   | 100625161 | TTC33   | 25695932  | 25741782  |
| NC_010446.5    | 103675881 | 103676261 | - | 2.14  | 407   | 100156166 | TTF2    | 103632377 | 103676478 |
| NW_018085072.1 | 148762    | 149075    | - | 2.78  | -1134 | 100526252 | TTI2    | 136338    | 147784    |
| NC_010445.4    | 44022133  | 44022421  | - | 3.46  | 334   | 445530    | TTL     | 43980634  | 44022611  |
| NC_010454.4    | 6880630   | 6880918   | - | 2.46  | 750   | 100516219 | TTYH2   | 6838420   | 6881524   |
| NC_010448.4    | 97237036  | 97237326  | - | 1.68  | 3511  | 100623583 | TUBB6   | 97233639  | 97240692  |
| NC_010451.4    | 88784475  | 88784903  | - | -1.54 | 1113  | 100517907 | TWISTNB | 88760394  | 88785802  |
| NC_010451.4    | 88785026  | 88785412  | - | 1.46  | 583   | 100517907 | TWISTNB | 88760394  | 88785802  |
| NC_010445.4    | 54935415  | 54935703  | + | 0.14  | 3798  | 100520954 | TXNDC9  | 54931761  | 54944153  |
| NC_010446.5    | 87994247  | 87994584  | - | 2.27  | -383  | 100156649 | UAP1    | 87960056  | 87994032  |
| NC_010448.4    | 44106621  | 44106909  | + | 1.46  | 3615  | 100739612 | UBA2    | 44103150  | 44141396  |
| NC_010452.4    | 32625276  | 32625595  | - | 0.78  | 598   | 100739464 | UBAP1   | 32552243  | 32626034  |
| NC_010457.5    | 86475170  | 86475401  | + | -0.71 | 4373  | 100520938 | UBE2E3  | 86470912  | 86562297  |
| NC_010460.4    | 18821146  | 18821434  | + | 0.56  | 632   | 100626356 | UBE2H   | 18820658  | 18932909  |
| NC_010449.5    | 56084963  | 56085194  | + | -0.71 | 1058  | 100621770 | UBE2Q2  | 56084020  | 56144915  |
| NC_010446.5    | 62051268  | 62051527  | + | -1.86 | 4829  | 100152196 | UBE2W   | 62046568  | 62084679  |
| NC_010448.4    | 70345953  | 70346241  | + | 2.05  | 284   | 100737278 | UBE4B   | 70345813  | 70462434  |
| NC_010458.4    | 64205487  | 64205899  | - | 2.20  | -9    | 100519748 | UBLCP1  | 64182918  | 64205684  |
| NC_010445.4    | 37553878  | 37554166  | - | 3.05  | 1233  | 100512403 | UBN1    | 37512306  | 37555255  |
| NC_010455.5    | 19274950  | 19275285  | - | -0.27 | 1274  | 100512254 | UBP1    | 19203965  | 19276392  |
| NC_010455.5    | 19276656  | 19276944  | - | 2.46  | -408  | 100512254 | UBP1    | 19203965  | 19276392  |
| NC_010449.5    | 37655453  | 37655754  | + | 0.65  | -204  | 100522688 | UBR2    | 37655808  | 37785301  |

|             |           |           |   |       |       |           |        |           |           |
|-------------|-----------|-----------|---|-------|-------|-----------|--------|-----------|-----------|
| NC_010457.5 | 76135461  | 76135749  | + | 1.78  | 149   | 100521299 | UBR3   | 76135456  | 76360819  |
| NC_010448.4 | 77707758  | 77708046  | - | 3.05  | 89    | 102161705 | UBR4   | 77568409  | 77707991  |
| NC_010457.5 | 59265163  | 59265451  | - | 1.85  | -254  | 100155117 | UGGT1  | 59141582  | 59265053  |
| NC_010455.5 | 135649792 | 135650238 | - | 2.85  | 641   | 100516340 | UMPS   | 135611857 | 135650656 |
| NC_010453.5 | 5359853   | 5360084   | - | -1.35 | 3385  | 100515273 | URAD   | 5353524   | 5363354   |
| NC_010448.4 | 40043627  | 40043915  | + | 1.46  | 451   | 100627684 | URI1   | 40043320  | 40110540  |
| NC_010448.4 | 157219922 | 157220210 | + | 2.05  | -455  | 100620405 | USP24  | 157220521 | 157385329 |
| NC_010448.4 | 157219470 | 157219701 | + | -2.93 | -935  | 100620405 | USP24  | 157220521 | 157385329 |
| NC_010448.4 | 135525302 | 135525766 | + | 1.75  | 1162  | 100625972 | USP33  | 135524372 | 135589742 |
| NC_010447.5 | 87865447  | 87865678  | + | -0.54 | 1151  | 100516911 | USP44  | 87864411  | 87890913  |
| NC_010448.4 | 79810133  | 79810421  | - | 2.46  | -36   | 100625904 | USP48  | 79744942  | 79810241  |
| NC_010447.5 | 63857702  | 63858318  | - | 0.88  | 765   | 100155342 | USP5   | 63843742  | 63858775  |
| NC_010443.5 | 121375673 | 121375961 | - | 1.78  | 337   | 100157546 | USP8   | 121307690 | 121376154 |
| NC_010445.4 | 48872128  | 48872570  | + | 2.88  | 526   | 100513145 | UXS1   | 48871823  | 48940722  |
| NC_010454.4 | 53386590  | 53386878  | - | 1.46  | -4491 | 100620549 | VAMP2  | 53378407  | 53382243  |
| NC_010448.4 | 98258061  | 98258292  | - | -0.60 | -3904 | 100623614 | VAPA   | 98212335  | 98254272  |
| NC_010446.5 | 68072615  | 68073038  | + | 0.73  | -576  | 100621816 | VCPIP1 | 68073403  | 68109221  |
| NC_010446.5 | 68076847  | 68077216  | + | 0.59  | 3628  | 100621816 | VCPIP1 | 68073403  | 68109221  |
| NC_010445.4 | 17386587  | 17386875  | + | 2.46  | 501   | 100522924 | VKORC1 | 17386230  | 17389162  |
| NC_010443.5 | 230070369 | 230070812 | + | 2.11  | 1251  | 100153747 | VPS13A | 230069339 | 230331343 |
| NC_010456.5 | 72212337  | 72212740  | + | 3.01  | 1760  | 100155086 | VPS26A | 72210778  | 72241441  |
| NC_010456.5 | 31865608  | 31865839  | - | -0.12 | 3890  | 100737886 | VPS29  | 31860661  | 31869614  |
| NC_010443.5 | 129144797 | 129145060 | + | -1.86 | 590   | 100513254 | VPS39  | 129144338 | 129198760 |
| NC_010445.4 | 77857521  | 77857752  | + | -0.97 | 1531  | 100621212 | VPS54  | 77856105  | 77978194  |
| NC_010445.4 | 77854828  | 77855116  | + | 1.78  | -1133 | 100621212 | VPS54  | 77856105  | 77978194  |
| NC_010445.4 | 77856575  | 77857037  | + | 2.46  | 701   | 100621212 | VPS54  | 77856105  | 77978194  |
| NC_010445.4 | 83536260  | 83536548  | - | 0.61  | 617   | 100511127 | VRK2   | 83435250  | 83537021  |
| NC_010448.4 | 55034528  | 55034816  | - | 1.05  | -3543 | 100523004 | VRK3   | 54973734  | 55031129  |
| NC_010445.4 | 120291928 | 120292216 | - | 1.88  | -3915 | 100517707 | VSNL1  | 120177897 | 120288157 |
| NC_010443.5 | 22923032  | 22923320  | - | 0.20  | 685   | 100155445 | VTA1   | 22862628  | 22923861  |
| NC_010456.5 | 124574657 | 124574888 | + | -2.12 | -2647 | 100152718 | VWA2   | 124577420 | 124631760 |
| NC_010445.4 | 24093057  | 24093345  | - | 2.20  | 932   | 100524076 | VWA3A  | 24028836  | 24094133  |
| NC_010456.5 | 87588919  | 87589262  | - | 0.61  | -412  | 100157544 | WAPL   | 87492452  | 87588678  |
| NC_010449.5 | 121237017 | 121237482 | - | 0.73  | 827   | 100515390 | WARS   | 121212981 | 121238077 |

|                |           |           |   |       |       |           |         |           |           |
|----------------|-----------|-----------|---|-------|-------|-----------|---------|-----------|-----------|
| NC_010443.5    | 184378521 | 184379075 | - | 1.75  | 176   | 100152808 | WDHD1   | 184300291 | 184378974 |
| NC_010456.5    | 130619414 | 130619702 | + | 2.14  | 634   | 100156416 | WDR11   | 130618924 | 130674536 |
| NW_018084979.1 | 978516    | 978804    | + | 3.78  | 252   | 100516626 | WDR20   | 978408    | 1039635   |
| NC_010446.5    | 102877670 | 102877988 | - | 3.78  | 735   | 100154556 | WDR3    | 102841459 | 102878564 |
| NC_010455.5    | 138109818 | 138110106 | + | 1.05  | 114   | 100627452 | WDR5B   | 138109848 | 138113638 |
| NC_010448.4    | 45420088  | 45420469  | + | 1.46  | 1312  | 100144885 | WDR62   | 45418966  | 45477619  |
| NC_010443.5    | 117946462 | 117946873 | + | 0.31  | 575   | 100153251 | WDR72   | 117946092 | 118124772 |
| NC_010457.5    | 93980517  | 93980805  | + | 0.88  | -393  | 100511538 | WDR75   | 93981054  | 94026479  |
| NC_010455.5    | 34411675  | 34411963  | - | 2.78  | 371   | 100522703 | WDR82   | 34387799  | 34412190  |
| NC_010455.5    | 34410001  | 34410232  | - | -0.93 | 2073  | 100522703 | WDR82   | 34387799  | 34412190  |
| NC_010444.4    | 66312447  | 66312860  | - | 2.68  | 185   | 100519823 | WDR83   | 66307652  | 66312839  |
| NC_010444.4    | 66313072  | 66313405  | + | -1.54 | 314   | 414435    | WDR83OS | 66312924  | 66328000  |
| NC_010443.5    | 194438970 | 194439538 | + | 2.28  | -754  | 100739573 | WDR89   | 194440008 | 194475876 |
| NC_010449.5    | 52140491  | 52140856  | - | -1.44 | -340  | 100153988 | WHAMM   | 52108867  | 52140333  |
| NC_010448.4    | 144247301 | 144247648 | + | -0.54 | 4835  | 100516916 | WLS     | 144242639 | 144529659 |
| NC_010444.4    | 51150861  | 51151346  | + | 4.05  | -2874 | 100514950 | WNT3A   | 51153978  | 51203678  |
| NC_010454.4    | 52955355  | 52955734  | + | 1.27  | 870   | 100522033 | WRAP53  | 52954674  | 52968371  |
| NC_010448.4    | 17230094  | 17230325  | - | -1.12 | -2518 | 100626361 | WWP2    | 17068783  | 17227691  |
| NC_010446.5    | 82433310  | 82433616  | - | 1.20  | 2687  | 100153155 | XCL1    | 82432845  | 82436150  |
| NC_010455.5    | 23878989  | 23879220  | - | -1.71 | -2254 | 100134978 | XIRP1   | 23867476  | 23876850  |
| NC_010447.5    | 7580382   | 7580670   | - | 2.46  | 2437  | 110260639 | XPNPEP3 | 7530993   | 7582963   |
| NC_010445.4    | 80256869  | 80257168  | + | 0.27  | 1948  | 397330    | XPO1    | 80255070  | 80300260  |
| NC_010444.4    | 91358413  | 91358749  | + | 2.27  | 146   | 100514895 | XRCC4   | 91358435  | 91560528  |
| NC_010451.4    | 9275686   | 9276037   | - | 1.46  | 1733  | 100518139 | XRRA1   | 9173666   | 9277595   |
| NC_010447.5    | 73425101  | 73425389  | - | 1.78  | -589  | 110260764 | YAF2    | 73411029  | 73424656  |
| NC_010447.5    | 41561271  | 41561581  | + | 0.61  | -137  | 100624597 | YARS2   | 41561563  | 41571829  |
| NC_010448.4    | 47234532  | 47234820  | - | 2.46  | -339  | 100514844 | YIF1B   | 47224345  | 47234337  |
| NC_010460.4    | 50970497  | 50970785  | - | 2.46  | 743   | 100513964 | YKT6    | 50961451  | 50971384  |
| NC_010451.4    | 67680367  | 67680618  | - | -1.35 | 1228  | 100520400 | YOD1    | 67672640  | 67681721  |
| NC_010450.4    | 66088199  | 66088488  | + | 0.14  | 1804  | 110262114 | YTHDC1  | 66086539  | 66122717  |
| NC_010454.4    | 47643306  | 47643556  | - | -0.71 | 1896  | 100620600 | YWHAE   | 47601133  | 47645327  |
| NC_010455.5    | 157421568 | 157421856 | + | 2.46  | -312  | 100521154 | ZBTB11  | 157422024 | 157460216 |
| NC_010448.4    | 101756792 | 101757080 | + | 3.46  | -131  | 110261173 | ZBTB14  | 101757067 | 101764531 |
| NC_010443.5    | 267438397 | 267438685 | + | -0.12 | 1286  | 100628020 | ZBTB34  | 267437255 | 267465619 |



|             |           |           |   |       |       |           |          |           |           |
|-------------|-----------|-----------|---|-------|-------|-----------|----------|-----------|-----------|
| NC_010448.4 | 88922489  | 88922748  | + | -1.29 | 372   | 100620574 | ZBTB8A   | 88922246  | 88962855  |
| NC_010446.5 | 57817083  | 57817314  | - | -2.03 | 2692  | 100154167 | ZC2HC1A  | 57761249  | 57819891  |
| NC_010460.4 | 10531009  | 10531240  | + | -0.86 | 1319  | 100415778 | ZC3HAV1  | 10529805  | 10588913  |
| NC_010461.5 | 97380596  | 97380884  | + | 2.20  | 832   | 100517990 | ZCCHC12  | 97379908  | 97384384  |
| NC_010443.5 | 159019541 | 159019879 | - | 0.46  | 2433  | 100625613 | ZCCHC2   | 158964816 | 159022143 |
| NC_010443.5 | 159018073 | 159018359 | - | -2.35 | 3927  | 100625613 | ZCCHC2   | 158964816 | 159022143 |
| NC_010452.4 | 28996181  | 28996705  | + | 1.61  | 719   | 100516638 | ZCCHC6   | 28995724  | 29061179  |
| NC_010444.4 | 40312861  | 40313149  | - | 0.46  | -2550 | 100736787 | ZDHHC13  | 40251511  | 40310455  |
| NC_010443.5 | 207837941 | 207838238 | + | 1.98  | 1404  | 100738488 | ZDHHC21  | 207836685 | 207913463 |
| NC_010443.5 | 225711715 | 225712008 | - | 2.73  | 2589  | 100048933 | ZFAND5   | 225703196 | 225714451 |
| NC_010449.5 | 92498066  | 92498430  | - | 1.46  | -2384 | 100624279 | ZFP36L1  | 92490069  | 92495864  |
| NC_010445.4 | 97203039  | 97203393  | + | -0.71 | 2821  | 100513591 | ZFP36L2  | 97200395  | 97203094  |
| NC_010443.5 | 253740284 | 253740572 | - | 1.78  | 2186  | 100517074 | ZFP37    | 253702590 | 253742614 |
| NC_010448.4 | 18335078  | 18335366  | - | 2.78  | 236   | 100620865 | ZFP90    | 18312931  | 18335458  |
| NC_010450.4 | 110090019 | 110090357 | + | 2.88  | 268   | 102167653 | ZGRF1    | 110089920 | 110168086 |
| NC_010446.5 | 16102047  | 16102376  | + | -2.35 | 1438  | 100154564 | ZHX1     | 16100773  | 16126674  |
| NC_010449.5 | 22095913  | 22096415  | + | 1.88  | 3699  | 100156123 | ZKSCAN4  | 22092465  | 22105666  |
| NC_010445.4 | 6443447   | 6443735   | + | 1.46  | 686   | 100522312 | ZKSCAN5  | 6442905   | 6464718   |
| NC_010445.4 | 6441629   | 6441947   | + | 3.05  | -1117 | 100522312 | ZKSCAN5  | 6442905   | 6464718   |
| NC_010444.4 | 142410484 | 142410772 | + | 2.85  | -342  | 100621095 | ZMAT2    | 142410970 | 142417012 |
| NC_010448.4 | 96007688  | 96007976  | + | 4.05  | -475  | 106507628 | ZMPSTE24 | 96008307  | 96057131  |
| NC_010443.5 | 128896037 | 128896325 | + | 2.78  | 2216  | 100620097 | ZNF106   | 128893965 | 128957334 |
| NC_010458.4 | 27814787  | 27815075  | + | 3.46  | 949   | 102159255 | ZNF131   | 27813982  | 27846872  |
| NC_010456.5 | 61048334  | 61048738  | + | 1.73  | 450   | 100155460 | ZNF248   | 61048086  | 61065531  |
| NC_010448.4 | 45859549  | 45859853  | + | 1.68  | 1627  | 106510533 | ZNF260   | 45858074  | 45880194  |
| NC_010454.4 | 58961246  | 58961534  | + | 2.46  | -3023 | 106504195 | ZNF286A  | 58964413  | 58981107  |
| NC_010445.4 | 7981161   | 7981449   | - | 0.88  | 1388  | 100518654 | ZNF3     | 7971917   | 7982693   |
| NC_010444.4 | 67312413  | 67312795  | + | 0.31  | 456   | 100510891 | ZNF317   | 67312148  | 67336323  |
| NC_010449.5 | 38386043  | 38386431  | - | 0.88  | 2493  | 100153069 | ZNF318   | 38356128  | 38388730  |
| NC_010450.4 | 86034317  | 86034605  | - | 3.78  | 2277  | 100511765 | ZNF330   | 86019111  | 86036738  |
| NC_010449.5 | 21389320  | 21389608  | + | 2.68  | 344   | 100155322 | ZNF391   | 21389120  | 21400090  |
| NC_010443.5 | 149512643 | 149512931 | - | 1.46  | 4497  | 100152080 | ZNF407   | 149090502 | 149517284 |
| NC_010444.4 | 15834341  | 15834629  | - | 2.05  | 64    | 100515769 | ZNF408   | 15829489  | 15834549  |
| NC_010455.5 | 27782626  | 27782857  | - | 0.88  | 588   | 100626643 | ZNF445   | 27748437  | 27783330  |

|             |           |           |   |       |       |           |        |           |           |
|-------------|-----------|-----------|---|-------|-------|-----------|--------|-----------|-----------|
| NC_010448.4 | 63051292  | 63051580  | + | 1.20  | 2035  | 110261336 | ZNF446 | 63049401  | 63057863  |
| NC_010448.4 | 46302355  | 46302643  | + | 0.88  | -1762 | 102165184 | ZNF527 | 46304261  | 46328232  |
| NC_010444.4 | 70605897  | 70606185  | - | 0.88  | -595  | 100514703 | ZNF558 | 70578256  | 70605446  |
| NC_010448.4 | 46443039  | 46443327  | + | 1.88  | 626   | 100739461 | ZNF570 | 46442557  | 46468679  |
| NC_010448.4 | 59746639  | 59746870  | + | 0.46  | 560   | 100620473 | ZNF581 | 59746194  | 59767421  |
| NC_010444.4 | 128157092 | 128157382 | - | -0.54 | -468  | 100512589 | ZNF608 | 128048247 | 128156769 |
| NC_010446.5 | 939734    | 940070    | - | 3.78  | 656   | 110260414 | ZNF623 | 928786    | 940558    |
| NC_010454.4 | 58986128  | 58986485  | + | -0.60 | -290  | 100626993 | ZNF624 | 58986597  | 59006958  |
| NC_010452.4 | 38817710  | 38817998  | - | 1.78  | 605   | 110255680 | ZNF658 | 38797314  | 38818459  |
| NC_010452.4 | 38818277  | 38818565  | - | -0.95 | 38    | 110255680 | ZNF658 | 38797314  | 38818459  |
| NC_010445.4 | 17794685  | 17795066  | + | 2.88  | 3442  | 100515603 | ZNF688 | 17791433  | 17795431  |
| NC_010460.4 | 55934638  | 55934926  | + | 1.20  | 2445  | 110257534 | ZNF775 | 55932337  | 55954153  |
| NC_010445.4 | 6482739   | 6483027   | - | 1.78  | -1427 | 100519827 | ZNF789 | 6468709   | 6481456   |
| NC_010460.4 | 42651016  | 42651304  | - | 2.05  | 754   | 100514021 | ZNRF2  | 42550571  | 42651914  |
| NC_010449.5 | 22077767  | 22078073  | + | -2.71 | -4155 | 100154531 | ZSCAN9 | 22082075  | 22089724  |
| NC_010448.4 | 166134064 | 166134352 | + | 2.46  | -3919 | 100514968 | ZSWIM5 | 166138127 | 166326002 |
| NC_010448.4 | 159479004 | 159479235 | - | 0.14  | 1497  | 100739208 | ZYG11B | 159407921 | 159480617 |
| NC_010460.4 | 6870080   | 6870368   | - | 2.05  | 10    | 100524720 | ZYX    | 6861072   | 6870234   |

---

**Table S10.** Gene Ontology analyses for genes associated with H3K4me3 modifications.

| Term type          | GO accession | Description                                                           | P Value    | Gene ID                                                                                                             |
|--------------------|--------------|-----------------------------------------------------------------------|------------|---------------------------------------------------------------------------------------------------------------------|
| Biological process | GO:0010769   | regulation of cell morphogenesis involved in differentiation          | 0.00076207 | 100381266/780428/100144501/595117/445530                                                                            |
| Biological process | GO:0010720   | positive regulation of cell development                               | 0.00472879 | 100145887/100381266/780428/100519689/595117                                                                         |
| Biological process | GO:0010770   | positive regulation of cell morphogenesis involved in differentiation | 0.00538142 | 100381266/780428/595117                                                                                             |
| Biological process | GO:0016482   | cytosolic transport                                                   | 0.00538142 | 733576/595112/100144499                                                                                             |
| Biological process | GO:0007399   | nervous system development                                            | 0.00715471 | 100145887/100381266/397674/780428/100144501/100038004/595120/100519689/397247/595117/396584/396629/445530/100144885 |
| Biological process | GO:0007409   | axonogenesis                                                          | 0.00793462 | 100144501/100038004/595117/445530                                                                                   |
| Biological process | GO:0032872   | regulation of stress-activated MAPK cascade                           | 0.00793462 | 100145887/397350/448810/396629                                                                                      |
| Biological process | GO:0051403   | stress-activated MAPK cascade                                         | 0.00793462 | 100145887/397350/448810/396629                                                                                      |
| Biological process | GO:0070302   | regulation of stress-activated protein kinase signaling cascade       | 0.00793462 | 100145887/397350/448810/396629                                                                                      |
| Biological process | GO:0000904   | cell morphogenesis involved in differentiation                        | 0.00845775 | 100381266/780428/100144501/100038004/595117/445530                                                                  |
| Cellular component | GO:0044440   | endosomal part                                                        | 0.00448365 | 733576/595120/100519689/595117/595112/100144499/733610                                                              |
| Cellular component | GO:0005819   | spindle                                                               | 0.00841647 | 100145887/780428/448810/397656/595117/396584/100144885                                                              |
| Molecular function | GO:0050839   | cell adhesion molecule binding                                        | 0.00699647 | 100381266/403163/397247/445534/100125376                                                                            |
